# Supplementary material for: Decoding the differentiation of mesenchymal stem cells into mesangial cells at the transcriptomic level
Source: PubMed Central journal article supplement (PMC7339572; doi:10.1186/s12864-020-06868-5), 2020-07-07
Supplement: 12864_2020_6868_MOESM2_ESM.pdf [file 12864_2020_6868_MOESM2_ESM.pdf]

## TF in TO-GCN

|    | <u>Ensembl Gene ID</u> | <u>Gene Names</u> | <u>TF family</u> | <u>TF level</u> | <u>Descending (DE)</u> | <u>Ascending (DE)</u> |
|----|------------------------|-------------------|------------------|-----------------|------------------------|-----------------------|
| 1  | ENSG00000175592        | FOSL1             | TF_bZIP          | 1               | 0                      | 12                    |
| 2  | ENSG00000111206        | FOXM1             | Fork_head        | 1               | 1                      | 12                    |
| 3  | ENSG00000124191        | TOX2              | HMG              | 1               | 1                      | 12                    |
| 4  | ENSG00000137309        | HMGA1             | HMGA             | 1               | 1                      | 12                    |
| 5  | ENSG00000029993        | HMGB3             | HMG              | 1               | 2                      | 12                    |
| 6  | ENSG00000081059        | TCF7              | HMG              | 1               | 2                      | 12                    |
| 7  | ENSG00000101057        | MYBL2             | MYB              | 1               | 2                      | 12                    |
| 8  | ENSG00000101412        | E2F1              | E2F              | 1               | 2                      | 12                    |
| 9  | ENSG00000137310        | TCF19             | Others           | 1               | 2                      | 12                    |
| 10 | ENSG00000165244        | ZNF367            | zf-C2H2          | 1               | 2                      | 12                    |
| 11 | ENSG00000165891        | E2F7              | E2F              | 1               | 2                      | 12                    |
| 12 | ENSG00000176692        | FOXC2             | Fork_head        | 1               | 2                      | 12                    |
| 13 | ENSG00000196460        | RFX8              | RFX              | 1               | 2                      | 12                    |
| 14 | ENSG00000244405        | ETV5              | ETS              | 1               | 2                      | 12                    |
| 15 | ENSG00000103326        | CAPN15            | Others           | 1               | 3                      | 12                    |
| 16 | ENSG00000108511        | HOXB6             | Homeobox         | 1               | 3                      | 12                    |
| 17 | ENSG00000115163        | CENPA             | Others           | 1               | 3                      | 12                    |
| 18 | ENSG00000125347        | IRF1              | IRF              | 1               | 3                      | 12                    |
| 19 | ENSG00000149948        | HMGA2             | HMGA             | 1               | 3                      | 12                    |
| 20 | ENSG00000172819        | RARG              | THR-like         | 1               | 3                      | 12                    |
| 21 | ENSG00000173153        | ESRRB             | ESR-like         | 1               | 3                      | 12                    |
| 22 | ENSG00000006468        | ETV1              | ETS              | 1               | 3                      | 12                    |
| 23 | ENSG00000109685        | NSD2              | HMG              | 1               | 3                      | 12                    |
| 24 | ENSG00000115844        | DLX2              | Homeobox         | 1               | 3                      | 12                    |
| 25 | ENSG00000149480        | MTA2              | zf-GATA          | 1               | 3                      | 12                    |
| 26 | ENSG00000152784        | PRDM8             | zf-C2H2          | 1               | 3                      | 12                    |
| 27 | ENSG00000007968        | E2F2              | E2F              | 1               | 4                      | 12                    |
| 28 | ENSG00000115816        | CEBPZ             | Others           | 1               | 4                      | 12                    |
| 29 | ENSG00000135111        | TBX3              | T-box            | 1               | 4                      | 12                    |
| 30 | ENSG00000144355        | DLX1              | Homeobox         | 1               | 4                      | 12                    |
| 31 | ENSG00000167491        | GATAD2A           | zf-GATA          | 1               | 4                      | 12                    |
| 32 | ENSG00000196793        | ZNF239            | zf-C2H2          | 1               | 4                      | 12                    |
| 33 | ENSG00000101096        | NFATC2            | RHD              | 1               | 4                      | 12                    |
| 34 | ENSG00000108064        | TFAM              | HMG              | 1               | 4                      | 12                    |
| 35 | ENSG00000143867        | OSR1              | zf-C2H2          | 1               | 4                      | 12                    |
| 36 | ENSG00000164104        | HMGB2             | HMG              | 1               | 4                      | 12                    |
| 37 | ENSG00000197961        | ZNF121            | zf-C2H2          | 1               | 4                      | 12                    |
| 38 | ENSG00000198554        | WDHD1             | HMG              | 1               | 4                      | 12                    |
| 39 | ENSG00000174738        | NR1D2             | THR-like         | 1               | 4                      | 11                    |
| 40 | ENSG00000105821        | DNAJC2            | MYB              | 1               | 5                      | 12                    |
| 41 | ENSG00000116560        | SFPQ              | Others           | 1               | 5                      | 12                    |
| 42 | ENSG00000117010        | ZNF684            | zf-C2H2          | 1               | 5                      | 12                    |
| 43 | ENSG00000129173        | E2F8              | E2F              | 1               | 5                      | 12                    |
| 44 | ENSG00000175832        | ETV4              | ETS              | 1               | 5                      | 12                    |
| 45 | ENSG00000078399        | HOXA9             | Homeobox         | 1               | 5                      | 12                    |
| 46 | ENSG00000121068        | TBX2              | T-box            | 1               | 5                      | 12                    |
| 47 | ENSG00000169689        | CENPX             | Others           | 1               | 5                      | 12                    |
| 48 | ENSG00000179388        | EGR3              | zf-C2H2          | 1               | 5                      | 12                    |
| 49 | ENSG00000181472        | ZBTB2             | ZBTB             | 1               | 5                      | 12                    |
| 50 | ENSG00000189403        | HMGB1             | HMG              | 1               | 5                      | 12                    |
| 51 | ENSG00000106511        | MEOX2             | Homeobox         | 1               | 5                      | 11                    |
| 52 | ENSG00000149136        | SSRP1             | HMG              | 1               | 6                      | 12                    |
| 53 | ENSG00000105750        | ZNF85             | zf-C2H2          | 1               | 6                      | 12                    |
| 54 | ENSG00000162599        | NFIA              | CTF/NFI          | 1               | 6                      | 12                    |
| 55 | ENSG00000095794        | CREM              | TF_bZIP          | 1               | 7                      | 12                    |
| 56 | ENSG00000059378        | PARP12            | Others           | 1               | 7                      | 12                    |
| 57 | ENSG00000134532        | SOX5              | HMG              | 1               | 7                      | 12                    |
| 58 | ENSG00000138795        | LEF1              | HMG              | 1               | 7                      | 12                    |
| 59 | ENSG00000197124        | ZNF682            | zf-C2H2          | 1               | 7                      | 11                    |
| 60 | ENSG00000153234        | NR4A2             | NGFIB-like       | 1               | 8                      | 12                    |
| 61 | ENSG00000164379        | FOXQ1             | Fork_head        | 1               | 8                      | 12                    |
| 62 | ENSG00000183647        | ZNF530            | zf-C2H2          | 1               | 8                      | 12                    |
| 63 | ENSG00000103343        | ZNF174            | zf-C2H2          | 1               | 8                      | 11                    |
| 64 | ENSG00000120738        | EGR1              | zf-C2H2          | 1               | 8                      | 9                     |
| 65 | ENSG00000125968        | ID1               | bHLH             | 2               | 2                      | 12                    |
| 66 | ENSG00000008083        | JARID2            | ARID             | 2               | 2                      | 11                    |
| 67 | ENSG00000177426        | TGIF1             | Homeobox         | 2               | 3                      | 12                    |
| 68 | ENSG00000125398        | SOX9              | HMG              | 2               | 3                      | 10                    |
| 69 | ENSG00000108788        | MLX               | bHLH             | 2               | 4                      | 12                    |
| 70 | ENSG00000088247        | KHSRP             | Others           | 2               | 4                      | 12                    |
| 71 | ENSG00000182903        | ZNF721            | zf-C2H2          | 2               | 4                      | 11                    |
| 72 | ENSG00000029153        | ARNTL2            | bHLH             | 2               | 4                      | 10                    |
| 73 | ENSG00000126368        | NR1D1             | THR-like         | 2               | 4                      | 10                    |
| 74 | ENSG00000127337        | YEATS4            | Others           | 2               | 5                      | 12                    |
| 75 | ENSG00000129028        | THAP10            | THAP             | 2               | 5                      | 12                    |
| 76 | ENSG00000198028        | ZNF560            | zf-C2H2          | 2               | 5                      | 12                    |
| 77 | ENSG00000213347        | MXD3              | bHLH             | 2               | 5                      | 12                    |
| 78 | ENSG00000111145        | ELK3              | ETS              | 2               | 5                      | 12                    |
| 79 | ENSG00000113387        | SUB1              | PC4              | 2               | 5                      | 12                    |
| 80 | ENSG00000114315        | HES1              | bHLH             | 2               | 5                      | 12                    |
| 81 | ENSG00000170684        | ZNF296            | zf-C2H2          | 2               | 5                      | 12                    |
| 82 | ENSG00000197714        | ZNF460            | zf-C2H2          | 2               | 5                      | 12                    |
| 83 | ENSG00000198176        | TFDP1             | E2F              | 2               | 5                      | 12                    |
| 84 | ENSG00000197472        | ZNF695            | zf-C2H2          | 2               | 5                      | 11                    |
| 85 | ENSG00000028277        | POU2F2            | Pou              | 2               | 5                      | 11                    |
| 86 | ENSG00000135547        | HEY2              | bHLH             | 2               | 5                      | 11                    |
| 87 | ENSG00000185960        | SHOX              | Homeobox         | 2               | 5                      | 11                    |
| 88 | ENSG00000168874        | ATOX8             | bHLH             | 2               | 5                      | 11                    |
| 89 | ENSG00000001167        | NFYA              | NF-YA            | 2               | 5                      | 10                    |
| 90 | ENSG00000116132        | PRRX1             | Homeobox         | 2               | 5                      | 10                    |
| 91 | ENSG00000182158        | CREB3L2           | TF_bZIP          | 2               | 5                      | 10                    |

|     |                 |          |           |   |    |    |
|-----|-----------------|----------|-----------|---|----|----|
| 92  | ENSG00000138375 | SMARCAL1 | Others    | 2 | 5  | 9  |
| 93  | ENSG00000176678 | FOXL1    | Fork_head | 2 | 5  | 9  |
| 94  | ENSG00000066136 | NFYC     | NF-YC     | 2 | 6  | 12 |
| 95  | ENSG00000171466 | ZNF562   | zf-C2H2   | 2 | 6  | 12 |
| 96  | ENSG00000173917 | HOXB2    | Homeobox  | 2 | 6  | 12 |
| 97  | ENSG00000175279 | CENPS    | Others    | 2 | 6  | 12 |
| 98  | ENSG00000197063 | MAFG     | TF_bZIP   | 2 | 6  | 12 |
| 99  | ENSG00000102901 | CENPT    | Others    | 2 | 6  | 12 |
| 100 | ENSG00000122691 | TWIST1   | bHLH      | 2 | 6  | 12 |
| 101 | ENSG00000132010 | ZNF20    | zf-C2H2   | 2 | 6  | 12 |
| 102 | ENSG00000167085 | PHB      | Others    | 2 | 6  | 12 |
| 103 | ENSG00000196652 | ZKSCAN5  | zf-C2H2   | 2 | 6  | 12 |
| 104 | ENSG0000010244  | ZNF207   | Others    | 2 | 6  | 11 |
| 105 | ENSG00000067082 | KLF6     | zf-C2H2   | 2 | 6  | 11 |
| 106 | ENSG00000153207 | AHCTF1   | Others    | 2 | 6  | 11 |
| 107 | ENSG00000197857 | ZNF44    | zf-C2H2   | 2 | 6  | 11 |
| 108 | ENSG00000124496 | TRERF1   | zf-C2H2   | 2 | 6  | 11 |
| 109 | ENSG00000143390 | RFX5     | RFX       | 2 | 6  | 11 |
| 110 | ENSG00000146676 | PURB     | Others    | 2 | 6  | 11 |
| 111 | ENSG00000185022 | MAFF     | TF_bZIP   | 2 | 6  | 11 |
| 112 | ENSG00000178177 | LCORL    | HTH       | 2 | 6  | 10 |
| 113 | ENSG00000065978 | YBX1     | CSD       | 2 | 6  | 10 |
| 114 | ENSG00000110851 | PRDM4    | zf-C2H2   | 2 | 6  | 10 |
| 115 | ENSG00000118922 | KLF12    | zf-C2H2   | 2 | 6  | 10 |
| 116 | ENSG00000073584 | SMARCE1  | HMG       | 2 | 6  | 10 |
| 117 | ENSG00000256229 | ZNF486   | zf-C2H2   | 2 | 6  | 10 |
| 118 | ENSG00000125740 | FOSB     | TF_bZIP   | 2 | 7  | 12 |
| 119 | ENSG00000167562 | ZNF701   | zf-C2H2   | 2 | 7  | 12 |
| 120 | ENSG00000167766 | ZNF83    | zf-C2H2   | 2 | 7  | 12 |
| 121 | ENSG00000175322 | ZNF519   | zf-C2H2   | 2 | 7  | 12 |
| 122 | ENSG00000185697 | MYBL1    | MYB       | 2 | 7  | 12 |
| 123 | ENSG00000169714 | CNBP     | Others    | 2 | 7  | 12 |
| 124 | ENSG00000213967 | ZNF726   | zf-C2H2   | 2 | 7  | 12 |
| 125 | ENSG00000052850 | ALX4     | Homeobox  | 2 | 7  | 11 |
| 126 | ENSG00000159556 | ISL2     | Homeobox  | 2 | 7  | 11 |
| 127 | ENSG00000108001 | EBF3     | COE       | 2 | 7  | 11 |
| 128 | ENSG00000236287 | ZBED5    | zf-BED    | 2 | 7  | 11 |
| 129 | ENSG00000129534 | MIS18BP1 | MYB       | 2 | 7  | 10 |
| 130 | ENSG00000134046 | MBD2     | MBD       | 2 | 7  | 10 |
| 131 | ENSG00000188295 | ZNF669   | zf-C2H2   | 2 | 7  | 10 |
| 132 | ENSG00000213988 | ZNF90    | zf-C2H2   | 2 | 7  | 10 |
| 133 | ENSG00000213793 | ZNF888   | zf-C2H2   | 2 | 7  | 9  |
| 134 | ENSG00000198342 | ZNF442   | zf-C2H2   | 2 | 8  | 12 |
| 135 | ENSG00000198298 | ZNF485   | zf-C2H2   | 2 | 8  | 11 |
| 136 | ENSG00000267041 | ZNF850   | zf-C2H2   | 2 | 8  | 11 |
| 137 | ENSG00000125482 | TTF1     | MYB       | 2 | 8  | 11 |
| 138 | ENSG00000198039 | ZNF273   | zf-C2H2   | 2 | 8  | 10 |
| 139 | ENSG00000141956 | PRDM15   | zf-C2H2   | 2 | 8  | 9  |
| 140 | ENSG00000172273 | HINFP    | zf-C2H2   | 2 | 9  | 12 |
| 141 | ENSG00000132170 | PPARG    | THR-like  | 2 | 9  | 12 |
| 142 | ENSG00000005436 | GCFC2    | GCFC      | 2 | 9  | 11 |
| 143 | ENSG00000181450 | ZNF678   | zf-C2H2   | 2 | 9  | 11 |
| 144 | ENSG00000157557 | ETS2     | ETS       | 2 | 9  | 10 |
| 145 | ENSG00000188313 | PLSCR1   | Others    | 2 | 9  | 10 |
| 146 | ENSG00000204366 | ZBTB12   | ZBTB      | 2 | 10 | 11 |
| 147 | ENSG00000197905 | TEAD4    | TEA       | 3 | 5  | 12 |
| 148 | ENSG00000152804 | HHEX     | Homeobox  | 3 | 5  | 11 |
| 149 | ENSG00000112365 | ZBTB24   | ZBTB      | 3 | 5  | 10 |
| 150 | ENSG00000170100 | ZNF778   | zf-C2H2   | 3 | 5  | 9  |
| 151 | ENSG00000186230 | ZNF749   | zf-C2H2   | 3 | 5  | 9  |
| 152 | ENSG00000185630 | PBX1     | Homeobox  | 3 | 5  | 8  |
| 153 | ENSG00000005801 | ZNF195   | zf-C2H2   | 3 | 6  | 11 |
| 154 | ENSG00000160352 | ZNF714   | zf-C2H2   | 3 | 6  | 11 |
| 155 | ENSG00000204519 | ZNF551   | zf-C2H2   | 3 | 6  | 11 |
| 156 | ENSG00000057657 | PRDM1    | zf-C2H2   | 3 | 6  | 11 |
| 157 | ENSG00000140987 | ZSCAN32  | zf-C2H2   | 3 | 6  | 11 |
| 158 | ENSG00000153560 | UBP1     | CP2       | 3 | 6  | 11 |
| 159 | ENSG00000173473 | SMARCC1  | MYB       | 3 | 6  | 11 |
| 160 | ENSG00000166949 | SMAD3    | MH1       | 3 | 6  | 11 |
| 161 | ENSG00000204514 | ZNF814   | zf-C2H2   | 3 | 6  | 11 |
| 162 | ENSG00000131788 | PIAS3    | zf-MIZ    | 3 | 6  | 10 |
| 163 | ENSG00000143067 | ZNF697   | zf-C2H2   | 3 | 6  | 10 |
| 164 | ENSG00000186660 | ZFP91    | zf-C2H2   | 3 | 6  | 10 |
| 165 | ENSG00000214575 | CPEB1    | Others    | 3 | 6  | 10 |
| 166 | ENSG00000065970 | FOXJ2    | Fork_head | 3 | 6  | 10 |
| 167 | ENSG00000067646 | ZFY      | zf-C2H2   | 3 | 6  | 10 |
| 168 | ENSG00000117475 | BLZF1    | Others    | 3 | 6  | 10 |
| 169 | ENSG00000118217 | ATF6     | TF_bZIP   | 3 | 6  | 10 |
| 170 | ENSG00000269343 | ZNF587B  | zf-C2H2   | 3 | 6  | 10 |
| 171 | ENSG00000197928 | ZNF677   | zf-C2H2   | 3 | 6  | 10 |
| 172 | ENSG00000173011 | TADA2B   | MYB       | 3 | 6  | 9  |
| 173 | ENSG00000136997 | MYC      | bHLH      | 3 | 6  | 8  |
| 174 | ENSG00000135899 | SP110    | SAND      | 3 | 7  | 12 |
| 175 | ENSG00000145220 | LYAR     | Others    | 3 | 7  | 12 |
| 176 | ENSG00000064933 | PMS1     | HMG       | 3 | 7  | 12 |
| 177 | ENSG00000126456 | IRF3     | IRF       | 3 | 7  | 12 |
| 178 | ENSG00000019549 | SNAI2    | zf-C2H2   | 3 | 7  | 11 |
| 179 | ENSG00000029363 | BCLAF1   | Others    | 3 | 7  | 11 |
| 180 | ENSG00000172466 | ZNF24    | zf-C2H2   | 3 | 7  | 11 |
| 181 | ENSG00000136169 | SETDB2   | MBD       | 3 | 7  | 11 |
| 182 | ENSG00000067955 | CBFB     | CBF       | 3 | 7  | 10 |
| 183 | ENSG00000105497 | ZNF175   | zf-C2H2   | 3 | 7  | 10 |
| 184 | ENSG00000134852 | CLOCK    | bHLH      | 3 | 7  | 10 |
| 185 | ENSG00000171467 | ZNF318   | Others    | 3 | 7  | 10 |

|     |                 |         |          |   |    |    |
|-----|-----------------|---------|----------|---|----|----|
| 186 | ENSG0000075407  | ZNF37A  | zf-C2H2  | 3 | 7  | 10 |
| 187 | ENSG00000116793 | PHTF1   | Others   | 3 | 7  | 10 |
| 188 | ENSG00000140548 | ZNF710  | zf-C2H2  | 3 | 7  | 10 |
| 189 | ENSG00000141027 | NCOR1   | MYB      | 3 | 7  | 10 |
| 190 | ENSG00000169955 | ZNF747  | zf-C2H2  | 3 | 7  | 10 |
| 191 | ENSG00000185947 | ZNF267  | zf-C2H2  | 3 | 7  | 10 |
| 192 | ENSG00000186416 | NKRF    | Others   | 3 | 7  | 10 |
| 193 | ENSG00000196247 | ZNF107  | zf-C2H2  | 3 | 7  | 10 |
| 194 | ENSG00000197933 | ZNF823  | zf-C2H2  | 3 | 7  | 10 |
| 195 | ENSG00000198300 | n_a     | zf-C2H2  | 3 | 7  | 10 |
| 196 | ENSG00000198482 | ZNF808  | zf-C2H2  | 3 | 7  | 10 |
| 197 | ENSG00000245848 | CEBPA   | TF_bZIP  | 3 | 7  | 10 |
| 198 | ENSG00000066422 | ZBTB11  | ZBTB     | 3 | 7  | 9  |
| 199 | ENSG00000172262 | ZNF131  | ZBTB     | 3 | 7  | 9  |
| 200 | ENSG00000081189 | MEF2C   | SRF      | 3 | 7  | 9  |
| 201 | ENSG00000123933 | MXD4    | bHLH     | 3 | 7  | 9  |
| 202 | ENSG00000144655 | CSRNP1  | CSRNP_N  | 3 | 7  | 9  |
| 203 | ENSG00000090447 | TFAP4   | bHLH     | 3 | 8  | 12 |
| 204 | ENSG00000179965 | ZNF771  | zf-C2H2  | 3 | 8  | 12 |
| 205 | ENSG00000116044 | NFE2L2  | TF_bZIP  | 3 | 8  | 11 |
| 206 | ENSG00000127124 | HIVEP3  | zf-C2H2  | 3 | 8  | 11 |
| 207 | ENSG00000093167 | LRRFIP2 | LRRFIP   | 3 | 8  | 11 |
| 208 | ENSG00000102974 | CTCF    | zf-C2H2  | 3 | 8  | 11 |
| 209 | ENSG00000112242 | E2F3    | E2F      | 3 | 8  | 11 |
| 210 | ENSG00000127152 | BCL11B  | zf-C2H2  | 3 | 8  | 11 |
| 211 | ENSG00000147601 | TERF1   | MYB      | 3 | 8  | 11 |
| 212 | ENSG00000163939 | PBRM1   | HMG      | 3 | 8  | 11 |
| 213 | ENSG00000196345 | ZKSCAN7 | zf-C2H2  | 3 | 8  | 11 |
| 214 | ENSG00000131848 | ZSCAN5A | zf-C2H2  | 3 | 8  | 11 |
| 215 | ENSG00000129535 | NRL     | TF_bZIP  | 3 | 8  | 10 |
| 216 | ENSG00000171649 | ZIK1    | zf-C2H2  | 3 | 8  | 10 |
| 217 | ENSG00000185252 | ZNF74   | zf-C2H2  | 3 | 8  | 10 |
| 218 | ENSG00000096401 | CDC5L   | MYB      | 3 | 8  | 10 |
| 219 | ENSG00000105996 | HOXA2   | Homeobox | 3 | 8  | 10 |
| 220 | ENSG00000119042 | SATB2   | CUT      | 3 | 8  | 10 |
| 221 | ENSG00000158805 | ZNF276  | zf-C2H2  | 3 | 8  | 10 |
| 222 | ENSG00000186446 | ZNF501  | zf-C2H2  | 3 | 8  | 10 |
| 223 | ENSG00000160199 | PKNOX1  | Homeobox | 3 | 8  | 10 |
| 224 | ENSG00000198131 | ZNF544  | zf-C2H2  | 3 | 8  | 10 |
| 225 | ENSG00000011451 | WIZ     | zf-C2H2  | 3 | 8  | 9  |
| 226 | ENSG00000196757 | ZNF700  | zf-C2H2  | 3 | 8  | 9  |
| 227 | ENSG00000204531 | POU5F1  | Pou      | 3 | 8  | 7  |
| 228 | ENSG00000104903 | LYL1    | bHLH     | 3 | 9  | 12 |
| 229 | ENSG00000196458 | ZNF605  | zf-C2H2  | 3 | 9  | 12 |
| 230 | ENSG00000197343 | ZNF655  | zf-C2H2  | 3 | 9  | 12 |
| 231 | ENSG00000162664 | ZNF326  | Others   | 3 | 9  | 11 |
| 232 | ENSG00000072736 | NFATC3  | RHD      | 3 | 9  | 11 |
| 233 | ENSG00000102935 | ZNF423  | zf-C2H2  | 3 | 9  | 11 |
| 234 | ENSG00000130584 | ZBTB46  | ZBTB     | 3 | 9  | 11 |
| 235 | ENSG00000180938 | ZNF572  | zf-C2H2  | 3 | 9  | 11 |
| 236 | ENSG00000140262 | TCF12   | bHLH     | 3 | 9  | 11 |
| 237 | ENSG00000156853 | ZNF689  | zf-C2H2  | 3 | 9  | 11 |
| 238 | ENSG00000250312 | ZNF718  | zf-C2H2  | 3 | 9  | 11 |
| 239 | ENSG00000179348 | GATA2   | zf-GATA  | 3 | 9  | 11 |
| 240 | ENSG00000115355 | CCDC88A | TF_bZIP  | 3 | 9  | 10 |
| 241 | ENSG00000147180 | ZNF711  | zf-C2H2  | 3 | 9  | 10 |
| 242 | ENSG00000175745 | NR2F1   | RXR-like | 3 | 9  | 10 |
| 243 | ENSG00000234444 | ZNF736  | zf-C2H2  | 3 | 9  | 10 |
| 244 | ENSG00000277462 | ZNF670  | zf-C2H2  | 3 | 9  | 10 |
| 245 | ENSG00000153896 | ZNF599  | zf-C2H2  | 3 | 9  | 10 |
| 246 | ENSG00000185404 | SP140L  | SAND     | 3 | 9  | 9  |
| 247 | ENSG00000167034 | NKX3-1  | Homeobox | 3 | 9  | 8  |
| 248 | ENSG00000145908 | ZNF300  | zf-C2H2  | 3 | 10 | 11 |
| 249 | ENSG00000128652 | HOXD3   | Homeobox | 3 | 10 | 10 |
| 250 | ENSG00000137492 | THAP12  | THAP     | 3 | 10 | 10 |
| 251 | ENSG00000169594 | BNC1    | zf-C2H2  | 3 | 10 | 10 |
| 252 | ENSG00000089335 | ZNF302  | zf-C2H2  | 3 | 11 | 11 |
| 253 | ENSG00000187801 | ZFP69B  | zf-C2H2  | 3 | 11 | 9  |
| 254 | ENSG00000141510 | TP53    | P53      | 4 | 5  | 10 |
| 255 | ENSG00000135457 | TFCP2   | CP2      | 4 | 6  | 10 |
| 256 | ENSG00000213762 | ZNF134  | zf-C2H2  | 4 | 6  | 10 |
| 257 | ENSG00000171735 | CAMTA1  | CG-1     | 4 | 6  | 10 |
| 258 | ENSG00000197114 | ZGPAT   | Others   | 4 | 6  | 10 |
| 259 | ENSG00000198081 | ZBTB14  | ZBTB     | 4 | 7  | 11 |
| 260 | ENSG00000130338 | TULP4   | Tub      | 4 | 7  | 11 |
| 261 | ENSG00000101665 | SMAD7   | MH1      | 4 | 7  | 10 |
| 262 | ENSG00000131931 | THAP1   | THAP     | 4 | 7  | 10 |
| 263 | ENSG00000107175 | CREB3   | TF_bZIP  | 4 | 7  | 10 |
| 264 | ENSG00000091831 | ESR1    | ESR-like | 4 | 7  | 10 |
| 265 | ENSG00000092607 | TBX15   | T-box    | 4 | 7  | 9  |
| 266 | ENSG00000164330 | EBF1    | COE      | 4 | 7  | 9  |
| 267 | ENSG00000166860 | ZBTB39  | ZBTB     | 4 | 7  | 9  |
| 268 | ENSG00000168310 | IRF2    | IRF      | 4 | 7  | 9  |
| 269 | ENSG00000143578 | CREB3L4 | TF_bZIP  | 4 | 7  | 9  |
| 270 | ENSG00000258405 | ZNF578  | zf-C2H2  | 4 | 7  | 9  |
| 271 | ENSG00000177508 | IRX3    | Homeobox | 4 | 7  | 9  |
| 272 | ENSG00000179981 | TSHZ1   | zf-C2H2  | 4 | 7  | 8  |
| 273 | ENSG00000141905 | NFIC    | CTF/NFI  | 4 | 7  | 7  |
| 274 | ENSG00000167981 | ZNF597  | zf-C2H2  | 4 | 8  | 12 |
| 275 | ENSG00000188321 | ZNF559  | zf-C2H2  | 4 | 8  | 12 |
| 276 | ENSG00000104856 | RELB    | RHD      | 4 | 8  | 11 |
| 277 | ENSG00000108175 | ZMIZ1   | zf-MIZ   | 4 | 8  | 11 |
| 278 | ENSG00000170365 | SMAD1   | MH1      | 4 | 8  | 11 |
| 279 | ENSG00000172748 | ZNF596  | zf-C2H2  | 4 | 8  | 11 |

|     |                 |         |           |   |    |    |
|-----|-----------------|---------|-----------|---|----|----|
| 280 | ENSG00000173451 | THAP2   | THAP      | 4 | 8  | 11 |
| 281 | ENSG00000059728 | MXD1    | bHLH      | 4 | 8  | 11 |
| 282 | ENSG00000149054 | ZNF215  | zf-C2H2   | 4 | 8  | 11 |
| 283 | ENSG00000171161 | ZNF672  | zf-C2H2   | 4 | 8  | 11 |
| 284 | ENSG00000163132 | MSX1    | Homeobox  | 4 | 8  | 11 |
| 285 | ENSG00000167074 | TEF     | TF_bZIP   | 4 | 8  | 11 |
| 286 | ENSG00000141644 | MBD1    | MBD       | 4 | 8  | 11 |
| 287 | ENSG00000113580 | NR3C1   | ESR-like  | 4 | 8  | 10 |
| 288 | ENSG00000126746 | ZNF384  | zf-C2H2   | 4 | 8  | 10 |
| 289 | ENSG00000136451 | VEZF1   | zf-C2H2   | 4 | 8  | 10 |
| 290 | ENSG00000177485 | ZBTB33  | ZBTB      | 4 | 8  | 10 |
| 291 | ENSG00000181896 | ZNF101  | zf-C2H2   | 4 | 8  | 10 |
| 292 | ENSG00000198466 | ZNF587  | zf-C2H2   | 4 | 8  | 10 |
| 293 | ENSG00000168661 | ZNF30   | zf-C2H2   | 4 | 8  | 10 |
| 294 | ENSG00000196418 | ZNF124  | zf-C2H2   | 4 | 8  | 10 |
| 295 | ENSG00000129911 | KLF16   | zf-C2H2   | 4 | 8  | 10 |
| 296 | ENSG00000111087 | GLI1    | zf-C2H2   | 4 | 8  | 10 |
| 297 | ENSG00000117036 | ETV3    | ETS       | 4 | 8  | 9  |
| 298 | ENSG00000120690 | ELF1    | ETS       | 4 | 8  | 9  |
| 299 | ENSG00000167528 | ZNF641  | zf-C2H2   | 4 | 8  | 9  |
| 300 | ENSG00000172845 | SP3     | zf-C2H2   | 4 | 8  | 9  |
| 301 | ENSG00000197020 | ZNF100  | zf-C2H2   | 4 | 8  | 9  |
| 302 | ENSG00000198521 | ZNF43   | zf-C2H2   | 4 | 8  | 9  |
| 303 | ENSG00000230797 | YY2     | zf-C2H2   | 4 | 8  | 9  |
| 304 | ENSG00000025156 | HSF2    | HSF       | 4 | 8  | 9  |
| 305 | ENSG00000149050 | ZNF214  | zf-C2H2   | 4 | 8  | 9  |
| 306 | ENSG00000167635 | ZNF146  | zf-C2H2   | 4 | 8  | 9  |
| 307 | ENSG00000064195 | n_q     | Homeobox  | 4 | 8  | 9  |
| 308 | ENSG00000170345 | FOS     | TF_bZIP   | 4 | 8  | 9  |
| 309 | ENSG00000181638 | ZFP41   | zf-C2H2   | 4 | 8  | 8  |
| 310 | ENSG00000010818 | HIVEP2  | zf-C2H2   | 4 | 8  | 8  |
| 311 | ENSG00000100281 | HMGXB4  | HMG       | 4 | 9  | 12 |
| 312 | ENSG00000006194 | ZNF263  | zf-C2H2   | 4 | 9  | 12 |
| 313 | ENSG00000177853 | ZNF518A | zf-C2H2   | 4 | 9  | 11 |
| 314 | ENSG00000077092 | RARB    | THR-like  | 4 | 9  | 11 |
| 315 | ENSG00000168152 | THAP9   | THAP      | 4 | 9  | 11 |
| 316 | ENSG00000170802 | FOXN2   | Fork_head | 4 | 9  | 11 |
| 317 | ENSG00000158691 | ZSCAN12 | zf-C2H2   | 4 | 9  | 11 |
| 318 | ENSG00000029639 | TFB1M   | Others    | 4 | 9  | 11 |
| 319 | ENSG00000070444 | MNT     | bHLH      | 4 | 9  | 11 |
| 320 | ENSG00000197362 | ZNF786  | zf-C2H2   | 4 | 9  | 11 |
| 321 | ENSG00000110925 | CSRNP2  | CSRNP_N   | 4 | 9  | 10 |
| 322 | ENSG00000033800 | PIAS1   | zf-MIZ    | 4 | 9  | 10 |
| 323 | ENSG00000048405 | ZNF800  | zf-C2H2   | 4 | 9  | 10 |
| 324 | ENSG00000049618 | ARID1B  | ARID      | 4 | 9  | 10 |
| 325 | ENSG00000084093 | REST    | zf-C2H2   | 4 | 9  | 10 |
| 326 | ENSG00000123268 | ATF1    | TF_bZIP   | 4 | 9  | 10 |
| 327 | ENSG00000124459 | ZNF45   | zf-C2H2   | 4 | 9  | 10 |
| 328 | ENSG00000126767 | ELK1    | ETS       | 4 | 9  | 10 |
| 329 | ENSG00000171940 | ZNF217  | zf-C2H2   | 4 | 9  | 10 |
| 330 | ENSG00000177311 | ZBTB38  | ZBTB      | 4 | 9  | 10 |
| 331 | ENSG00000185591 | SP1     | zf-C2H2   | 4 | 9  | 10 |
| 332 | ENSG00000196628 | TCF4    | bHLH      | 4 | 9  | 10 |
| 333 | ENSG00000198464 | ZNF480  | zf-C2H2   | 4 | 9  | 10 |
| 334 | ENSG00000198551 | ZNF627  | zf-C2H2   | 4 | 9  | 10 |
| 335 | ENSG00000215421 | ZNF407  | zf-C2H2   | 4 | 9  | 10 |
| 336 | ENSG00000101544 | ADNP2   | Others    | 4 | 9  | 10 |
| 337 | ENSG00000103449 | SALL1   | zf-C2H2   | 4 | 9  | 10 |
| 338 | ENSG00000196437 | ZNF569  | zf-C2H2   | 4 | 9  | 10 |
| 339 | ENSG00000197128 | ZNF772  | zf-C2H2   | 4 | 9  | 10 |
| 340 | ENSG00000074047 | GLI2    | zf-C2H2   | 4 | 9  | 10 |
| 341 | ENSG00000128000 | ZNF780B | zf-C2H2   | 4 | 9  | 10 |
| 342 | ENSG00000142528 | ZNF473  | zf-C2H2   | 4 | 9  | 10 |
| 343 | ENSG00000172789 | HOXC5   | Homeobox  | 4 | 9  | 10 |
| 344 | ENSG00000167182 | SP2     | zf-C2H2   | 4 | 9  | 9  |
| 345 | ENSG00000147124 | ZNF41   | zf-C2H2   | 4 | 9  | 9  |
| 346 | ENSG00000178163 | ZNF518B | zf-C2H2   | 4 | 9  | 9  |
| 347 | ENSG00000180357 | ZNF609  | Others    | 4 | 9  | 9  |
| 348 | ENSG00000196110 | ZNF699  | zf-C2H2   | 4 | 9  | 9  |
| 349 | ENSG00000198346 | ZNF813  | zf-C2H2   | 4 | 9  | 9  |
| 350 | ENSG00000198815 | FOXJ3   | Fork_head | 4 | 9  | 9  |
| 351 | ENSG00000104064 | GABBP1  | Others    | 4 | 9  | 9  |
| 352 | ENSG00000106052 | TAX1BP1 | Others    | 4 | 9  | 9  |
| 353 | ENSG00000115415 | STAT1   | STAT      | 4 | 9  | 9  |
| 354 | ENSG00000120093 | HOXB3   | Homeobox  | 4 | 9  | 9  |
| 355 | ENSG00000137871 | ZNF280D | Others    | 4 | 9  | 9  |
| 356 | ENSG00000170448 | NFXL1   | zf-NF-X1  | 4 | 9  | 9  |
| 357 | ENSG00000204524 | ZNF805  | zf-C2H2   | 4 | 9  | 9  |
| 358 | ENSG00000070476 | ZXDC    | zf-C2H2   | 4 | 9  | 8  |
| 359 | ENSG00000100644 | HIF1A   | Others    | 4 | 9  | 8  |
| 360 | ENSG00000120693 | SMAD9   | MH1       | 4 | 9  | 8  |
| 361 | ENSG00000165259 | HDX     | Homeobox  | 4 | 9  | 8  |
| 362 | ENSG00000171970 | ZNF57   | zf-C2H2   | 4 | 9  | 8  |
| 363 | ENSG00000056277 | ZNF280C | Others    | 4 | 9  | 7  |
| 364 | ENSG00000118620 | ZNF430  | zf-C2H2   | 4 | 9  | 7  |
| 365 | ENSG00000010539 | ZNF200  | zf-C2H2   | 4 | 10 | 11 |
| 366 | ENSG00000054267 | ARID4B  | ARID      | 4 | 10 | 11 |
| 367 | ENSG00000078246 | TULP3   | Tab       | 4 | 10 | 11 |
| 368 | ENSG00000113658 | SMAD5   | MH1       | 4 | 10 | 11 |
| 369 | ENSG00000142556 | ZNF614  | zf-C2H2   | 4 | 10 | 11 |
| 370 | ENSG00000102034 | ELF4    | ETS       | 4 | 10 | 11 |
| 371 | ENSG00000050344 | NFE2L3  | TF_bZIP   | 4 | 10 | 11 |
| 372 | ENSG00000100426 | ZBED4   | zf-BED    | 4 | 10 | 10 |
| 373 | ENSG00000121417 | ZNF211  | zf-C2H2   | 4 | 10 | 10 |

|     |                 |          |          |   |    |    |
|-----|-----------------|----------|----------|---|----|----|
| 374 | ENSG00000152443 | ZNF776   | zf-C2H2  | 4 | 10 | 10 |
| 375 | ENSG00000167384 | ZNF180   | zf-C2H2  | 4 | 10 | 10 |
| 376 | ENSG00000100625 | SIX4     | Homeobox | 4 | 10 | 10 |
| 377 | ENSG00000146757 | ZNF92    | zf-C2H2  | 4 | 10 | 10 |
| 378 | ENSG00000159140 | SON      | Others   | 4 | 10 | 10 |
| 379 | ENSG00000077150 | NFKB2    | RHD      | 4 | 10 | 10 |
| 380 | ENSG00000170561 | IRX2     | Homeobox | 4 | 10 | 10 |
| 381 | ENSG00000085274 | MYNN     | ZBTB     | 4 | 10 | 9  |
| 382 | ENSG00000120075 | HOXB5    | Homeobox | 4 | 10 | 9  |
| 383 | ENSG00000171606 | ZNF274   | zf-C2H2  | 4 | 10 | 9  |
| 384 | ENSG00000182986 | ZNF320   | zf-C2H2  | 4 | 10 | 9  |
| 385 | ENSG00000198026 | ZNF335   | zf-C2H2  | 4 | 10 | 9  |
| 386 | ENSG00000275004 | ZNF280B  | Others   | 4 | 10 | 9  |
| 387 | ENSG00000106546 | AHR      | bHLH     | 4 | 10 | 9  |
| 388 | ENSG00000136866 | ZFP37    | zf-C2H2  | 4 | 10 | 9  |
| 389 | ENSG00000167785 | ZNF558   | zf-C2H2  | 4 | 10 | 9  |
| 390 | ENSG00000174963 | ZIC4     | zf-C2H2  | 4 | 10 | 9  |
| 391 | ENSG00000198963 | RORB     | THR-like | 4 | 10 | 9  |
| 392 | ENSG00000101126 | ADNP     | Homeobox | 4 | 10 | 8  |
| 393 | ENSG00000147118 | ZNF182   | zf-C2H2  | 4 | 10 | 8  |
| 394 | ENSG00000176542 | USF3     | bHLH     | 4 | 10 | 8  |
| 395 | ENSG00000036549 | n_a      | MYB      | 4 | 10 | 8  |
| 396 | ENSG00000168813 | ZNF507   | zf-C2H2  | 4 | 10 | 8  |
| 397 | ENSG00000170322 | NFRKB    | Others   | 4 | 10 | 8  |
| 398 | ENSG00000177463 | NR2C2    | RXR-like | 4 | 10 | 8  |
| 399 | ENSG00000117713 | ARID1A   | ARID     | 4 | 10 | 7  |
| 400 | ENSG00000140382 | HMG20A   | HMG      | 4 | 10 | 7  |
| 401 | ENSG00000263001 | GTF2I    | GTF2I    | 4 | 10 | 7  |
| 402 | ENSG00000174796 | THAP6    | THAP     | 4 | 11 | 11 |
| 403 | ENSG00000177888 | ZBTB41   | ZBTB     | 4 | 11 | 11 |
| 404 | ENSG00000086102 | NFX1     | zf-NF-X1 | 4 | 11 | 10 |
| 405 | ENSG00000155090 | KLF10    | zf-C2H2  | 4 | 11 | 10 |
| 406 | ENSG00000172888 | ZNF621   | zf-C2H2  | 4 | 11 | 10 |
| 407 | ENSG00000188227 | ZNF793   | zf-C2H2  | 4 | 11 | 10 |
| 408 | ENSG00000124201 | ZNFX1    | Others   | 4 | 11 | 9  |
| 409 | ENSG00000117625 | RCOR3    | MYB      | 4 | 11 | 9  |
| 410 | ENSG00000162601 | MYSM1    | MYB      | 4 | 11 | 9  |
| 411 | ENSG00000196417 | ZNF765   | zf-C2H2  | 4 | 11 | 9  |
| 412 | ENSG00000198538 | ZNF28    | zf-C2H2  | 4 | 11 | 9  |
| 413 | ENSG00000152439 | ZNF773   | zf-C2H2  | 4 | 11 | 8  |
| 414 | ENSG00000243678 | NME2     | Others   | 5 | 6  | 10 |
| 415 | ENSG00000105991 | HOXA1    | Homeobox | 5 | 6  | 9  |
| 416 | ENSG00000108509 | CAMTA2   | CG-1     | 5 | 6  | 8  |
| 417 | ENSG00000205250 | E2F4     | E2F      | 5 | 7  | 12 |
| 418 | ENSG00000251369 | ZNF550   | zf-C2H2  | 5 | 7  | 11 |
| 419 | ENSG00000276234 | TADA2A   | MYB      | 5 | 7  | 11 |
| 420 | ENSG00000185869 | ZNF829   | zf-C2H2  | 5 | 7  | 11 |
| 421 | ENSG00000105717 | PBX4     | Homeobox | 5 | 7  | 10 |
| 422 | ENSG00000141002 | TCF25    | Others   | 5 | 7  | 10 |
| 423 | ENSG00000125952 | MAX      | bHLH     | 5 | 7  | 10 |
| 424 | ENSG00000176946 | THAP4    | THAP     | 5 | 7  | 10 |
| 425 | ENSG00000196653 | ZNF502   | zf-C2H2  | 5 | 7  | 10 |
| 426 | ENSG00000178386 | n_a      | zf-C2H2  | 5 | 7  | 9  |
| 427 | ENSG00000155966 | AFF2     | AF-4     | 5 | 7  | 9  |
| 428 | ENSG00000153879 | CEBPG    | TF_bZIP  | 5 | 7  | 9  |
| 429 | ENSG00000197937 | ZNF347   | zf-C2H2  | 5 | 7  | 8  |
| 430 | ENSG00000121406 | ZNF549   | zf-C2H2  | 5 | 7  | 8  |
| 431 | ENSG00000188070 | C11orf95 | zf-BED   | 5 | 7  | 8  |
| 432 | ENSG00000256771 | ZNF253   | zf-C2H2  | 5 | 7  | 7  |
| 433 | ENSG00000105732 | ZNF574   | zf-C2H2  | 5 | 8  | 12 |
| 434 | ENSG00000085276 | MECOM    | zf-C2H2  | 5 | 8  | 11 |
| 435 | ENSG00000122592 | HOXA7    | Homeobox | 5 | 8  | 11 |
| 436 | ENSG00000178187 | ZNF454   | zf-C2H2  | 5 | 8  | 11 |
| 437 | ENSG00000197008 | ZNF138   | zf-C2H2  | 5 | 8  | 11 |
| 438 | ENSG00000136826 | KLF4     | zf-C2H2  | 5 | 8  | 11 |
| 439 | ENSG00000167380 | ZNF226   | zf-C2H2  | 5 | 8  | 11 |
| 440 | ENSG00000178662 | CSRNP3   | CSRNP_N  | 5 | 8  | 10 |
| 441 | ENSG00000169136 | ATF5     | TF_bZIP  | 5 | 8  | 10 |
| 442 | ENSG00000124813 | RUNX2    | Runt     | 5 | 8  | 9  |
| 443 | ENSG00000124613 | ZNF391   | zf-C2H2  | 5 | 8  | 9  |
| 444 | ENSG00000119725 | ZNF410   | zf-C2H2  | 5 | 8  | 9  |
| 445 | ENSG00000125812 | GZF1     | ZBTB     | 5 | 8  | 9  |
| 446 | ENSG00000169554 | ZEB2     | zf-C2H2  | 5 | 8  | 8  |
| 447 | ENSG00000136770 | DNAJC1   | MYB      | 5 | 8  | 8  |
| 448 | ENSG00000180884 | ZNF792   | zf-C2H2  | 5 | 8  | 8  |
| 449 | ENSG00000186376 | ZNF75D   | zf-C2H2  | 5 | 8  | 8  |
| 450 | ENSG00000130856 | ZNF236   | zf-C2H2  | 5 | 8  | 7  |
| 451 | ENSG00000113716 | HMGXB3   | HMG      | 5 | 8  | 6  |
| 452 | ENSG00000064961 | HMG20B   | HMG      | 5 | 9  | 11 |
| 453 | ENSG00000132024 | CC2D1A   | Others   | 5 | 9  | 11 |
| 454 | ENSG00000203326 | ZNF525   | zf-C2H2  | 5 | 9  | 11 |
| 455 | ENSG00000196263 | ZNF471   | zf-C2H2  | 5 | 9  | 10 |
| 456 | ENSG00000065029 | ZNF76    | zf-C2H2  | 5 | 9  | 10 |
| 457 | ENSG00000169083 | AR       | ESR-like | 5 | 9  | 10 |
| 458 | ENSG00000188095 | MESP2    | bHLH     | 5 | 9  | 10 |
| 459 | ENSG00000158773 | USF1     | bHLH     | 5 | 9  | 10 |
| 460 | ENSG00000167967 | E4F1     | zf-C2H2  | 5 | 9  | 10 |
| 461 | ENSG00000060138 | YBX3     | CSD      | 5 | 9  | 10 |
| 462 | ENSG00000083838 | ZNF446   | zf-C2H2  | 5 | 9  | 10 |
| 463 | ENSG00000106459 | NRF1     | Nrf1     | 5 | 9  | 10 |
| 464 | ENSG00000130818 | ZNF426   | zf-C2H2  | 5 | 9  | 10 |
| 465 | ENSG00000078403 | MLLT10   | Others   | 5 | 9  | 9  |
| 466 | ENSG00000157657 | ZNF618   | zf-C2H2  | 5 | 9  | 9  |
| 467 | ENSG00000158711 | ELK4     | ETS      | 5 | 9  | 9  |

|     |                 |         |           |   |    |    |
|-----|-----------------|---------|-----------|---|----|----|
| 468 | ENSG00000213676 | ATF6B   | TF_bZIP   | 5 | 9  | 9  |
| 469 | ENSG00000121864 | ZNF639  | zf-C2H2   | 5 | 9  | 9  |
| 470 | ENSG00000173041 | ZNF680  | zf-C2H2   | 5 | 9  | 9  |
| 471 | ENSG00000120963 | ZNF706  | Others    | 5 | 9  | 9  |
| 472 | ENSG00000166888 | STAT6   | STAT      | 5 | 9  | 8  |
| 473 | ENSG00000177599 | ZNF491  | zf-C2H2   | 5 | 9  | 8  |
| 474 | ENSG00000178764 | ZHX2    | Homeobox  | 5 | 9  | 8  |
| 475 | ENSG00000181315 | ZNF322  | zf-C2H2   | 5 | 9  | 8  |
| 476 | ENSG00000198455 | ZXDB    | zf-C2H2   | 5 | 9  | 8  |
| 477 | ENSG00000272602 | ZNF595  | zf-C2H2   | 5 | 9  | 8  |
| 478 | ENSG00000182318 | ZSCAN22 | zf-C2H2   | 5 | 9  | 8  |
| 479 | ENSG00000102870 | ZNF629  | zf-C2H2   | 5 | 9  | 8  |
| 480 | ENSG00000196453 | ZNF777  | zf-C2H2   | 5 | 9  | 8  |
| 481 | ENSG00000233608 | TWIST2  | bHLH      | 5 | 9  | 8  |
| 482 | ENSG00000144747 | TMF1    | Others    | 5 | 9  | 7  |
| 483 | ENSG00000184677 | ZBTB40  | ZBTB      | 5 | 9  | 7  |
| 484 | ENSG00000116731 | PRDM2   | zf-C2H2   | 5 | 9  | 7  |
| 485 | ENSG00000185551 | NR2F2   | RXR-like  | 5 | 9  | 7  |
| 486 | ENSG00000181220 | ZNF746  | zf-C2H2   | 5 | 10 | 11 |
| 487 | ENSG00000186300 | ZNF555  | zf-C2H2   | 5 | 10 | 11 |
| 488 | ENSG00000167840 | ZNF232  | zf-C2H2   | 5 | 10 | 11 |
| 489 | ENSG00000171574 | ZNF584  | zf-C2H2   | 5 | 10 | 11 |
| 490 | ENSG00000170325 | PRDM10  | zf-C2H2   | 5 | 10 | 10 |
| 491 | ENSG00000186564 | FOXD2   | Fork_head | 5 | 10 | 10 |
| 492 | ENSG00000214029 | ZNF891  | zf-C2H2   | 5 | 10 | 10 |
| 493 | ENSG00000181894 | ZNF329  | zf-C2H2   | 5 | 10 | 10 |
| 494 | ENSG00000187626 | ZKSCAN4 | zf-C2H2   | 5 | 10 | 10 |
| 495 | ENSG00000198546 | ZNF511  | Others    | 5 | 10 | 10 |
| 496 | ENSG00000221923 | ZNF880  | zf-C2H2   | 5 | 10 | 10 |
| 497 | ENSG00000072364 | AFF4    | AF-4      | 5 | 10 | 9  |
| 498 | ENSG00000104447 | TRPS1   | zf-GATA   | 5 | 10 | 9  |
| 499 | ENSG00000118495 | PLAGL1  | zf-C2H2   | 5 | 10 | 9  |
| 500 | ENSG00000151612 | ZNF827  | zf-C2H2   | 5 | 10 | 9  |
| 501 | ENSG00000183309 | ZNF623  | zf-C2H2   | 5 | 10 | 9  |
| 502 | ENSG00000123411 | IKZF4   | zf-C2H2   | 5 | 10 | 9  |
| 503 | ENSG00000134107 | BHLHE40 | bHLH      | 5 | 10 | 9  |
| 504 | ENSG00000155545 | MIER3   | MYB       | 5 | 10 | 9  |
| 505 | ENSG00000177045 | SIX5    | Homeobox  | 5 | 10 | 9  |
| 506 | ENSG00000196705 | ZNF431  | zf-C2H2   | 5 | 10 | 9  |
| 507 | ENSG00000198169 | ZNF251  | zf-C2H2   | 5 | 10 | 9  |
| 508 | ENSG00000078043 | PIAS2   | zf-MIZ    | 5 | 10 | 9  |
| 509 | ENSG00000120784 | ZFP30   | zf-C2H2   | 5 | 10 | 9  |
| 510 | ENSG00000175879 | HOXD8   | Homeobox  | 5 | 10 | 9  |
| 511 | ENSG00000235109 | ZSCAN31 | zf-C2H2   | 5 | 10 | 9  |
| 512 | ENSG00000109381 | ELF2    | ETS       | 5 | 10 | 8  |
| 513 | ENSG00000123636 | BAZ2B   | MBD       | 5 | 10 | 8  |
| 514 | ENSG00000165156 | ZHX1    | Homeobox  | 5 | 10 | 8  |
| 515 | ENSG00000185129 | PURA    | Others    | 5 | 10 | 8  |
| 516 | ENSG00000188786 | MTF1    | zf-C2H2   | 5 | 10 | 8  |
| 517 | ENSG00000189042 | ZNF567  | zf-C2H2   | 5 | 10 | 8  |
| 518 | ENSG00000095574 | IKZF5   | zf-C2H2   | 5 | 10 | 8  |
| 519 | ENSG00000102804 | TSC22D1 | TSC22     | 5 | 10 | 8  |
| 520 | ENSG00000126804 | ZBTB1   | ZBTB      | 5 | 10 | 8  |
| 521 | ENSG00000138738 | PRDM5   | zf-C2H2   | 5 | 10 | 8  |
| 522 | ENSG00000162086 | ZNF75A  | zf-C2H2   | 5 | 10 | 8  |
| 523 | ENSG00000180626 | ZNF594  | zf-C2H2   | 5 | 10 | 8  |
| 524 | ENSG00000196428 | TSC22D2 | TSC22     | 5 | 10 | 8  |
| 525 | ENSG00000197841 | ZNF181  | zf-C2H2   | 5 | 10 | 8  |
| 526 | ENSG00000140265 | ZSCAN29 | zf-C2H2   | 5 | 10 | 8  |
| 527 | ENSG00000166478 | ZNF143  | zf-C2H2   | 5 | 10 | 8  |
| 528 | ENSG00000197647 | ZNF433  | zf-C2H2   | 5 | 10 | 8  |
| 529 | ENSG00000160908 | ZNF394  | zf-C2H2   | 5 | 10 | 8  |
| 530 | ENSG00000141646 | SMAD4   | MH1       | 5 | 10 | 7  |
| 531 | ENSG00000169926 | KLF13   | zf-C2H2   | 5 | 10 | 7  |
| 532 | ENSG00000198146 | ZNF770  | zf-C2H2   | 5 | 10 | 7  |
| 533 | ENSG00000115966 | ATF2    | TF_bZIP   | 5 | 10 | 7  |
| 534 | ENSG00000131845 | ZNF304  | zf-C2H2   | 5 | 10 | 7  |
| 535 | ENSG00000148516 | ZEB1    | zf-C2H2   | 5 | 10 | 7  |
| 536 | ENSG00000163848 | ZNF148  | zf-C2H2   | 5 | 10 | 7  |
| 537 | ENSG00000196693 | ZNF33B  | zf-C2H2   | 5 | 10 | 7  |
| 538 | ENSG00000176024 | ZNF613  | zf-C2H2   | 5 | 10 | 7  |
| 539 | ENSG00000180855 | ZNF443  | zf-C2H2   | 5 | 10 | 7  |
| 540 | ENSG00000197372 | ZNF675  | zf-C2H2   | 5 | 10 | 7  |
| 541 | ENSG00000095951 | HIVEP1  | zf-C2H2   | 5 | 10 | 6  |
| 542 | ENSG00000114439 | BBX     | HMG       | 5 | 10 | 6  |
| 543 | ENSG00000198160 | MIER1   | MYB       | 5 | 10 | 6  |
| 544 | ENSG00000135164 | DMTF1   | MYB       | 5 | 10 | 6  |
| 545 | ENSG00000213020 | ZNF611  | zf-C2H2   | 5 | 11 | 11 |
| 546 | ENSG00000131849 | ZNF132  | zf-C2H2   | 5 | 11 | 11 |
| 547 | ENSG00000175787 | ZNF169  | zf-C2H2   | 5 | 11 | 11 |
| 548 | ENSG00000138380 | CARF    | Others    | 5 | 11 | 10 |
| 549 | ENSG00000173276 | ZBTB21  | ZBTB      | 5 | 11 | 10 |
| 550 | ENSG00000076108 | BAZ2A   | MBD       | 5 | 11 | 9  |
| 551 | ENSG00000116580 | GON4L   | Others    | 5 | 11 | 9  |
| 552 | ENSG00000121903 | ZSCAN20 | zf-C2H2   | 5 | 11 | 9  |
| 553 | ENSG00000196357 | ZNF565  | zf-C2H2   | 5 | 11 | 9  |
| 554 | ENSG00000197497 | ZNF665  | zf-C2H2   | 5 | 11 | 9  |
| 555 | ENSG00000197782 | ZNF780A | zf-C2H2   | 5 | 11 | 9  |
| 556 | ENSG00000081386 | ZNF510  | zf-C2H2   | 5 | 11 | 9  |
| 557 | ENSG00000102908 | NFAT5   | RHD       | 5 | 11 | 9  |
| 558 | ENSG00000122482 | ZNF644  | zf-C2H2   | 5 | 11 | 9  |
| 559 | ENSG00000174197 | MGA     | T-box     | 5 | 11 | 9  |
| 560 | ENSG00000177683 | THAP5   | THAP      | 5 | 11 | 9  |
| 561 | ENSG00000178338 | ZNF354B | zf-C2H2   | 5 | 11 | 9  |

|     |                 |         |          |   |    |    |
|-----|-----------------|---------|----------|---|----|----|
| 562 | ENSG00000179195 | ZNF664  | zf-C2H2  | 5 | 11 | 9  |
| 563 | ENSG00000186814 | ZSCAN30 | zf-C2H2  | 5 | 11 | 9  |
| 564 | ENSG00000196268 | ZNF493  | zf-C2H2  | 5 | 11 | 9  |
| 565 | ENSG00000204604 | ZNF468  | zf-C2H2  | 5 | 11 | 9  |
| 566 | ENSG00000089902 | RCOR1   | MYB      | 5 | 11 | 8  |
| 567 | ENSG00000118260 | CREB1   | TF_bZIP  | 5 | 11 | 8  |
| 568 | ENSG00000161551 | ZNF577  | zf-C2H2  | 5 | 11 | 7  |
| 569 | ENSG00000109320 | NFKB1   | RHD      | 5 | 11 | 7  |
| 570 | ENSG00000115568 | ZNF142  | zf-C2H2  | 5 | 11 | 7  |
| 571 | ENSG00000124782 | RREB1   | zf-C2H2  | 5 | 11 | 7  |
| 572 | ENSG00000168769 | TET2    | Others   | 5 | 11 | 7  |
| 573 | ENSG00000256294 | ZNF225  | zf-C2H2  | 5 | 11 | 7  |
| 574 | ENSG00000177932 | ZNF354C | zf-C2H2  | 5 | 11 | 6  |
| 575 | ENSG00000133794 | ARNTL   | bHLH     | 5 | 12 | 8  |
| 576 | ENSG00000154727 | GABPA   | ETS      | 5 | 12 | 8  |
| 577 | ENSG00000156030 | ELMSAN1 | Others   | 5 | 12 | 8  |
| 578 | ENSG00000186951 | PPARA   | THR-like | 5 | 12 | 8  |
| 579 | ENSG00000197779 | ZNF81   | zf-C2H2  | 5 | 12 | 8  |
| 580 | ENSG00000106006 | HOXA6   | Homeobox | 5 | 12 | 6  |
| 581 | ENSG00000196267 | ZNF836  | zf-C2H2  | 6 | 7  | 8  |
| 582 | ENSG00000159086 | PAXBP1  | GCFC     | 6 | 7  | 8  |
| 583 | ENSG00000227124 | ZNF717  | zf-C2H2  | 6 | 7  | 8  |
| 584 | ENSG00000165684 | SNAPC4  | MYB      | 6 | 8  | 11 |
| 585 | ENSG00000100105 | PATZ1   | ZBTB     | 6 | 8  | 10 |
| 586 | ENSG00000166261 | ZNF202  | zf-C2H2  | 6 | 8  | 10 |
| 587 | ENSG00000187815 | ZFP69   | zf-C2H2  | 6 | 8  | 10 |
| 588 | ENSG00000176222 | ZNF404  | zf-C2H2  | 6 | 8  | 9  |
| 589 | ENSG00000125826 | RBCK1   | Others   | 6 | 8  | 8  |
| 590 | ENSG00000197050 | ZNF420  | zf-C2H2  | 6 | 8  | 8  |
| 591 | ENSG00000096654 | ZNF184  | zf-C2H2  | 6 | 8  | 8  |
| 592 | ENSG00000186017 | ZNF566  | zf-C2H2  | 6 | 8  | 8  |
| 593 | ENSG00000079432 | CIC     | HMG      | 6 | 8  | 7  |
| 594 | ENSG00000186272 | ZNF17   | zf-C2H2  | 6 | 8  | 7  |
| 595 | ENSG00000178935 | ZNF552  | zf-C2H2  | 6 | 8  | 6  |
| 596 | ENSG00000166925 | TSC22D4 | TSC2     | 6 | 9  | 11 |
| 597 | ENSG00000109705 | NKX3-2  | Homeobox | 6 | 9  | 11 |
| 598 | ENSG00000221994 | ZNF630  | zf-C2H2  | 6 | 9  | 10 |
| 599 | ENSG00000189190 | ZNF600  | zf-C2H2  | 6 | 9  | 10 |
| 600 | ENSG00000196172 | ZNF681  | zf-C2H2  | 6 | 9  | 10 |
| 601 | ENSG00000123388 | HOXC11  | Homeobox | 6 | 9  | 10 |
| 602 | ENSG00000064490 | RFANK   | Others   | 6 | 9  | 9  |
| 603 | ENSG00000256087 | ZNF432  | zf-C2H2  | 6 | 9  | 9  |
| 604 | ENSG00000151500 | THYN1   | Others   | 6 | 9  | 9  |
| 605 | ENSG00000169016 | E2F6    | E2F      | 6 | 9  | 9  |
| 606 | ENSG00000171443 | ZNF524  | zf-C2H2  | 6 | 9  | 9  |
| 607 | ENSG00000174332 | GLIS1   | zf-C2H2  | 6 | 9  | 9  |
| 608 | ENSG00000188290 | HES4    | bHLH     | 6 | 9  | 9  |
| 609 | ENSG00000198205 | ZXDA    | zf-C2H2  | 6 | 9  | 9  |
| 610 | ENSG00000179528 | LBX2    | Homeobox | 6 | 9  | 9  |
| 611 | ENSG00000127528 | KLF2    | zf-C2H2  | 6 | 9  | 9  |
| 612 | ENSG00000163795 | ZNF513  | zf-C2H2  | 6 | 9  | 9  |
| 613 | ENSG00000169946 | ZFPM2   | zf-C2H2  | 6 | 9  | 9  |
| 614 | ENSG00000180818 | HOXC10  | Homeobox | 6 | 9  | 8  |
| 615 | ENSG00000185278 | ZBTB37  | ZBTB     | 6 | 9  | 8  |
| 616 | ENSG00000198795 | ZNF521  | zf-C2H2  | 6 | 9  | 8  |
| 617 | ENSG00000183621 | ZNF438  | zf-C2H2  | 6 | 9  | 8  |
| 618 | ENSG00000179632 | MAF1    | Others   | 6 | 9  | 8  |
| 619 | ENSG00000167625 | ZNF526  | zf-C2H2  | 6 | 9  | 8  |
| 620 | ENSG00000170260 | ZNF212  | zf-C2H2  | 6 | 9  | 8  |
| 621 | ENSG00000187098 | MITF    | bHLH     | 6 | 9  | 8  |
| 622 | ENSG0000018869  | ZNF582  | zf-C2H2  | 6 | 9  | 8  |
| 623 | ENSG00000106571 | GLI3    | zf-C2H2  | 6 | 9  | 8  |
| 624 | ENSG00000106948 | AKNA    | Others   | 6 | 9  | 7  |
| 625 | ENSG00000147789 | ZNF7    | zf-C2H2  | 6 | 9  | 7  |
| 626 | ENSG00000197062 | ZSCAN26 | zf-C2H2  | 6 | 9  | 7  |
| 627 | ENSG00000062194 | GPBP1   | Others   | 6 | 9  | 7  |
| 628 | ENSG00000196466 | ZNF799  | zf-C2H2  | 6 | 9  | 7  |
| 629 | ENSG00000171163 | ZNF692  | zf-C2H2  | 6 | 9  | 7  |
| 630 | ENSG00000066827 | ZFAT    | zf-C2H2  | 6 | 9  | 7  |
| 631 | ENSG00000213096 | ZNF254  | zf-C2H2  | 6 | 9  | 6  |
| 632 | ENSG00000181690 | PLAG1   | zf-C2H2  | 6 | 9  | 6  |
| 633 | ENSG00000173545 | ZNF622  | zf-C2H2  | 6 | 9  | 6  |
| 634 | ENSG00000132604 | TERF2   | MYB      | 6 | 10 | 10 |
| 635 | ENSG00000237440 | n_a     | zf-C2H2  | 6 | 10 | 10 |
| 636 | ENSG00000265763 | ZNF488  | Others   | 6 | 10 | 10 |
| 637 | ENSG00000103495 | MAZ     | zf-C2H2  | 6 | 10 | 10 |
| 638 | ENSG00000124444 | ZNF576  | zf-C2H2  | 6 | 10 | 10 |
| 639 | ENSG00000178860 | MSC     | bHLH     | 6 | 10 | 10 |
| 640 | ENSG00000164048 | ZNF589  | zf-C2H2  | 6 | 10 | 10 |
| 641 | ENSG00000133740 | E2F5    | E2F      | 6 | 10 | 10 |
| 642 | ENSG00000171295 | ZNF440  | zf-C2H2  | 6 | 10 | 9  |
| 643 | ENSG00000122034 | GTF3A   | zf-C2H2  | 6 | 10 | 9  |
| 644 | ENSG00000130803 | ZNF317  | zf-C2H2  | 6 | 10 | 9  |
| 645 | ENSG00000168779 | SHOX2   | Homeobox | 6 | 10 | 9  |
| 646 | ENSG00000169740 | ZNF32   | zf-C2H2  | 6 | 10 | 9  |
| 647 | ENSG00000105136 | ZNF419  | zf-C2H2  | 6 | 10 | 9  |
| 648 | ENSG00000175213 | ZNF408  | zf-C2H2  | 6 | 10 | 9  |
| 649 | ENSG00000176472 | ZNF575  | zf-C2H2  | 6 | 10 | 9  |
| 650 | ENSG00000108813 | DLX4    | Homeobox | 6 | 10 | 9  |
| 651 | ENSG00000137185 | ZSCAN9  | zf-C2H2  | 6 | 10 | 9  |
| 652 | ENSG00000104177 | MYEF2   | Others   | 6 | 10 | 8  |
| 653 | ENSG00000112033 | PPARD   | THR-like | 6 | 10 | 8  |
| 654 | ENSG00000186130 | ZBTB6   | ZBTB     | 6 | 10 | 8  |
| 655 | ENSG00000196646 | ZNF136  | zf-C2H2  | 6 | 10 | 8  |

|     |                 |                 |          |   |    |    |
|-----|-----------------|-----------------|----------|---|----|----|
| 656 | ENSG00000213999 | <i>n_a</i>      | SRF      | 6 | 10 | 8  |
| 657 | ENSG00000142409 | <i>ZNF787</i>   | zf-C2H2  | 6 | 10 | 8  |
| 658 | ENSG00000152518 | <i>ZFP36L2</i>  | zf-CCCH  | 6 | 10 | 8  |
| 659 | ENSG00000243943 | <i>ZNF512</i>   | zf-C2H2  | 6 | 10 | 8  |
| 660 | ENSG00000126003 | <i>PLAGL2</i>   | zf-C2H2  | 6 | 10 | 8  |
| 661 | ENSG00000037965 | <i>n_a</i>      | Homeobox | 6 | 10 | 8  |
| 662 | ENSG00000185650 | <i>ZFP36L1</i>  | zf-CCCH  | 6 | 10 | 8  |
| 663 | ENSG00000137504 | <i>CREBZF</i>   | TF_bZIP  | 6 | 10 | 7  |
| 664 | ENSG00000170653 | <i>ATF7</i>     | TF_bZIP  | 6 | 10 | 7  |
| 665 | ENSG00000142611 | <i>PRDM16</i>   | zf-C2H2  | 6 | 10 | 7  |
| 666 | ENSG00000172059 | <i>KLF11</i>    | zf-C2H2  | 6 | 10 | 7  |
| 667 | ENSG00000197013 | <i>ZNF429</i>   | zf-C2H2  | 6 | 10 | 7  |
| 668 | ENSG00000105672 | <i>ETV2</i>     | ETS      | 6 | 10 | 7  |
| 669 | ENSG00000176887 | <i>SOX11</i>    | HMG      | 6 | 10 | 7  |
| 670 | ENSG00000177030 | <i>DEAF1</i>    | SAND     | 6 | 10 | 7  |
| 671 | ENSG00000068305 | <i>MEF2A</i>    | SRF      | 6 | 10 | 6  |
| 672 | ENSG00000139613 | <i>SMARCC2</i>  | MYB      | 6 | 10 | 6  |
| 673 | ENSG00000177125 | <i>ZBTB34</i>   | ZBTB     | 6 | 10 | 6  |
| 674 | ENSG00000105866 | <i>SP4</i>      | zf-C2H2  | 6 | 10 | 6  |
| 675 | ENSG00000137203 | <i>TFAP2A</i>   | AP-2     | 6 | 10 | 6  |
| 676 | ENSG00000198429 | <i>ZNF69</i>    | zf-C2H2  | 6 | 10 | 6  |
| 677 | ENSG00000198105 | <i>ZNF248</i>   | zf-C2H2  | 6 | 10 | 5  |
| 678 | ENSG00000162419 | <i>GMEB1</i>    | SAND     | 6 | 11 | 12 |
| 679 | ENSG00000198945 | <i>L3MBTL3</i>  | Others   | 6 | 11 | 11 |
| 680 | ENSG00000138073 | <i>PREB</i>     | Others   | 6 | 11 | 11 |
| 681 | ENSG00000130544 | <i>ZNF557</i>   | zf-C2H2  | 6 | 11 | 11 |
| 682 | ENSG00000178229 | <i>ZNF543</i>   | zf-C2H2  | 6 | 11 | 10 |
| 683 | ENSG00000164011 | <i>ZNF691</i>   | zf-C2H2  | 6 | 11 | 10 |
| 684 | ENSG00000185122 | <i>HSF1</i>     | HSF      | 6 | 11 | 10 |
| 685 | ENSG00000148337 | <i>CIZ1</i>     | Others   | 6 | 11 | 10 |
| 686 | ENSG00000197044 | <i>ZNF441</i>   | zf-C2H2  | 6 | 11 | 9  |
| 687 | ENSG00000134954 | <i>ETS1</i>     | ETS      | 6 | 11 | 9  |
| 688 | ENSG00000169155 | <i>ZBTB43</i>   | ZBTB     | 6 | 11 | 9  |
| 689 | ENSG00000175105 | <i>ZNF654</i>   | zf-C2H2  | 6 | 11 | 9  |
| 690 | ENSG00000197608 | <i>ZNF841</i>   | zf-C2H2  | 6 | 11 | 9  |
| 691 | ENSG00000245680 | <i>ZNF585B</i>  | zf-C2H2  | 6 | 11 | 9  |
| 692 | ENSG00000136630 | <i>HLX</i>      | Homeobox | 6 | 11 | 9  |
| 693 | ENSG00000159263 | <i>SIM2</i>     | bHLH     | 6 | 11 | 9  |
| 694 | ENSG00000184436 | <i>THAP7</i>    | THAP     | 6 | 11 | 9  |
| 695 | ENSG00000260027 | <i>HOXB7</i>    | Homeobox | 6 | 11 | 9  |
| 696 | ENSG00000069011 | <i>PITX1</i>    | Homeobox | 6 | 11 | 9  |
| 697 | ENSG00000071655 | <i>MBD3</i>     | MBD      | 6 | 11 | 9  |
| 698 | ENSG00000119574 | <i>ZBTB45</i>   | ZBTB     | 6 | 11 | 9  |
| 699 | ENSG00000133937 | <i>GSC</i>      | Homeobox | 6 | 11 | 9  |
| 700 | ENSG00000169957 | <i>ZNF768</i>   | zf-C2H2  | 6 | 11 | 9  |
| 701 | ENSG00000185507 | <i>IRF7</i>     | IRF      | 6 | 11 | 9  |
| 702 | ENSG00000109787 | <i>KLF3</i>     | zf-C2H2  | 6 | 11 | 8  |
| 703 | ENSG00000151702 | <i>FLI1</i>     | ETS      | 6 | 11 | 8  |
| 704 | ENSG00000041988 | <i>THAP3</i>    | THAP     | 6 | 11 | 8  |
| 705 | ENSG00000121297 | <i>TSHZ3</i>    | zf-C2H2  | 6 | 11 | 8  |
| 706 | ENSG00000122778 | <i>KIAA1549</i> | Others   | 6 | 11 | 8  |
| 707 | ENSG00000131115 | <i>ZNF227</i>   | zf-C2H2  | 6 | 11 | 8  |
| 708 | ENSG00000173480 | <i>ZNF417</i>   | zf-C2H2  | 6 | 11 | 8  |
| 709 | ENSG00000180479 | <i>ZNF571</i>   | zf-C2H2  | 6 | 11 | 8  |
| 710 | ENSG00000213015 | <i>ZNF580</i>   | zf-C2H2  | 6 | 11 | 8  |
| 711 | ENSG00000112561 | <i>TFEB</i>     | bHLH     | 6 | 11 | 8  |
| 712 | ENSG00000133250 | <i>ZNF414</i>   | Others   | 6 | 11 | 8  |
| 713 | ENSG00000167685 | <i>ZNF444</i>   | zf-C2H2  | 6 | 11 | 8  |
| 714 | ENSG00000256683 | <i>ZNF350</i>   | zf-C2H2  | 6 | 11 | 8  |
| 715 | ENSG00000157554 | <i>ERG</i>      | ETS      | 6 | 11 | 8  |
| 716 | ENSG00000223547 | <i>ZNF844</i>   | zf-C2H2  | 6 | 11 | 8  |
| 717 | ENSG00000107249 | <i>GLIS3</i>    | zf-C2H2  | 6 | 11 | 7  |
| 718 | ENSG00000189079 | <i>ARID2</i>    | ARID     | 6 | 11 | 7  |
| 719 | ENSG00000198185 | <i>ZNF334</i>   | zf-C2H2  | 6 | 11 | 7  |
| 720 | ENSG00000008441 | <i>NFIX</i>     | CTF/NFI  | 6 | 11 | 7  |
| 721 | ENSG00000067066 | <i>SP100</i>    | SAND     | 6 | 11 | 7  |
| 722 | ENSG00000125945 | <i>ZNF436</i>   | zf-C2H2  | 6 | 11 | 7  |
| 723 | ENSG00000134138 | <i>MEIS2</i>    | Homeobox | 6 | 11 | 7  |
| 724 | ENSG00000146587 | <i>RBAK</i>     | zf-C2H2  | 6 | 11 | 7  |
| 725 | ENSG00000167555 | <i>ZNF528</i>   | zf-C2H2  | 6 | 11 | 7  |
| 726 | ENSG00000186812 | <i>ZNF397</i>   | zf-C2H2  | 6 | 11 | 7  |
| 727 | ENSG00000197037 | <i>ZSCAN25</i>  | zf-C2H2  | 6 | 11 | 7  |
| 728 | ENSG00000257591 | <i>ZNF625</i>   | zf-C2H2  | 6 | 11 | 7  |
| 729 | ENSG00000278129 | <i>ZNF8</i>     | zf-C2H2  | 6 | 11 | 7  |
| 730 | ENSG00000178917 | <i>ZNF852</i>   | zf-C2H2  | 6 | 11 | 7  |
| 731 | ENSG00000105856 | <i>HBP1</i>     | HMG      | 6 | 11 | 6  |
| 732 | ENSG00000167232 | <i>ZNF91</i>    | zf-C2H2  | 6 | 11 | 6  |
| 733 | ENSG00000159592 | <i>GPBP1L1</i>  | Others   | 6 | 11 | 6  |
| 734 | ENSG00000100811 | <i>YY1</i>      | zf-C2H2  | 6 | 11 | 5  |
| 735 | ENSG00000139154 | <i>AEBP2</i>    | zf-C2H2  | 6 | 11 | 5  |
| 736 | ENSG00000182568 | <i>SATB1</i>    | CUT      | 6 | 11 | 5  |
| 737 | ENSG00000101190 | <i>TCFL5</i>    | bHLH     | 6 | 11 | 5  |
| 738 | ENSG00000092203 | <i>TOX4</i>     | HMG      | 6 | 12 | 10 |
| 739 | ENSG00000102038 | <i>SMARCA1</i>  | MYB      | 6 | 12 | 9  |
| 740 | ENSG00000063587 | <i>ZNF275</i>   | zf-C2H2  | 6 | 12 | 9  |
| 741 | ENSG00000083844 | <i>ZNF264</i>   | zf-C2H2  | 6 | 12 | 9  |
| 742 | ENSG00000181135 | <i>ZNF707</i>   | zf-C2H2  | 6 | 12 | 9  |
| 743 | ENSG00000032219 | <i>ARID4A</i>   | ARID     | 6 | 12 | 8  |
| 744 | ENSG00000055609 | <i>KMT2C</i>    | HMG      | 6 | 12 | 8  |
| 745 | ENSG00000156273 | <i>BACH1</i>    | TF_bZIP  | 6 | 12 | 8  |
| 746 | ENSG00000168916 | <i>ZNF608</i>   | Others   | 6 | 12 | 8  |
| 747 | ENSG00000196233 | <i>LCOR</i>     | HTH      | 6 | 12 | 8  |
| 748 | ENSG00000197619 | <i>ZNF615</i>   | zf-C2H2  | 6 | 12 | 8  |
| 749 | ENSG00000254004 | <i>ZNF260</i>   | zf-C2H2  | 6 | 12 | 8  |



|     |                 |         |           |   |    |    |
|-----|-----------------|---------|-----------|---|----|----|
| 750 | ENSG00000275111 | ZNF2    | zf-C2H2   | 6 | 12 | 8  |
| 751 | ENSG00000141448 | GATA6   | zf-GATA   | 6 | 12 | 8  |
| 752 | ENSG00000175395 | ZNF25   | zf-C2H2   | 6 | 12 | 8  |
| 753 | ENSG00000169131 | ZNF354A | zf-C2H2   | 6 | 12 | 8  |
| 754 | ENSG00000118263 | KLF7    | zf-C2H2   | 6 | 12 | 7  |
| 755 | ENSG00000213799 | ZNF845  | zf-C2H2   | 6 | 12 | 7  |
| 756 | ENSG00000082641 | NFE2L1  | TF_bZIP   | 6 | 12 | 7  |
| 757 | ENSG00000116016 | EPAS1   | Others    | 6 | 12 | 7  |
| 758 | ENSG00000166402 | TUB     | Tub       | 6 | 12 | 7  |
| 759 | ENSG00000169057 | MECP2   | MBD       | 6 | 12 | 7  |
| 760 | ENSG00000170485 | NPAS2   | bHLH      | 6 | 12 | 7  |
| 761 | ENSG00000173068 | BNC2    | zf-C2H2   | 6 | 12 | 7  |
| 762 | ENSG00000173875 | ZNF791  | zf-C2H2   | 6 | 12 | 7  |
| 763 | ENSG00000225614 | ZNF469  | zf-C2H2   | 6 | 12 | 7  |
| 764 | ENSG00000106261 | ZKSCAN1 | zf-C2H2   | 6 | 12 | 7  |
| 765 | ENSG00000132846 | ZBED3   | zf-BED    | 6 | 12 | 7  |
| 766 | ENSG00000160961 | ZNF333  | zf-C2H2   | 6 | 12 | 7  |
| 767 | ENSG00000179909 | ZNF154  | zf-C2H2   | 6 | 12 | 6  |
| 768 | ENSG00000111269 | CREBL2  | Others    | 6 | 12 | 6  |
| 769 | ENSG00000131127 | ZNF141  | zf-C2H2   | 6 | 12 | 6  |
| 770 | ENSG00000139651 | ZNF740  | zf-C2H2   | 6 | 12 | 6  |
| 771 | ENSG00000167395 | ZNF646  | zf-C2H2   | 6 | 12 | 6  |
| 772 | ENSG00000171469 | ZNF561  | zf-C2H2   | 6 | 12 | 6  |
| 773 | ENSG00000180787 | ZFP3    | zf-C2H2   | 6 | 12 | 6  |
| 774 | ENSG00000188994 | ZNF292  | zf-C2H2   | 6 | 12 | 6  |
| 775 | ENSG00000009307 | CSDE1   | CSD       | 6 | 12 | 5  |
| 776 | ENSG00000081665 | ZNF506  | zf-C2H2   | 6 | 12 | 5  |
| 777 | ENSG00000164463 | CREBRF  | Others    | 6 | 12 | 5  |
| 778 | ENSG00000174306 | ZHX3    | Homeobox  | 6 | 12 | 4  |
| 779 | ENSG00000120149 | MSX2    | Homeobox  | 7 | 7  | 7  |
| 780 | ENSG00000090612 | ZNF268  | zf-C2H2   | 7 | 8  | 10 |
| 781 | ENSG00000006377 | DLX6    | Homeobox  | 7 | 8  | 9  |
| 782 | ENSG00000161298 | ZNF382  | zf-C2H2   | 7 | 8  | 9  |
| 783 | ENSG00000087903 | RFX2    | RFX       | 7 | 8  | 8  |
| 784 | ENSG00000132005 | RFX1    | RFX       | 7 | 8  | 8  |
| 785 | ENSG00000116035 | VAX2    | Homeobox  | 7 | 8  | 6  |
| 786 | ENSG00000116819 | TFAP2E  | AP-2      | 7 | 9  | 11 |
| 787 | ENSG00000169951 | ZNF764  | zf-C2H2   | 7 | 9  | 10 |
| 788 | ENSG00000197483 | ZNF628  | zf-C2H2   | 7 | 9  | 9  |
| 789 | ENSG00000182742 | HOXB4   | Homeobox  | 7 | 9  | 9  |
| 790 | ENSG00000147421 | HMBOX1  | Homeobox  | 7 | 9  | 9  |
| 791 | ENSG00000256223 | ZNF10   | zf-C2H2   | 7 | 9  | 9  |
| 792 | ENSG00000112837 | TBX18   | T-box     | 7 | 9  | 8  |
| 793 | ENSG00000119138 | KLF9    | zf-C2H2   | 7 | 9  | 8  |
| 794 | ENSG00000176293 | ZNF135  | zf-C2H2   | 7 | 9  | 8  |
| 795 | ENSG00000196381 | ZNF781  | zf-C2H2   | 7 | 9  | 8  |
| 796 | ENSG00000144485 | HES6    | bHLH      | 7 | 9  | 8  |
| 797 | ENSG00000152433 | ZNF547  | zf-C2H2   | 7 | 9  | 8  |
| 798 | ENSG00000198556 | ZNF789  | zf-C2H2   | 7 | 9  | 8  |
| 799 | ENSG00000144792 | ZNF660  | zf-C2H2   | 7 | 9  | 7  |
| 800 | ENSG00000197054 | ZNF763  | zf-C2H2   | 7 | 9  | 7  |
| 801 | ENSG00000197935 | ZNF311  | zf-C2H2   | 7 | 9  | 7  |
| 802 | ENSG00000196700 | ZNF512B | zf-C2H2   | 7 | 9  | 6  |
| 803 | ENSG00000202056 | ZFP64   | zf-C2H2   | 7 | 9  | 5  |
| 804 | ENSG00000197757 | HOXC6   | Homeobox  | 7 | 9  | 5  |
| 805 | ENSG00000167637 | ZNF283  | zf-C2H2   | 7 | 10 | 10 |
| 806 | ENSG00000148200 | NR6A1   | GCNF-like | 7 | 10 | 9  |
| 807 | ENSG00000171291 | ZNF439  | zf-C2H2   | 7 | 10 | 9  |
| 808 | ENSG00000198440 | ZNF583  | zf-C2H2   | 7 | 10 | 9  |
| 809 | ENSG00000204304 | PBX2    | Homeobox  | 7 | 10 | 9  |
| 810 | ENSG00000088876 | ZNF343  | zf-C2H2   | 7 | 10 | 9  |
| 811 | ENSG00000128272 | ATF4    | TF_bZIP   | 7 | 10 | 9  |
| 812 | ENSG00000167554 | ZNF610  | zf-C2H2   | 7 | 10 | 9  |
| 813 | ENSG00000177732 | SOX12   | HMG       | 7 | 10 | 9  |
| 814 | ENSG00000129194 | SOX15   | HMG       | 7 | 10 | 9  |
| 815 | ENSG00000188171 | ZNF626  | zf-C2H2   | 7 | 10 | 9  |
| 816 | ENSG00000143373 | ZNF687  | zf-C2H2   | 7 | 10 | 8  |
| 817 | ENSG00000198740 | ZNF652  | zf-C2H2   | 7 | 10 | 8  |
| 818 | ENSG00000019485 | PRDM11  | Others    | 7 | 10 | 8  |
| 819 | ENSG00000078900 | TP73    | P53       | 7 | 10 | 8  |
| 820 | ENSG00000116809 | ZBTB17  | ZBTB      | 7 | 10 | 8  |
| 821 | ENSG00000140836 | ZFHX3   | Homeobox  | 7 | 10 | 8  |
| 822 | ENSG00000166823 | MESP1   | bHLH      | 7 | 10 | 8  |
| 823 | ENSG00000263002 | ZNF234  | zf-C2H2   | 7 | 10 | 8  |
| 824 | ENSG00000154957 | ZNF18   | zf-C2H2   | 7 | 10 | 8  |
| 825 | ENSG00000170549 | IRX1    | Homeobox  | 7 | 10 | 8  |
| 826 | ENSG00000162714 | ZNF496  | zf-C2H2   | 7 | 10 | 8  |
| 827 | ENSG00000162772 | ATF3    | TF_bZIP   | 7 | 10 | 8  |
| 828 | ENSG00000167157 | PRRX2   | Homeobox  | 7 | 10 | 7  |
| 829 | ENSG00000120798 | NR2C1   | RXR-like  | 7 | 10 | 7  |
| 830 | ENSG00000128573 | FOXP2   | Fork_head | 7 | 10 | 7  |
| 831 | ENSG00000136936 | XPA     | Others    | 7 | 10 | 7  |
| 832 | ENSG00000171425 | ZNF581  | zf-C2H2   | 7 | 10 | 7  |
| 833 | ENSG00000151623 | NR3C2   | ESR-like  | 7 | 10 | 7  |
| 834 | ENSG00000179943 | FIZ1    | zf-C2H2   | 7 | 10 | 7  |
| 835 | ENSG00000204103 | MAFB    | TF_bZIP   | 7 | 10 | 7  |
| 836 | ENSG00000204859 | ZBTB48  | ZBTB      | 7 | 10 | 7  |
| 837 | ENSG00000249471 | ZNF324B | zf-C2H2   | 7 | 10 | 7  |
| 838 | ENSG00000083812 | ZNF324  | zf-C2H2   | 7 | 10 | 7  |
| 839 | ENSG00000197951 | ZNF71   | zf-C2H2   | 7 | 10 | 7  |
| 840 | ENSG00000204947 | ZNF425  | zf-C2H2   | 7 | 10 | 7  |
| 841 | ENSG00000185730 | ZNF696  | zf-C2H2   | 7 | 10 | 7  |
| 842 | ENSG00000175197 | DDIT3   | TF_bZIP   | 7 | 10 | 6  |
| 843 | ENSG00000177374 | HIC1    | ZBTB      | 7 | 10 | 6  |

|     |                 |          |           |   |    |    |
|-----|-----------------|----------|-----------|---|----|----|
| 844 | ENSG00000179588 | ZFPM1    | zf-C2H2   | 7 | 10 | 6  |
| 845 | ENSG00000218891 | ZNF579   | zf-C2H2   | 7 | 10 | 6  |
| 846 | ENSG00000130522 | JUND     | TF_bZIP   | 7 | 10 | 6  |
| 847 | ENSG00000161277 | THAP8    | THAP      | 7 | 10 | 6  |
| 848 | ENSG00000174652 | ZNF266   | zf-C2H2   | 7 | 10 | 6  |
| 849 | ENSG00000196967 | ZNF585A  | zf-C2H2   | 7 | 10 | 6  |
| 850 | ENSG00000186020 | ZNF529   | zf-C2H2   | 7 | 10 | 5  |
| 851 | ENSG00000074219 | TEAD2    | TEA       | 7 | 10 | 5  |
| 852 | ENSG00000170577 | SIX2     | Homeobox  | 7 | 10 | 5  |
| 853 | ENSG00000151322 | NPAS3    | bHLH      | 7 | 10 | 4  |
| 854 | ENSG00000167081 | PBX3     | Homeobox  | 7 | 11 | 10 |
| 855 | ENSG00000196387 | ZNF140   | zf-C2H2   | 7 | 11 | 10 |
| 856 | ENSG00000128709 | HOXD9    | Homeobox  | 7 | 11 | 9  |
| 857 | ENSG00000137166 | FOXP4    | Fork_head | 7 | 11 | 9  |
| 858 | ENSG00000157613 | CREB3L1  | TF_bZIP   | 7 | 11 | 9  |
| 859 | ENSG00000197279 | ZNF165   | zf-C2H2   | 7 | 11 | 9  |
| 860 | ENSG00000159885 | ZNF222   | zf-C2H2   | 7 | 11 | 9  |
| 861 | ENSG00000179361 | ARID3B   | ARID      | 7 | 11 | 8  |
| 862 | ENSG00000187079 | TEAD1    | TEA       | 7 | 11 | 8  |
| 863 | ENSG00000198393 | ZNF26    | zf-C2H2   | 7 | 11 | 8  |
| 864 | ENSG00000105516 | DBP      | TF_bZIP   | 7 | 11 | 8  |
| 865 | ENSG00000165821 | SALL2    | zf-C2H2   | 7 | 11 | 8  |
| 866 | ENSG00000168286 | THAP11   | THAP      | 7 | 11 | 8  |
| 867 | ENSG00000173039 | RELA     | RHD       | 7 | 11 | 8  |
| 868 | ENSG00000204611 | ZNF616   | zf-C2H2   | 7 | 11 | 8  |
| 869 | ENSG00000250571 | GLI4     | zf-C2H2   | 7 | 11 | 8  |
| 870 | ENSG00000025434 | NR1H3    | THR-like  | 7 | 11 | 8  |
| 871 | ENSG00000071564 | TCF3     | bHLH      | 7 | 11 | 8  |
| 872 | ENSG00000152475 | ZNF837   | zf-C2H2   | 7 | 11 | 8  |
| 873 | ENSG00000157429 | ZNF19    | zf-C2H2   | 7 | 11 | 8  |
| 874 | ENSG00000249709 | ZNF564   | zf-C2H2   | 7 | 11 | 8  |
| 875 | ENSG00000108312 | UBTF     | HMG       | 7 | 11 | 8  |
| 876 | ENSG00000188629 | ZNF177   | zf-C2H2   | 7 | 11 | 8  |
| 877 | ENSG00000198715 | GLMP     | NCU-G1    | 7 | 11 | 8  |
| 878 | ENSG00000169635 | HIC2     | ZBTB      | 7 | 11 | 8  |
| 879 | ENSG00000152454 | ZNF256   | zf-C2H2   | 7 | 11 | 7  |
| 880 | ENSG00000160336 | ZNF761   | zf-C2H2   | 7 | 11 | 7  |
| 881 | ENSG00000173275 | ZNF449   | zf-C2H2   | 7 | 11 | 7  |
| 882 | ENSG00000185670 | ZBTB3    | ZBTB      | 7 | 11 | 7  |
| 883 | ENSG00000122386 | ZNF205   | zf-C2H2   | 7 | 11 | 7  |
| 884 | ENSG00000125520 | SLC2A4RG | Others    | 7 | 11 | 7  |
| 885 | ENSG00000196391 | ZNF774   | zf-C2H2   | 7 | 11 | 7  |
| 886 | ENSG00000122515 | ZMIZ2    | zf-MIZ    | 7 | 11 | 7  |
| 887 | ENSG00000179922 | ZNF784   | zf-C2H2   | 7 | 11 | 7  |
| 888 | ENSG00000198816 | ZNF358   | zf-C2H2   | 7 | 11 | 7  |
| 889 | ENSG00000172346 | CSDC2    | CSD       | 7 | 11 | 7  |
| 890 | ENSG00000180318 | ALX1     | Homeobox  | 7 | 11 | 7  |
| 891 | ENSG00000182983 | ZNF662   | zf-C2H2   | 7 | 11 | 7  |
| 892 | ENSG00000166454 | ATMIN    | zf-C2H2   | 7 | 11 | 7  |
| 893 | ENSG00000188868 | ZNF563   | zf-C2H2   | 7 | 11 | 6  |
| 894 | ENSG00000113916 | BCL6     | ZBTB      | 7 | 11 | 6  |
| 895 | ENSG00000130751 | NPAS1    | bHLH      | 7 | 11 | 6  |
| 896 | ENSG00000136870 | ZNF189   | zf-C2H2   | 7 | 11 | 6  |
| 897 | ENSG00000160113 | NR2F6    | RXR-like  | 7 | 11 | 6  |
| 898 | ENSG00000166716 | ZNF592   | zf-C2H2   | 7 | 11 | 6  |
| 899 | ENSG00000180806 | n_a      | Homeobox  | 7 | 11 | 6  |
| 900 | ENSG00000229809 | ZNF688   | zf-C2H2   | 7 | 11 | 6  |
| 901 | ENSG00000129071 | MBD4     | MBD       | 7 | 11 | 6  |
| 902 | ENSG00000131408 | n_a      | THR-like  | 7 | 11 | 6  |
| 903 | ENSG00000167394 | ZNF668   | zf-C2H2   | 7 | 11 | 6  |
| 904 | ENSG00000187187 | ZNF546   | zf-C2H2   | 7 | 11 | 6  |
| 905 | ENSG00000267680 | ZNF224   | zf-C2H2   | 7 | 11 | 6  |
| 906 | ENSG0000020633  | RUNX3    | Runt      | 7 | 11 | 6  |
| 907 | ENSG00000164920 | OSR2     | zf-C2H2   | 7 | 11 | 6  |
| 908 | ENSG00000083828 | ZNF586   | zf-C2H2   | 7 | 11 | 6  |
| 909 | ENSG00000188785 | ZNF548   | zf-C2H2   | 7 | 11 | 5  |
| 910 | ENSG00000105698 | USF2     | bHLH      | 7 | 11 | 5  |
| 911 | ENSG00000161642 | ZNF385A  | zf-C2H2   | 7 | 11 | 5  |
| 912 | ENSG00000116990 | MYCL     | bHLH      | 7 | 11 | 5  |
| 913 | ENSG00000196150 | ZNF250   | zf-C2H2   | 7 | 11 | 5  |
| 914 | ENSG00000153048 | CARHSP1  | CSD       | 7 | 11 | 4  |
| 915 | ENSG00000123405 | NFE2     | TF_bZIP   | 7 | 11 | 4  |
| 916 | ENSG00000148143 | ZNF462   | zf-C2H2   | 7 | 12 | 9  |
| 917 | ENSG00000242852 | ZNF709   | zf-C2H2   | 7 | 12 | 9  |
| 918 | ENSG00000075426 | FOSL2    | TF_bZIP   | 7 | 12 | 8  |
| 919 | ENSG00000110693 | SOX6     | HMG       | 7 | 12 | 8  |
| 920 | ENSG00000170954 | ZNF415   | zf-C2H2   | 7 | 12 | 8  |
| 921 | ENSG00000214022 | REPIN1   | zf-C2H2   | 7 | 12 | 8  |
| 922 | ENSG00000089775 | ZBTB25   | ZBTB      | 7 | 12 | 7  |
| 923 | ENSG00000101493 | ZNF516   | zf-C2H2   | 7 | 12 | 7  |
| 924 | ENSG00000105708 | ZNF14    | zf-C2H2   | 7 | 12 | 7  |
| 925 | ENSG00000157259 | GATAD1   | Others    | 7 | 12 | 7  |
| 926 | ENSG00000164631 | ZNF12    | zf-C2H2   | 7 | 12 | 7  |
| 927 | ENSG00000166704 | ZNF606   | zf-C2H2   | 7 | 12 | 7  |
| 928 | ENSG00000181827 | RFX7     | RFX       | 7 | 12 | 7  |
| 929 | ENSG00000251192 | ZNF674   | zf-C2H2   | 7 | 12 | 7  |
| 930 | ENSG00000116604 | MEF2D    | SRF       | 7 | 12 | 7  |
| 931 | ENSG00000182141 | ZNF708   | zf-C2H2   | 7 | 12 | 7  |
| 932 | ENSG00000185219 | ZNF445   | zf-C2H2   | 7 | 12 | 7  |
| 933 | ENSG00000197576 | HOXA4    | Homeobox  | 7 | 12 | 7  |
| 934 | ENSG00000178951 | ZBTB7A   | ZBTB      | 7 | 12 | 7  |
| 935 | ENSG00000197016 | ZNF470   | zf-C2H2   | 7 | 12 | 7  |
| 936 | ENSG00000198353 | HOXC4    | Homeobox  | 7 | 12 | 7  |
| 937 | ENSG00000117000 | RLF      | zf-C2H2   | 7 | 12 | 6  |

|      |                 |         |               |   |    |    |
|------|-----------------|---------|---------------|---|----|----|
| 938  | ENSG0000069667  | RORA    | THR-like      | 7 | 12 | 6  |
| 939  | ENSG00000124831 | LRRFIP1 | LRRFIP        | 7 | 12 | 6  |
| 940  | ENSG00000144026 | ZNF514  | zf-C2H2       | 7 | 12 | 6  |
| 941  | ENSG00000164916 | FO XK1  | Fork_head     | 7 | 12 | 6  |
| 942  | ENSG00000168795 | ZBTB5   | ZBTB          | 7 | 12 | 6  |
| 943  | ENSG00000171827 | ZNF570  | zf-C2H2       | 7 | 12 | 6  |
| 944  | ENSG00000172493 | AFF1    | AF-4          | 7 | 12 | 6  |
| 945  | ENSG00000175387 | SMAD2   | MH1           | 7 | 12 | 6  |
| 946  | ENSG00000189298 | ZKSCAN3 | zf-C2H2       | 7 | 12 | 6  |
| 947  | ENSG00000278318 | ZNF229  | zf-C2H2       | 7 | 12 | 6  |
| 948  | ENSG00000143614 | GATAD2B | zf-GATA       | 7 | 12 | 6  |
| 949  | ENSG00000198040 | ZNF84   | zf-C2H2       | 7 | 12 | 6  |
| 950  | ENSG00000267508 | ZNF285  | zf-C2H2       | 7 | 12 | 6  |
| 951  | ENSG00000260428 | SCX     | bHLH          | 7 | 12 | 6  |
| 952  | ENSG00000187792 | ZNF70   | zf-C2H2       | 7 | 12 | 6  |
| 953  | ENSG00000005889 | ZFX     | zf-C2H2       | 7 | 12 | 5  |
| 954  | ENSG00000062370 | ZNF112  | zf-C2H2       | 7 | 12 | 5  |
| 955  | ENSG00000084676 | NCOA1   | bHLH          | 7 | 12 | 5  |
| 956  | ENSG00000142599 | RERE    | zf-GATA       | 7 | 12 | 5  |
| 957  | ENSG00000170949 | ZNF160  | zf-C2H2       | 7 | 12 | 5  |
| 958  | ENSG00000172379 | ARNT2   | bHLH          | 7 | 12 | 5  |
| 959  | ENSG00000196498 | NCOR2   | MYB           | 7 | 12 | 5  |
| 960  | ENSG00000198046 | ZNF667  | zf-C2H2       | 7 | 12 | 5  |
| 961  | ENSG00000091656 | ZFHX4   | Homeobox      | 7 | 12 | 5  |
| 962  | ENSG00000102984 | ZNF821  | zf-C2H2       | 7 | 12 | 5  |
| 963  | ENSG00000114126 | TFDP2   | E2F           | 7 | 12 | 5  |
| 964  | ENSG00000162702 | ZNF281  | zf-C2H2       | 7 | 12 | 5  |
| 965  | ENSG00000184939 | ZFP90   | zf-C2H2       | 7 | 12 | 5  |
| 966  | ENSG00000198093 | ZNF649  | zf-C2H2       | 7 | 12 | 5  |
| 967  | ENSG00000198315 | ZKSCAN8 | zf-C2H2       | 7 | 12 | 5  |
| 968  | ENSG00000074657 | ZNF532  | zf-C2H2       | 7 | 12 | 4  |
| 969  | ENSG00000174282 | ZBTB4   | ZBTB          | 7 | 12 | 4  |
| 970  | ENSG00000131668 | BARX1   | Homeobox      | 7 | 12 | 4  |
| 971  | ENSG00000053254 | FO XN3  | Fork_head     | 7 | 12 | 3  |
| 972  | ENSG00000184481 | FO XO4  | Fork_head     | 7 | 12 | 3  |
| 973  | ENSG00000152217 | SETBP1  | Others        | 7 | 12 | 0  |
| 974  | ENSG00000171448 | ZBTB26  | ZBTB          | 7 | 13 | 5  |
| 975  | ENSG00000204644 | ZFP57   | zf-C2H2       | 8 | 7  | 10 |
| 976  | ENSG00000160321 | ZNF208  | zf-C2H2       | 8 | 7  | 9  |
| 977  | ENSG00000143458 | GABPB2  | Others        | 8 | 8  | 9  |
| 978  | ENSG00000012223 | LTF     | Others        | 8 | 8  | 9  |
| 979  | ENSG00000123358 | NR4A1   | NGFIB-like    | 8 | 8  | 7  |
| 980  | ENSG00000181722 | ZBTB20  | ZBTB          | 8 | 9  | 10 |
| 981  | ENSG00000173258 | ZNF483  | zf-C2H2       | 8 | 9  | 8  |
| 982  | ENSG00000188033 | ZNF490  | zf-C2H2       | 8 | 9  | 8  |
| 983  | ENSG00000274349 | ZNF658  | zf-C2H2       | 8 | 9  | 8  |
| 984  | ENSG00000100219 | XBP1    | TF_bZIP       | 8 | 9  | 8  |
| 985  | ENSG00000243660 | ZNF487  | Others        | 8 | 9  | 7  |
| 986  | ENSG00000177842 | ZNF620  | zf-C2H2       | 8 | 9  | 6  |
| 987  | ENSG00000196670 | ZFP62   | zf-C2H2       | 8 | 10 | 8  |
| 988  | ENSG00000083817 | ZNF416  | zf-C2H2       | 8 | 10 | 8  |
| 989  | ENSG00000131061 | ZNF341  | zf-C2H2       | 8 | 10 | 8  |
| 990  | ENSG00000106004 | H OXA5  | Homeobox      | 8 | 10 | 8  |
| 991  | ENSG00000198517 | MAFK    | TF_bZIP       | 8 | 10 | 8  |
| 992  | ENSG00000162924 | REL     | RHD           | 8 | 10 | 7  |
| 993  | ENSG00000124920 | MYRF    | NDT80/PhoG    | 8 | 10 | 7  |
| 994  | ENSG00000198939 | ZFP2    | zf-C2H2       | 8 | 10 | 7  |
| 995  | ENSG00000251247 | ZNF345  | zf-C2H2       | 8 | 10 | 7  |
| 996  | ENSG00000197024 | ZNF398  | zf-C2H2       | 8 | 10 | 7  |
| 997  | ENSG00000102554 | KLF5    | zf-C2H2       | 8 | 10 | 6  |
| 998  | ENSG00000166526 | ZNF3    | zf-C2H2       | 8 | 10 | 6  |
| 999  | ENSG00000172216 | CEBPB   | TF_bZIP       | 8 | 10 | 6  |
| 1000 | ENSG00000180035 | ZNF48   | zf-C2H2       | 8 | 10 | 6  |
| 1001 | ENSG00000189067 | LITAF   | zf-LITAF-like | 8 | 10 | 5  |
| 1002 | ENSG00000083814 | ZNF671  | zf-C2H2       | 8 | 10 | 5  |
| 1003 | ENSG00000165804 | ZNF219  | zf-C2H2       | 8 | 10 | 5  |
| 1004 | ENSG00000179456 | ZBTB18  | ZBTB          | 8 | 10 | 5  |
| 1005 | ENSG00000198839 | ZNF277  | zf-C2H2       | 8 | 10 | 5  |
| 1006 | ENSG00000159882 | ZNF230  | zf-C2H2       | 8 | 10 | 5  |
| 1007 | ENSG00000182979 | MTA1    | zf-GATA       | 8 | 10 | 5  |
| 1008 | ENSG00000184635 | ZNF93   | zf-C2H2       | 8 | 10 | 4  |
| 1009 | ENSG00000160094 | ZNF362  | zf-C2H2       | 8 | 10 | 4  |
| 1010 | ENSG00000155592 | ZKSCAN2 | zf-C2H2       | 8 | 11 | 9  |
| 1011 | ENSG00000030419 | IKZF2   | zf-C2H2       | 8 | 11 | 9  |
| 1012 | ENSG00000196597 | ZNF782  | zf-C2H2       | 8 | 11 | 8  |
| 1013 | ENSG00000159917 | ZNF235  | zf-C2H2       | 8 | 11 | 8  |
| 1014 | ENSG00000171223 | JUNB    | TF_bZIP       | 8 | 11 | 8  |
| 1015 | ENSG00000172006 | ZNF554  | zf-C2H2       | 8 | 11 | 8  |
| 1016 | ENSG00000196812 | ZSCAN16 | zf-C2H2       | 8 | 11 | 8  |
| 1017 | ENSG00000197302 | n_a     | Others        | 8 | 11 | 8  |
| 1018 | ENSG00000204920 | ZNF155  | zf-C2H2       | 8 | 11 | 8  |
| 1019 | ENSG00000185513 | L3MBTL1 | zf-C2HC       | 8 | 11 | 8  |
| 1020 | ENSG00000213928 | IRF9    | IRF           | 8 | 11 | 8  |
| 1021 | ENSG00000141040 | ZNF287  | zf-C2H2       | 8 | 11 | 8  |
| 1022 | ENSG00000189180 | ZNF33A  | zf-C2H2       | 8 | 11 | 7  |
| 1023 | ENSG00000177606 | JUN     | TF_bZIP       | 8 | 11 | 7  |
| 1024 | ENSG00000205189 | ZBTB10  | ZBTB          | 8 | 11 | 7  |
| 1025 | ENSG00000130844 | ZNF331  | zf-C2H2       | 8 | 11 | 7  |
| 1026 | ENSG00000165495 | PKNOX2  | Homeobox      | 8 | 11 | 7  |
| 1027 | ENSG00000166529 | ZSCAN21 | zf-C2H2       | 8 | 11 | 7  |
| 1028 | ENSG00000181007 | ZFP82   | zf-C2H2       | 8 | 11 | 7  |
| 1029 | ENSG00000196378 | ZNF34   | zf-C2H2       | 8 | 11 | 7  |
| 1030 | ENSG00000125618 | PAX8    | PAX           | 8 | 11 | 6  |
| 1031 | ENSG00000124216 | SNAI1   | zf-C2H2       | 8 | 11 | 6  |

|      |                 |            |            |   |    |   |
|------|-----------------|------------|------------|---|----|---|
| 1032 | ENSG00000147862 | NFIB       | CTF/NFI    | 8 | 11 | 6 |
| 1033 | ENSG00000163909 | HEYL       | bHLH       | 8 | 11 | 6 |
| 1034 | ENSG00000170265 | ZNF282     | zf-C2H2    | 8 | 11 | 6 |
| 1035 | ENSG00000197363 | ZNF517     | zf-C2H2    | 8 | 11 | 6 |
| 1036 | ENSG00000234284 | ZNF879     | zf-C2H2    | 8 | 11 | 6 |
| 1037 | ENSG00000261221 | ZNF865     | zf-C2H2    | 8 | 11 | 6 |
| 1038 | ENSG00000085644 | ZNF213     | zf-C2H2    | 8 | 11 | 6 |
| 1039 | ENSG00000196724 | ZNF418     | zf-C2H2    | 8 | 11 | 6 |
| 1040 | ENSG00000141568 | FO XK2     | Fork_head  | 8 | 11 | 6 |
| 1041 | ENSG00000197162 | ZNF785     | zf-C2H2    | 8 | 11 | 6 |
| 1042 | ENSG00000117318 | ID3        | bHLH       | 8 | 11 | 5 |
| 1043 | ENSG00000166188 | ZNF319     | zf-C2H2    | 8 | 11 | 5 |
| 1044 | ENSG00000114861 | FOXP1      | Fork_head  | 8 | 11 | 5 |
| 1045 | ENSG00000160685 | ZBTB7B     | ZBTB       | 8 | 11 | 5 |
| 1046 | ENSG00000177873 | ZNF619     | zf-C2H2    | 8 | 11 | 5 |
| 1047 | ENSG00000101115 | SALL4      | zf-C2H2    | 8 | 11 | 5 |
| 1048 | ENSG00000105229 | PIAS4      | zf-MIZ     | 8 | 11 | 5 |
| 1049 | ENSG00000118707 | TGIF2      | Homeobox   | 8 | 11 | 4 |
| 1050 | ENSG00000121413 | ZSCAN18    | zf-C2H2    | 8 | 11 | 4 |
| 1051 | ENSG00000126561 | STAT5A     | STAT       | 8 | 11 | 4 |
| 1052 | ENSG00000105419 | MEIS3      | Homeobox   | 8 | 11 | 4 |
| 1053 | ENSG00000007866 | TEAD3      | TEA        | 8 | 11 | 3 |
| 1054 | ENSG00000189164 | ZNF527     | zf-C2H2    | 8 | 11 | 3 |
| 1055 | ENSG00000253293 | HOXA10     | Homeobox   | 8 | 11 | 3 |
| 1056 | ENSG00000160062 | ZBTB8A     | ZBTB       | 8 | 12 | 9 |
| 1057 | ENSG00000186026 | ZNF284     | zf-C2H2    | 8 | 12 | 9 |
| 1058 | ENSG00000186448 | ZNF197     | zf-C2H2    | 8 | 12 | 9 |
| 1059 | ENSG00000099326 | MZF1       | zf-C2H2    | 8 | 12 | 9 |
| 1060 | ENSG00000215271 | HOMEZ      | Homeobox   | 8 | 12 | 8 |
| 1061 | ENSG00000181666 | ZNF875     | zf-C2H2    | 8 | 12 | 8 |
| 1062 | ENSG00000184517 | ZFP1       | zf-C2H2    | 8 | 12 | 8 |
| 1063 | ENSG00000257923 | CUX1       | CUT        | 8 | 12 | 8 |
| 1064 | ENSG00000068323 | TFE3       | bHLH       | 8 | 12 | 8 |
| 1065 | ENSG00000102878 | HSF4       | HSF        | 8 | 12 | 8 |
| 1066 | ENSG00000118689 | FOXO3      | Fork_head  | 8 | 12 | 7 |
| 1067 | ENSG00000174586 | ZNF497     | zf-C2H2    | 8 | 12 | 7 |
| 1068 | ENSG00000072310 | SREBF1     | bHLH       | 8 | 12 | 7 |
| 1069 | ENSG00000136367 | ZFHX2      | Homeobox   | 8 | 12 | 7 |
| 1070 | ENSG00000157514 | TSC22D3    | TSC22      | 8 | 12 | 7 |
| 1071 | ENSG00000101216 | GMEB2      | SAND       | 8 | 12 | 7 |
| 1072 | ENSG00000105722 | ERF        | ETS        | 8 | 12 | 7 |
| 1073 | ENSG00000105880 | DLX5       | Homeobox   | 8 | 12 | 7 |
| 1074 | ENSG00000119508 | NR4A3      | NGFIB-like | 8 | 12 | 7 |
| 1075 | ENSG00000143178 | TBX19      | T-box      | 8 | 12 | 7 |
| 1076 | ENSG00000176371 | ZSCAN2     | zf-C2H2    | 8 | 12 | 7 |
| 1077 | ENSG00000188283 | ZNF383     | zf-C2H2    | 8 | 12 | 7 |
| 1078 | ENSG00000152926 | ZNF117     | zf-C2H2    | 8 | 12 | 6 |
| 1079 | ENSG00000174428 | GT F2IRD2B | GT F2I     | 8 | 12 | 6 |
| 1080 | ENSG00000178665 | ZNF713     | zf-C2H2    | 8 | 12 | 6 |
| 1081 | ENSG00000198182 | ZNF607     | zf-C2H2    | 8 | 12 | 6 |
| 1082 | ENSG00000080298 | RFX3       | RFX        | 8 | 12 | 6 |
| 1083 | ENSG00000105997 | HOXA3      | Homeobox   | 8 | 12 | 6 |
| 1084 | ENSG00000116017 | ARID3A     | ARID       | 8 | 12 | 6 |
| 1085 | ENSG00000143190 | POU2F1     | Pou        | 8 | 12 | 6 |
| 1086 | ENSG00000171817 | ZNF540     | zf-C2H2    | 8 | 12 | 6 |
| 1087 | ENSG00000176399 | DMRTA1     | DM         | 8 | 12 | 6 |
| 1088 | ENSG00000186918 | ZNF395     | Others     | 8 | 12 | 6 |
| 1089 | ENSG00000197566 | ZNF624     | zf-C2H2    | 8 | 12 | 6 |
| 1090 | ENSG00000198453 | ZNF568     | zf-C2H2    | 8 | 12 | 6 |
| 1091 | ENSG00000125846 | ZNF133     | zf-C2H2    | 8 | 12 | 6 |
| 1092 | ENSG00000138378 | STAT4      | STAT       | 8 | 12 | 6 |
| 1093 | ENSG00000143842 | SOX13      | HMG        | 8 | 12 | 6 |
| 1094 | ENSG00000151090 | THRB       | THR-like   | 8 | 12 | 6 |
| 1095 | ENSG00000159905 | n_a        | zf-C2H2    | 8 | 12 | 6 |
| 1096 | ENSG00000163064 | EN1        | Homeobox   | 8 | 12 | 6 |
| 1097 | ENSG00000165030 | NFIL3      | TF_bZIP    | 8 | 12 | 6 |
| 1098 | ENSG00000170631 | ZNF16      | zf-C2H2    | 8 | 12 | 6 |
| 1099 | ENSG00000185669 | n_a        | zf-C2H2    | 8 | 12 | 6 |
| 1100 | ENSG00000187634 | SAMD11     | SAND       | 8 | 12 | 6 |
| 1101 | ENSG00000196152 | ZNF79      | zf-C2H2    | 8 | 12 | 6 |
| 1102 | ENSG00000196456 | ZNF775     | zf-C2H2    | 8 | 12 | 6 |
| 1103 | ENSG00000137273 | FOX F2     | Fork_head  | 8 | 12 | 6 |
| 1104 | ENSG00000159216 | RUNX1      | Runt       | 8 | 12 | 5 |
| 1105 | ENSG00000167377 | ZNF23      | zf-C2H2    | 8 | 12 | 5 |
| 1106 | ENSG00000168610 | STAT3      | STAT       | 8 | 12 | 5 |
| 1107 | ENSG00000054598 | FOXC1      | Fork_head  | 8 | 12 | 5 |
| 1108 | ENSG00000165512 | ZNF22      | zf-C2H2    | 8 | 12 | 5 |
| 1109 | ENSG00000165655 | ZNF503     | Others     | 8 | 12 | 5 |
| 1110 | ENSG00000182463 | TSHZ2      | zf-C2H2    | 8 | 12 | 5 |
| 1111 | ENSG00000197863 | ZNF790     | zf-C2H2    | 8 | 12 | 5 |
| 1112 | ENSG00000204231 | RXR B      | RXR-like   | 8 | 12 | 5 |
| 1113 | ENSG00000005073 | HOXA11     | Homeobox   | 8 | 12 | 5 |
| 1114 | ENSG00000061455 | PRDM6      | zf-C2H2    | 8 | 12 | 5 |
| 1115 | ENSG00000117595 | IRF6       | IRF        | 8 | 12 | 5 |
| 1116 | ENSG00000131759 | RARA       | THR-like   | 8 | 12 | 5 |
| 1117 | ENSG00000150907 | FOXO1      | Fork_head  | 8 | 12 | 5 |
| 1118 | ENSG00000196214 | ZNF766     | zf-C2H2    | 8 | 12 | 5 |
| 1119 | ENSG00000197808 | ZNF461     | zf-C2H2    | 8 | 12 | 5 |
| 1120 | ENSG00000198911 | SREBF2     | bHLH       | 8 | 12 | 5 |
| 1121 | ENSG00000236104 | ZBTB22     | ZBTB       | 8 | 12 | 5 |
| 1122 | ENSG00000198846 | TOX        | HMG        | 8 | 12 | 5 |
| 1123 | ENSG00000150347 | ARID5B     | ARID       | 8 | 12 | 4 |
| 1124 | ENSG00000196867 | ZFP28      | zf-C2H2    | 8 | 12 | 4 |
| 1125 | ENSG00000142065 | ZFP14      | zf-C2H2    | 8 | 12 | 4 |

|      |                 |          |               |   |    |    |
|------|-----------------|----------|---------------|---|----|----|
| 1126 | ENSG00000143379 | SETDB1   | MBD           | 8 | 12 | 4  |
| 1127 | ENSG00000143437 | ARNT     | bHLH          | 8 | 12 | 4  |
| 1128 | ENSG00000146592 | CREB5    | TF_bZIP       | 8 | 12 | 4  |
| 1129 | ENSG00000175727 | MLXIP    | bHLH          | 8 | 12 | 4  |
| 1130 | ENSG00000196275 | GTF2IRD2 | GTF2I         | 8 | 12 | 4  |
| 1131 | ENSG00000057935 | MTA3     | zf-GATA       | 8 | 12 | 4  |
| 1132 | ENSG00000089486 | CDIP1    | zf-LITAF-like | 8 | 12 | 4  |
| 1133 | ENSG00000100968 | NFATC4   | RHD           | 8 | 12 | 4  |
| 1134 | ENSG00000112658 | SRF      | SRF           | 8 | 12 | 4  |
| 1135 | ENSG00000115738 | ID2      | bHLH          | 8 | 12 | 4  |
| 1136 | ENSG00000150051 | MKX      | Homeobox      | 8 | 12 | 4  |
| 1137 | ENSG00000170581 | STAT2    | STAT          | 8 | 12 | 4  |
| 1138 | ENSG00000184271 | n_a      | Pou           | 8 | 12 | 4  |
| 1139 | ENSG00000196605 | ZNF846   | zf-C2H2       | 8 | 12 | 4  |
| 1140 | ENSG00000251493 | FOXD1    | Fork_head     | 8 | 12 | 4  |
| 1141 | ENSG00000167771 | RCOR2    | MYB           | 8 | 12 | 4  |
| 1142 | ENSG00000130684 | ZNF337   | zf-C2H2       | 8 | 12 | 3  |
| 1143 | ENSG00000131196 | NFATC1   | RHD           | 8 | 12 | 3  |
| 1144 | ENSG00000144218 | AFF3     | AF-4          | 8 | 12 | 3  |
| 1145 | ENSG00000148737 | TCF7L2   | HMG           | 8 | 12 | 3  |
| 1146 | ENSG00000164093 | PITX2    | Homeobox      | 8 | 12 | 3  |
| 1147 | ENSG00000010030 | ETV7     | ETS           | 8 | 12 | 3  |
| 1148 | ENSG00000102349 | KLF8     | zf-C2H2       | 8 | 12 | 3  |
| 1149 | ENSG00000140044 | JDP2     | TF_bZIP       | 8 | 12 | 3  |
| 1150 | ENSG00000143995 | MEIS1    | Homeobox      | 8 | 12 | 3  |
| 1151 | ENSG00000196843 | ARID5A   | ARID          | 8 | 12 | 3  |
| 1152 | ENSG00000205903 | ZNF316   | zf-C2H2       | 8 | 12 | 3  |
| 1153 | ENSG00000221869 | CEBPD    | TF_bZIP       | 8 | 12 | 3  |
| 1154 | ENSG00000112182 | BACH2    | TF_bZIP       | 8 | 12 | 2  |
| 1155 | ENSG00000114853 | ZBTB47   | ZBTB          | 8 | 12 | 2  |
| 1156 | ENSG00000119950 | MXI1     | bHLH          | 8 | 12 | 2  |
| 1157 | ENSG00000126351 | THRA     | THR-like      | 8 | 12 | 2  |
| 1158 | ENSG00000173757 | STAT5B   | STAT          | 8 | 12 | 2  |
| 1159 | ENSG00000196323 | ZBTB44   | ZBTB          | 8 | 12 | 2  |
| 1160 | ENSG00000126603 | GLIS2    | zf-C2H2       | 8 | 12 | 2  |
| 1161 | ENSG00000126778 | SIX1     | Homeobox      | 8 | 12 | 2  |
| 1162 | ENSG00000164684 | ZNF704   | Others        | 8 | 12 | 2  |
| 1163 | ENSG00000170370 | EMX2     | Homeobox      | 8 | 12 | 2  |
| 1164 | ENSG00000178573 | MAF      | TF_bZIP       | 8 | 12 | 2  |
| 1165 | ENSG00000214717 | ZBED1    | zf-BED        | 8 | 12 | 2  |
| 1166 | ENSG00000120837 | NFYB     | NF-YB         | 8 | 12 | 1  |
| 1167 | ENSG00000139083 | ETV6     | ETS           | 8 | 12 | 1  |
| 1168 | ENSG00000153814 | JAZF1    | zf-C2H2       | 8 | 12 | 1  |
| 1169 | ENSG00000172201 | ID4      | bHLH          | 8 | 12 | 1  |
| 1170 | ENSG00000123095 | BHLHE41  | bHLH          | 8 | 12 | 0  |
| 1171 | ENSG00000124766 | SOX4     | HMG           | 8 | 12 | 0  |
| 1172 | ENSG00000187607 | ZNF286A  | zf-C2H2       | 8 | 13 | 8  |
| 1173 | ENSG00000168214 | RBPJ     | CSL           | 9 | 7  | 8  |
| 1174 | ENSG00000175691 | ZNF77    | zf-C2H2       | 9 | 8  | 9  |
| 1175 | ENSG00000170166 | HOXD4    | Homeobox      | 9 | 9  | 10 |
| 1176 | ENSG00000121075 | TBX4     | T-box         | 9 | 9  | 8  |
| 1177 | ENSG00000169981 | ZNF35    | zf-C2H2       | 9 | 10 | 10 |
| 1178 | ENSG00000204946 | ZNF783   | zf-C2H2       | 9 | 10 | 10 |
| 1179 | ENSG00000137834 | SMAD6    | MH1           | 9 | 10 | 9  |
| 1180 | ENSG00000284691 | n_a      | zf-C2H2       | 9 | 10 | 8  |
| 1181 | ENSG00000122877 | EGR2     | zf-C2H2       | 9 | 10 | 8  |
| 1182 | ENSG00000143355 | LHX9     | Homeobox      | 9 | 10 | 7  |
| 1183 | ENSG00000161914 | ZNF653   | zf-C2H2       | 9 | 11 | 6  |
| 1184 | ENSG00000006704 | GTF2IRD1 | GTF2I         | 9 | 11 | 5  |
| 1185 | ENSG00000179627 | n_a      | ZBTB          | 9 | 12 | 8  |
| 1186 | ENSG00000103199 | ZNF500   | zf-C2H2       | 9 | 12 | 6  |
| 1187 | ENSG00000106031 | HOXA13   | Homeobox      | 9 | 12 | 5  |
| 1188 | ENSG00000176842 | IRX5     | Homeobox      | 9 | 12 | 5  |
| 1189 | ENSG00000186350 | RXRA     | RXR-like      | 9 | 12 | 5  |
| 1190 | ENSG00000152284 | TCF7L1   | HMG           | 9 | 12 | 3  |
| 1191 | ENSG00000186496 | ZNF396   | zf-C2H2       | 9 | 13 | 7  |
