# Supplementary material for: Decoding the differentiation of mesenchymal stem cells into mesangial cells at the transcriptomic level
Source: PubMed Central journal article supplement (PMC7339572; doi:10.1186/s12864-020-06868-5), 2020-07-07
Supplement: 12864_2020_6868_MOESM3_ESM.pdf [file 12864_2020_6868_MOESM3_ESM.pdf]

**Monotonic descending pattern genes with DE≤4**

|    | <u>Ensembl Gene ID</u> | <u>Gene Names</u> | <u>DE</u> | <u>p.value</u> | <u>q.value</u> | <u>SVDE</u> |
|----|------------------------|-------------------|-----------|----------------|----------------|-------------|
| 1  | ENSG00000100994        | PYGB              | 0         | 0              | 0              | 0           |
| 2  | ENSG00000144136        | SLC20A1           | 0         | 0              | 0              | 0           |
| 3  | ENSG00000168288        | MMADHC            | 0         | 0              | 0              | 0           |
| 4  | ENSG00000184661        | CDCA2             | 0         | 0              | 0              | 0           |
| 5  | ENSG00000198805        | PNP               | 0         | 0              | 0              | 0           |
| 6  | ENSG00000143549        | TPM3              | 0         | 0              | 0              | 0.01        |
| 7  | ENSG00000171552        | BCL2L1            | 0         | 0              | 0              | 0.06        |
| 8  | ENSG00000110955        | ATP5F1B           | 0         | 0              | 0              | 0.08        |
| 9  | ENSG00000100462        | PRMT5             | 0         | 0              | 0              | 0.14        |
| 10 | ENSG00000135046        | ANXA1             | 0         | 0              | 0              | 0.15        |
| 11 | ENSG00000115053        | NCL               | 0         | 0              | 0              | 0.16        |
| 12 | ENSG00000148773        | MKI67             | 0         | 0              | 0              | 0.19        |
| 13 | ENSG00000178773        | CPNE7             | 0         | 0              | 0              | 0.29        |
| 14 | ENSG00000188064        | WNT7B             | 0         | 0              | 0              | 0.31        |
| 15 | ENSG00000150753        | CCT5              | 0         | 0              | 0              | 0.4         |
| 16 | ENSG00000175592        | FOSL1             | 0         | 0              | 0              | 0.4         |
| 17 | ENSG00000181163        | NPM1              | 0         | 0              | 0              | 0.4         |
| 18 | ENSG00000140525        | FANCI             | 0         | 0              | 0              | 0.48        |
| 19 | ENSG00000102312        | PORCN             | 0         | 0              | 0              | 0.56        |
| 20 | ENSG00000123473        | STIL              | 0         | 0              | 0              | 0.61        |
| 21 | ENSG00000175166        | PSMD2             | 0         | 0              | 0              | 0.74        |
| 22 | ENSG00000165678        | GHITM             | 0         | 0              | 0              | 0.79        |
| 23 | ENSG00000139289        | PHLDA1            | 0         | 0              | 0              | 0.8         |
| 24 | ENSG00000150630        | VEGFC             | 0         | 0              | 0              | 2.46        |
| 25 | ENSG00000100034        | PPM1F             | 1         | 6.38E-07       | 8.70E-05       | 0           |
| 26 | ENSG00000137309        | HMGA1             | 1         | 6.38E-07       | 8.70E-05       | 0           |
| 27 | ENSG00000159131        | GART              | 1         | 6.38E-07       | 8.70E-05       | 0           |
| 28 | ENSG00000203760        | CENPW             | 1         | 6.38E-07       | 8.70E-05       | 0.03        |
| 29 | ENSG00000198901        | PRC1              | 1         | 6.38E-07       | 8.70E-05       | 0.07        |
| 30 | ENSG00000124191        | TOX2              | 1         | 6.38E-07       | 8.70E-05       | 0.08        |
| 31 | ENSG00000197467        | COL13A1           | 1         | 6.38E-07       | 8.70E-05       | 0.08        |
| 32 | ENSG00000071539        | TRIP13            | 1         | 6.38E-07       | 8.70E-05       | 0.09        |
| 33 | ENSG00000089685        | BIRC5             | 1         | 6.38E-07       | 8.70E-05       | 0.09        |
| 34 | ENSG00000118785        | SPP1              | 1         | 6.38E-07       | 8.70E-05       | 0.09        |
| 35 | ENSG00000111206        | FOXM1             | 1         | 6.38E-07       | 8.70E-05       | 0.11        |
| 36 | ENSG00000119714        | GPR68             | 1         | 6.38E-07       | 8.70E-05       | 0.11        |
| 37 | ENSG00000166803        | PCLAF             | 1         | 6.38E-07       | 8.70E-05       | 0.11        |
| 38 | ENSG00000135472        | FAIM2             | 1         | 6.38E-07       | 8.70E-05       | 0.12        |
| 39 | ENSG00000196878        | LAMB3             | 1         | 6.38E-07       | 8.70E-05       | 0.12        |
| 40 | ENSG00000100739        | BDKRB1            | 1         | 6.38E-07       | 8.70E-05       | 0.13        |
| 41 | ENSG00000110092        | CCND1             | 1         | 6.38E-07       | 8.70E-05       | 0.13        |
| 42 | ENSG00000113368        | LMNB1             | 1         | 6.38E-07       | 8.70E-05       | 0.15        |
| 43 | ENSG00000196497        | IPO4              | 1         | 6.38E-07       | 8.70E-05       | 0.16        |
| 44 | ENSG00000088325        | TPX2              | 1         | 6.38E-07       | 8.70E-05       | 0.17        |
| 45 | ENSG00000184232        | OAF               | 1         | 6.38E-07       | 8.70E-05       | 0.17        |
| 46 | ENSG00000258947        | TUBB3             | 1         | 6.38E-07       | 8.70E-05       | 0.18        |
| 47 | ENSG00000198826        | ARHGAP11A         | 1         | 6.38E-07       | 8.70E-05       | 0.21        |
| 48 | ENSG00000133195        | SLC39A11          | 1         | 6.38E-07       | 8.70E-05       | 0.22        |
| 49 | ENSG00000183856        | IQGAP3            | 1         | 6.38E-07       | 8.70E-05       | 0.22        |
| 50 | ENSG00000107984        | DKK1              | 1         | 6.38E-07       | 8.70E-05       | 0.25        |
| 51 | ENSG00000165733        | BMS1              | 1         | 6.38E-07       | 8.70E-05       | 0.25        |
| 52 | ENSG00000171241        | SHCBP1            | 1         | 6.38E-07       | 8.70E-05       | 0.26        |
| 53 | ENSG00000137812        | KNL1              | 1         | 6.38E-07       | 8.70E-05       | 0.27        |
| 54 | ENSG00000125912        | NCLN              | 1         | 6.38E-07       | 8.70E-05       | 0.29        |
| 55 | ENSG00000132780        | NASP              | 1         | 6.38E-07       | 8.70E-05       | 0.29        |
| 56 | ENSG00000119392        | GLE1              | 1         | 6.38E-07       | 8.70E-05       | 0.31        |
| 57 | ENSG00000109917        | ZPR1              | 1         | 6.38E-07       | 8.70E-05       | 0.32        |
| 58 | ENSG00000186185        | KIF18B            | 1         | 6.38E-07       | 8.70E-05       | 0.32        |
| 59 | ENSG00000214114        | MYCBP             | 1         | 6.38E-07       | 8.70E-05       | 0.33        |
| 60 | ENSG00000138162        | TACC2             | 1         | 6.38E-07       | 8.70E-05       | 0.34        |
| 61 | ENSG00000143228        | NUF2              | 1         | 6.38E-07       | 8.70E-05       | 0.35        |
| 62 | ENSG00000187522        | HSPA14            | 1         | 6.38E-07       | 8.70E-05       | 0.35        |
| 63 | ENSG00000100526        | CDKN3             | 1         | 6.38E-07       | 8.70E-05       | 0.38        |
| 64 | ENSG00000068438        | FTS1              | 1         | 6.38E-07       | 8.70E-05       | 0.4         |
| 65 | ENSG00000131467        | PSME3             | 1         | 6.38E-07       | 8.70E-05       | 0.4         |
| 66 | ENSG00000109511        | ANXA10            | 1         | 6.38E-07       | 8.70E-05       | 0.41        |
| 67 | ENSG00000138279        | ANXA7             | 1         | 6.38E-07       | 8.70E-05       | 0.41        |
| 68 | ENSG00000090889        | KIF4A             | 1         | 6.38E-07       | 8.70E-05       | 0.42        |
| 69 | ENSG00000104824        | HNRNPL            | 1         | 6.38E-07       | 8.70E-05       | 0.42        |
| 70 | ENSG00000142945        | KIF2C             | 1         | 6.38E-07       | 8.70E-05       | 0.46        |
| 71 | ENSG00000144381        | HSPD1             | 1         | 6.38E-07       | 8.70E-05       | 0.46        |
| 72 | ENSG00000122966        | CIT               | 1         | 6.38E-07       | 8.70E-05       | 0.47        |
| 73 | ENSG00000149554        | CHEK1             | 1         | 6.38E-07       | 8.70E-05       | 0.47        |
| 74 | ENSG00000101447        | FAM83D            | 1         | 6.38E-07       | 8.70E-05       | 0.48        |
| 75 | ENSG00000089159        | PXN               | 1         | 6.38E-07       | 8.70E-05       | 0.49        |
| 76 | ENSG00000085063        | CD59              | 1         | 6.38E-07       | 8.70E-05       | 0.5         |
| 77 | ENSG00000144063        | MALL              | 1         | 6.38E-07       | 8.70E-05       | 0.5         |
| 78 | ENSG00000008394        | MGST1             | 1         | 6.38E-07       | 8.70E-05       | 0.51        |
| 79 | ENSG00000271303        | SRXN1             | 1         | 6.38E-07       | 8.70E-05       | 0.51        |
| 80 | ENSG00000026508        | CD44              | 1         | 6.38E-07       | 8.70E-05       | 0.52        |
| 81 | ENSG00000114738        | MAPKAPK3          | 1         | 6.38E-07       | 8.70E-05       | 0.53        |
| 82 | ENSG00000055044        | NOP58             | 1         | 6.38E-07       | 8.70E-05       | 0.55        |
| 83 | ENSG00000092853        | CLSPN             | 1         | 6.38E-07       | 8.70E-05       | 0.55        |
| 84 | ENSG00000099783        | HNRNPM            | 1         | 6.38E-07       | 8.70E-05       | 0.55        |
| 85 | ENSG00000106089        | STX1A             | 1         | 6.38E-07       | 8.70E-05       | 0.6         |
| 86 | ENSG00000131747        | TOP2A             | 1         | 6.38E-07       | 8.70E-05       | 0.63        |
| 87 | ENSG00000175426        | PCSK1             | 1         | 6.38E-07       | 8.70E-05       | 0.63        |
| 88 | ENSG00000181751        | C5orf30           | 1         | 6.38E-07       | 8.70E-05       | 0.63        |
| 89 | ENSG00000132436        | FIGL1             | 1         | 6.38E-07       | 8.70E-05       | 0.64        |
| 90 | ENSG00000065328        | MCM10             | 1         | 6.38E-07       | 8.70E-05       | 0.65        |
| 91 | ENSG00000072571        | HMMR              | 1         | 6.38E-07       | 8.70E-05       | 0.65        |

|     |                 |                  |   |          |             |      |
|-----|-----------------|------------------|---|----------|-------------|------|
| 92  | ENSG00000146410 | <i>MTFR2</i>     | 1 | 6.38E-07 | 8.70E-05    | 0.65 |
| 93  | ENSG00000181019 | <i>NQO1</i>      | 1 | 6.38E-07 | 8.70E-05    | 0.66 |
| 94  | ENSG00000198768 | <i>APCDD1L</i>   | 1 | 6.38E-07 | 8.70E-05    | 0.66 |
| 95  | ENSG00000163468 | <i>CCT3</i>      | 1 | 6.38E-07 | 8.70E-05    | 0.73 |
| 96  | ENSG00000166881 | <i>NEMP1</i>     | 1 | 6.38E-07 | 8.70E-05    | 0.74 |
| 97  | ENSG00000093009 | <i>CDC45</i>     | 1 | 6.38E-07 | 8.70E-05    | 0.8  |
| 98  | ENSG00000143127 | <i>ITGA10</i>    | 1 | 6.38E-07 | 8.70E-05    | 0.82 |
| 99  | ENSG00000109805 | <i>NCAPG</i>     | 1 | 6.38E-07 | 8.70E-05    | 0.98 |
| 100 | ENSG00000153044 | <i>CENPH</i>     | 1 | 6.38E-07 | 8.70E-05    | 0.98 |
| 101 | ENSG00000024526 | <i>DEPDC1</i>    | 1 | 6.38E-07 | 8.70E-05    | 1.01 |
| 102 | ENSG00000164038 | <i>SLC9B2</i>    | 1 | 6.38E-07 | 8.70E-05    | 1.03 |
| 103 | ENSG00000135476 | <i>ESPL1</i>     | 1 | 6.38E-07 | 8.70E-05    | 1.06 |
| 104 | ENSG00000103522 | <i>IL21R</i>     | 1 | 6.38E-07 | 8.70E-05    | 1.07 |
| 105 | ENSG00000277161 | <i>PIGW</i>      | 1 | 6.38E-07 | 8.70E-05    | 1.07 |
| 106 | ENSG00000013016 | <i>EHD3</i>      | 1 | 6.38E-07 | 8.70E-05    | 1.09 |
| 107 | ENSG00000102172 | <i>SMS</i>       | 1 | 6.38E-07 | 8.70E-05    | 1.09 |
| 108 | ENSG00000164032 | <i>H2AFZ</i>     | 1 | 6.38E-07 | 8.70E-05    | 1.18 |
| 109 | ENSG00000087586 | <i>AURKA</i>     | 1 | 6.38E-07 | 8.70E-05    | 1.41 |
| 110 | ENSG00000119777 | <i>TMEM214</i>   | 1 | 6.38E-07 | 8.70E-05    | 1.45 |
| 111 | ENSG00000122952 | <i>ZWINT</i>     | 1 | 6.38E-07 | 8.70E-05    | 1.61 |
| 112 | ENSG00000176890 | <i>TYMS</i>      | 1 | 6.38E-07 | 8.70E-05    | 1.97 |
| 113 | ENSG00000158402 | <i>CDC25C</i>    | 1 | 6.38E-07 | 8.70E-05    | 2.14 |
| 114 | ENSG00000108671 | <i>PSMD11</i>    | 1 | 6.38E-07 | 8.70E-05    | 3.15 |
| 115 | ENSG00000013297 | <i>CLDN11</i>    | 2 | 7.66E-06 | 0.000364742 | 0    |
| 116 | ENSG00000107959 | <i>PITRM1</i>    | 2 | 7.66E-06 | 0.000364742 | 0    |
| 117 | ENSG00000110090 | <i>CPT1A</i>     | 2 | 7.66E-06 | 0.000364742 | 0    |
| 118 | ENSG00000113643 | <i>RARS</i>      | 2 | 7.66E-06 | 0.000364742 | 0    |
| 119 | ENSG00000163584 | <i>RPL22L1</i>   | 2 | 7.66E-06 | 0.000364742 | 0    |
| 120 | ENSG00000121579 | <i>NAA50</i>     | 2 | 7.66E-06 | 0.000364742 | 0.01 |
| 121 | ENSG00000143387 | <i>CTSK</i>      | 2 | 7.66E-06 | 0.000364742 | 0.01 |
| 122 | ENSG00000172115 | <i>CYCS</i>      | 2 | 7.66E-06 | 0.000364742 | 0.02 |
| 123 | ENSG00000113013 | <i>HSPA9</i>     | 2 | 7.66E-06 | 0.000364742 | 0.03 |
| 124 | ENSG00000125968 | <i>ID1</i>       | 2 | 7.66E-06 | 0.000364742 | 0.03 |
| 125 | ENSG00000008083 | <i>JARID2</i>    | 2 | 7.66E-06 | 0.000364742 | 0.04 |
| 126 | ENSG00000033011 | <i>ALG1</i>      | 2 | 7.66E-06 | 0.000364742 | 0.05 |
| 127 | ENSG00000171488 | <i>LRRRC8C</i>   | 2 | 7.66E-06 | 0.000364742 | 0.06 |
| 128 | ENSG00000256235 | <i>SMIM3</i>     | 2 | 7.66E-06 | 0.000364742 | 0.06 |
| 129 | ENSG00000011426 | <i>ANLN</i>      | 2 | 7.66E-06 | 0.000364742 | 0.07 |
| 130 | ENSG00000057608 | <i>GD12</i>      | 2 | 7.66E-06 | 0.000364742 | 0.07 |
| 131 | ENSG00000138134 | <i>STAMBPL1</i>  | 2 | 7.66E-06 | 0.000364742 | 0.07 |
| 132 | ENSG00000152234 | <i>ATP5F1A</i>   | 2 | 7.66E-06 | 0.000364742 | 0.07 |
| 133 | ENSG00000101367 | <i>MAPRE1</i>    | 2 | 7.66E-06 | 0.000364742 | 0.09 |
| 134 | ENSG00000119139 | <i>TJP2</i>      | 2 | 7.66E-06 | 0.000364742 | 0.09 |
| 135 | ENSG00000148680 | <i>HTR7</i>      | 2 | 7.66E-06 | 0.000364742 | 0.09 |
| 136 | ENSG00000172009 | <i>THOP1</i>     | 2 | 7.66E-06 | 0.000364742 | 0.09 |
| 137 | ENSG00000111667 | <i>USP5</i>      | 2 | 7.66E-06 | 0.000364742 | 0.1  |
| 138 | ENSG00000107937 | <i>GTPBP4</i>    | 2 | 7.66E-06 | 0.000364742 | 0.11 |
| 139 | ENSG00000110330 | <i>BIRC2</i>     | 2 | 7.66E-06 | 0.000364742 | 0.12 |
| 140 | ENSG00000115884 | <i>SDC1</i>      | 2 | 7.66E-06 | 0.000364742 | 0.12 |
| 141 | ENSG00000117724 | <i>CENPF</i>     | 2 | 7.66E-06 | 0.000364742 | 0.12 |
| 142 | ENSG00000075218 | <i>GTSE1</i>     | 2 | 7.66E-06 | 0.000364742 | 0.13 |
| 143 | ENSG00000152253 | <i>SPC25</i>     | 2 | 7.66E-06 | 0.000364742 | 0.13 |
| 144 | ENSG00000058729 | <i>RIOK2</i>     | 2 | 7.66E-06 | 0.000364742 | 0.14 |
| 145 | ENSG00000120948 | <i>TARDBP</i>    | 2 | 7.66E-06 | 0.000364742 | 0.14 |
| 146 | ENSG00000170522 | <i>ELOVL6</i>    | 2 | 7.66E-06 | 0.000364742 | 0.14 |
| 147 | ENSG00000165244 | <i>ZNF367</i>    | 2 | 7.66E-06 | 0.000364742 | 0.15 |
| 148 | ENSG00000244405 | <i>ETV5</i>      | 2 | 7.66E-06 | 0.000364742 | 0.15 |
| 149 | ENSG00000142634 | <i>EFHD2</i>     | 2 | 7.66E-06 | 0.000364742 | 0.16 |
| 150 | ENSG00000173418 | <i>NAA20</i>     | 2 | 7.66E-06 | 0.000364742 | 0.16 |
| 151 | ENSG00000186193 | <i>SAPCD2</i>    | 2 | 7.66E-06 | 0.000364742 | 0.16 |
| 152 | ENSG00000104738 | <i>MCM4</i>      | 2 | 7.66E-06 | 0.000364742 | 0.17 |
| 153 | ENSG00000138376 | <i>BARD1</i>     | 2 | 7.66E-06 | 0.000364742 | 0.17 |
| 154 | ENSG00000147536 | <i>GINS4</i>     | 2 | 7.66E-06 | 0.000364742 | 0.17 |
| 155 | ENSG00000115233 | <i>PSMD14</i>    | 2 | 7.66E-06 | 0.000364742 | 0.18 |
| 156 | ENSG00000137310 | <i>TCF19</i>     | 2 | 7.66E-06 | 0.000364742 | 0.19 |
| 157 | ENSG00000138182 | <i>KIF20B</i>    | 2 | 7.66E-06 | 0.000364742 | 0.19 |
| 158 | ENSG00000139618 | <i>BRCAC2</i>    | 2 | 7.66E-06 | 0.000364742 | 0.19 |
| 159 | ENSG00000168078 | <i>PBK</i>       | 2 | 7.66E-06 | 0.000364742 | 0.2  |
| 160 | ENSG00000071054 | <i>MAP4K4</i>    | 2 | 7.66E-06 | 0.000364742 | 0.21 |
| 161 | ENSG00000109919 | <i>MTCH2</i>     | 2 | 7.66E-06 | 0.000364742 | 0.21 |
| 162 | ENSG00000102359 | <i>SRPX2</i>     | 2 | 7.66E-06 | 0.000364742 | 0.22 |
| 163 | ENSG00000119969 | <i>HELLS</i>     | 2 | 7.66E-06 | 0.000364742 | 0.22 |
| 164 | ENSG00000184254 | <i>ALDH1A3</i>   | 2 | 7.66E-06 | 0.000364742 | 0.22 |
| 165 | ENSG00000135451 | <i>TROAP</i>     | 2 | 7.66E-06 | 0.000364742 | 0.23 |
| 166 | ENSG00000166451 | <i>CENPN</i>     | 2 | 7.66E-06 | 0.000364742 | 0.23 |
| 167 | ENSG00000167900 | <i>TK1</i>       | 2 | 7.66E-06 | 0.000364742 | 0.23 |
| 168 | ENSG00000100297 | <i>MCM5</i>      | 2 | 7.66E-06 | 0.000364742 | 0.25 |
| 169 | ENSG00000123485 | <i>HJURP</i>     | 2 | 7.66E-06 | 0.000364742 | 0.26 |
| 170 | ENSG00000125871 | <i>MGME1</i>     | 2 | 7.66E-06 | 0.000364742 | 0.26 |
| 171 | ENSG00000183715 | <i>OPCML</i>     | 2 | 7.66E-06 | 0.000364742 | 0.26 |
| 172 | ENSG00000165480 | <i>SKA3</i>      | 2 | 7.66E-06 | 0.000364742 | 0.27 |
| 173 | ENSG00000213551 | <i>DNAJC9</i>    | 2 | 7.66E-06 | 0.000364742 | 0.27 |
| 174 | ENSG00000122566 | <i>HNRNPA2B1</i> | 2 | 7.66E-06 | 0.000364742 | 0.28 |
| 175 | ENSG00000135486 | <i>HNRNPA1</i>   | 2 | 7.66E-06 | 0.000364742 | 0.29 |
| 176 | ENSG00000137364 | <i>TPMT</i>      | 2 | 7.66E-06 | 0.000364742 | 0.29 |
| 177 | ENSG00000169679 | <i>BUB1</i>      | 2 | 7.66E-06 | 0.000364742 | 0.29 |
| 178 | ENSG00000104368 | <i>PLAT</i>      | 2 | 7.66E-06 | 0.000364742 | 0.3  |
| 179 | ENSG00000144959 | <i>NCEH1</i>     | 2 | 7.66E-06 | 0.000364742 | 0.3  |
| 180 | ENSG00000151725 | <i>CENPU</i>     | 2 | 7.66E-06 | 0.000364742 | 0.3  |
| 181 | ENSG00000154839 | <i>SKA1</i>      | 2 | 7.66E-06 | 0.000364742 | 0.3  |
| 182 | ENSG00000169436 | <i>COL22A1</i>   | 2 | 7.66E-06 | 0.000364742 | 0.3  |
| 183 | ENSG00000189001 | <i>SBSN</i>      | 2 | 7.66E-06 | 0.000364742 | 0.3  |
| 184 | ENSG00000138018 | <i>SELENOI</i>   | 2 | 7.66E-06 | 0.000364742 | 0.31 |
| 185 | ENSG00000164985 | <i>PSIP1</i>     | 2 | 7.66E-06 | 0.000364742 | 0.31 |

|     |                 |          |   |          |             |      |
|-----|-----------------|----------|---|----------|-------------|------|
| 186 | ENSG00000116120 | FARSB    | 2 | 7.66E-06 | 0.000364742 | 0.32 |
| 187 | ENSG00000137807 | KIF23    | 2 | 7.66E-06 | 0.000364742 | 0.32 |
| 188 | ENSG00000165490 | DDIAS    | 2 | 7.66E-06 | 0.000364742 | 0.32 |
| 189 | ENSG00000104691 | UBXN8    | 2 | 7.66E-06 | 0.000364742 | 0.33 |
| 190 | ENSG00000196460 | RFX8     | 2 | 7.66E-06 | 0.000364742 | 0.33 |
| 191 | ENSG00000162746 | FCRLB    | 2 | 7.66E-06 | 0.000364742 | 0.34 |
| 192 | ENSG00000171723 | GPHN     | 2 | 7.66E-06 | 0.000364742 | 0.34 |
| 193 | ENSG00000173085 | COQ2     | 2 | 7.66E-06 | 0.000364742 | 0.34 |
| 194 | ENSG00000174442 | ZWILCH   | 2 | 7.66E-06 | 0.000364742 | 0.34 |
| 195 | ENSG00000117399 | CDC20    | 2 | 7.66E-06 | 0.000364742 | 0.35 |
| 196 | ENSG00000169258 | GPRIN1   | 2 | 7.66E-06 | 0.000364742 | 0.35 |
| 197 | ENSG00000186871 | ERC6L    | 2 | 7.66E-06 | 0.000364742 | 0.35 |
| 198 | ENSG00000089006 | SNX5     | 2 | 7.66E-06 | 0.000364742 | 0.36 |
| 199 | ENSG00000100065 | CARD10   | 2 | 7.66E-06 | 0.000364742 | 0.36 |
| 200 | ENSG00000115840 | SLC25A12 | 2 | 7.66E-06 | 0.000364742 | 0.36 |
| 201 | ENSG00000136108 | CKAP2    | 2 | 7.66E-06 | 0.000364742 | 0.36 |
| 202 | ENSG00000154027 | AK5      | 2 | 7.66E-06 | 0.000364742 | 0.36 |
| 203 | ENSG00000167670 | CHAF1A   | 2 | 7.66E-06 | 0.000364742 | 0.36 |
| 204 | ENSG00000168917 | SLC35G2  | 2 | 7.66E-06 | 0.000364742 | 0.36 |
| 205 | ENSG00000237649 | KIFC1    | 2 | 7.66E-06 | 0.000364742 | 0.36 |
| 206 | ENSG00000073150 | PANX2    | 2 | 7.66E-06 | 0.000364742 | 0.37 |
| 207 | ENSG00000084090 | STARD7   | 2 | 7.66E-06 | 0.000364742 | 0.37 |
| 208 | ENSG00000092199 | HNRNPC   | 2 | 7.66E-06 | 0.000364742 | 0.37 |
| 209 | ENSG00000114251 | WNT5A    | 2 | 7.66E-06 | 0.000364742 | 0.37 |
| 210 | ENSG00000136045 | PWP1     | 2 | 7.66E-06 | 0.000364742 | 0.37 |
| 211 | ENSG00000166825 | ANPEP    | 2 | 7.66E-06 | 0.000364742 | 0.37 |
| 212 | ENSG00000167325 | RRM1     | 2 | 7.66E-06 | 0.000364742 | 0.37 |
| 213 | ENSG00000176692 | FOXC2    | 2 | 7.66E-06 | 0.000364742 | 0.37 |
| 214 | ENSG00000137821 | LRRC49   | 2 | 7.66E-06 | 0.000364742 | 0.38 |
| 215 | ENSG00000139318 | DUSP6    | 2 | 7.66E-06 | 0.000364742 | 0.38 |
| 216 | ENSG00000171848 | RRM2     | 2 | 7.66E-06 | 0.000364742 | 0.38 |
| 217 | ENSG00000129195 | PIMREG   | 2 | 7.66E-06 | 0.000364742 | 0.4  |
| 218 | ENSG00000076382 | SPAG5    | 2 | 7.66E-06 | 0.000364742 | 0.41 |
| 219 | ENSG00000101266 | CSNK2A1  | 2 | 7.66E-06 | 0.000364742 | 0.41 |
| 220 | ENSG00000104341 | LAPTM4B  | 2 | 7.66E-06 | 0.000364742 | 0.41 |
| 221 | ENSG00000105825 | TFPI2    | 2 | 7.66E-06 | 0.000364742 | 0.41 |
| 222 | ENSG00000174371 | EXO1     | 2 | 7.66E-06 | 0.000364742 | 0.41 |
| 223 | ENSG00000108010 | GLRX3    | 2 | 7.66E-06 | 0.000364742 | 0.42 |
| 224 | ENSG00000129055 | ANAPC13  | 2 | 7.66E-06 | 0.000364742 | 0.43 |
| 225 | ENSG00000137804 | NUSAP1   | 2 | 7.66E-06 | 0.000364742 | 0.43 |
| 226 | ENSG00000170606 | HSPA4    | 2 | 7.66E-06 | 0.000364742 | 0.43 |
| 227 | ENSG00000058866 | DGKG     | 2 | 7.66E-06 | 0.000364742 | 0.44 |
| 228 | ENSG00000117650 | NEK2     | 2 | 7.66E-06 | 0.000364742 | 0.44 |
| 229 | ENSG00000148672 | GLUD1    | 2 | 7.66E-06 | 0.000364742 | 0.44 |
| 230 | ENSG00000165280 | VCP      | 2 | 7.66E-06 | 0.000364742 | 0.44 |
| 231 | ENSG00000051341 | POLQ     | 2 | 7.66E-06 | 0.000364742 | 0.45 |
| 232 | ENSG00000134308 | YWHAQ    | 2 | 7.66E-06 | 0.000364742 | 0.45 |
| 233 | ENSG00000156970 | TUBB1B   | 2 | 7.66E-06 | 0.000364742 | 0.45 |
| 234 | ENSG00000167553 | TUBA1C   | 2 | 7.66E-06 | 0.000364742 | 0.45 |
| 235 | ENSG00000103018 | CYB5B    | 2 | 7.66E-06 | 0.000364742 | 0.46 |
| 236 | ENSG00000115363 | EVA1A    | 2 | 7.66E-06 | 0.000364742 | 0.46 |
| 237 | ENSG00000164109 | MAD2L1   | 2 | 7.66E-06 | 0.000364742 | 0.46 |
| 238 | ENSG00000187678 | SPRY4    | 2 | 7.66E-06 | 0.000364742 | 0.46 |
| 239 | ENSG00000040275 | SPDL1    | 2 | 7.66E-06 | 0.000364742 | 0.47 |
| 240 | ENSG00000160957 | RECQL4   | 2 | 7.66E-06 | 0.000364742 | 0.47 |
| 241 | ENSG00000128567 | PODXL    | 2 | 7.66E-06 | 0.000364742 | 0.48 |
| 242 | ENSG00000166851 | PLK1     | 2 | 7.66E-06 | 0.000364742 | 0.48 |
| 243 | ENSG00000105011 | ASF1B    | 2 | 7.66E-06 | 0.000364742 | 0.49 |
| 244 | ENSG00000157456 | CENB2    | 2 | 7.66E-06 | 0.000364742 | 0.49 |
| 245 | ENSG00000170312 | CDK1     | 2 | 7.66E-06 | 0.000364742 | 0.49 |
| 246 | ENSG00000276043 | UHRF1    | 2 | 7.66E-06 | 0.000364742 | 0.5  |
| 247 | ENSG00000134001 | EIF2S1   | 2 | 7.66E-06 | 0.000364742 | 0.51 |
| 248 | ENSG00000184178 | SCFD2    | 2 | 7.66E-06 | 0.000364742 | 0.51 |
| 249 | ENSG00000081059 | TCF7     | 2 | 7.66E-06 | 0.000364742 | 0.52 |
| 250 | ENSG00000147010 | SH3BP1   | 2 | 7.66E-06 | 0.000364742 | 0.52 |
| 251 | ENSG00000165304 | MELK     | 2 | 7.66E-06 | 0.000364742 | 0.52 |
| 252 | ENSG00000111247 | RAD51AP1 | 2 | 7.66E-06 | 0.000364742 | 0.53 |
| 253 | ENSG00000171208 | NETO2    | 2 | 7.66E-06 | 0.000364742 | 0.54 |
| 254 | ENSG00000066279 | ASPM     | 2 | 7.66E-06 | 0.000364742 | 0.56 |
| 255 | ENSG00000170779 | CDCA4    | 2 | 7.66E-06 | 0.000364742 | 0.56 |
| 256 | ENSG00000173692 | PSMD1    | 2 | 7.66E-06 | 0.000364742 | 0.56 |
| 257 | ENSG00000106853 | PTGR1    | 2 | 7.66E-06 | 0.000364742 | 0.57 |
| 258 | ENSG00000139842 | CUL4A    | 2 | 7.66E-06 | 0.000364742 | 0.57 |
| 259 | ENSG00000168496 | FEN1     | 2 | 7.66E-06 | 0.000364742 | 0.57 |
| 260 | ENSG00000169607 | CKAP2L   | 2 | 7.66E-06 | 0.000364742 | 0.57 |
| 261 | ENSG00000182871 | COL18A1  | 2 | 7.66E-06 | 0.000364742 | 0.57 |
| 262 | ENSG00000136122 | BORA     | 2 | 7.66E-06 | 0.000364742 | 0.58 |
| 263 | ENSG00000144583 | MARCHF4  | 2 | 7.66E-06 | 0.000364742 | 0.58 |
| 264 | ENSG00000101003 | GINS1    | 2 | 7.66E-06 | 0.000364742 | 0.59 |
| 265 | ENSG00000134057 | CCNB1    | 2 | 7.66E-06 | 0.000364742 | 0.59 |
| 266 | ENSG00000029993 | HMGB3    | 2 | 7.66E-06 | 0.000364742 | 0.6  |
| 267 | ENSG00000115648 | MLPH     | 2 | 7.66E-06 | 0.000364742 | 0.6  |
| 268 | ENSG00000138160 | KIF11    | 2 | 7.66E-06 | 0.000364742 | 0.6  |
| 269 | ENSG00000175063 | UBE2C    | 2 | 7.66E-06 | 0.000364742 | 0.6  |
| 270 | ENSG00000112984 | KIF20A   | 2 | 7.66E-06 | 0.000364742 | 0.61 |
| 271 | ENSG00000154127 | UBASH3B  | 2 | 7.66E-06 | 0.000364742 | 0.61 |
| 272 | ENSG00000169908 | TM4SF1   | 2 | 7.66E-06 | 0.000364742 | 0.61 |
| 273 | ENSG00000013810 | TACC3    | 2 | 7.66E-06 | 0.000364742 | 0.64 |
| 274 | ENSG00000165891 | E2F7     | 2 | 7.66E-06 | 0.000364742 | 0.64 |
| 275 | ENSG00000118193 | KIF14    | 2 | 7.66E-06 | 0.000364742 | 0.65 |
| 276 | ENSG00000148843 | PDCD11   | 2 | 7.66E-06 | 0.000364742 | 0.7  |
| 277 | ENSG00000163938 | GNL3     | 2 | 7.66E-06 | 0.000364742 | 0.7  |
| 278 | ENSG00000073111 | MCM2     | 2 | 7.66E-06 | 0.000364742 | 0.71 |
| 279 | ENSG00000130038 | CRACR2A  | 2 | 7.66E-06 | 0.000364742 | 0.71 |

|     |                  |          |   |             |             |      |
|-----|------------------|----------|---|-------------|-------------|------|
| 280 | ENSG00000121211  | MND1     | 2 | 7.66E-06    | 0.000364742 | 0.72 |
| 281 | ENSG00000101057  | MYBL2    | 2 | 7.66E-06    | 0.000364742 | 0.73 |
| 282 | ENSG00000104365  | IKKB     | 2 | 7.66E-06    | 0.000364742 | 0.73 |
| 283 | ENSG00000161800  | RACGAP1  | 2 | 7.66E-06    | 0.000364742 | 0.74 |
| 284 | ENSG00000108829  | LRRC59   | 2 | 7.66E-06    | 0.000364742 | 0.76 |
| 285 | ENSG00000079246  | XRCC5    | 2 | 7.66E-06    | 0.000364742 | 0.77 |
| 286 | ENSG00000128944  | KNSTRN   | 2 | 7.66E-06    | 0.000364742 | 0.77 |
| 287 | ENSG00000054356  | PTPRN    | 2 | 7.66E-06    | 0.000364742 | 0.8  |
| 288 | ENSG00000111665  | CDCA3    | 2 | 7.66E-06    | 0.000364742 | 0.8  |
| 289 | ENSG00000135316  | SYNCRIP  | 2 | 7.66E-06    | 0.000364742 | 0.8  |
| 290 | ENSG00000182481  | KPNA2    | 2 | 7.66E-06    | 0.000364742 | 0.8  |
| 291 | ENSG00000156261  | CCT8     | 2 | 7.66E-06    | 0.000364742 | 0.86 |
| 292 | ENSG00000184445  | KNTC1    | 2 | 7.66E-06    | 0.000364742 | 0.86 |
| 293 | ENSG000000261652 | C15orf65 | 2 | 7.66E-06    | 0.000364742 | 0.86 |
| 294 | ENSG00000100280  | AP1B1    | 2 | 7.66E-06    | 0.000364742 | 0.92 |
| 295 | ENSG00000125166  | GOT2     | 2 | 7.66E-06    | 0.000364742 | 0.94 |
| 296 | ENSG00000228716  | DHFR     | 2 | 7.66E-06    | 0.000364742 | 0.94 |
| 297 | ENSG00000126787  | DLGAP5   | 2 | 7.66E-06    | 0.000364742 | 0.99 |
| 298 | ENSG00000115687  | PASK     | 2 | 7.66E-06    | 0.000364742 | 1    |
| 299 | ENSG00000101412  | E2F1     | 2 | 7.66E-06    | 0.000364742 | 1.02 |
| 300 | ENSG00000102572  | STK24    | 2 | 7.66E-06    | 0.000364742 | 1.02 |
| 301 | ENSG00000115325  | DOK1     | 2 | 7.66E-06    | 0.000364742 | 1.06 |
| 302 | ENSG00000225968  | ELFN1    | 2 | 7.66E-06    | 0.000364742 | 1.08 |
| 303 | ENSG00000128973  | CLN6     | 2 | 7.66E-06    | 0.000364742 | 1.09 |
| 304 | ENSG00000163507  | CIP2A    | 2 | 7.66E-06    | 0.000364742 | 1.09 |
| 305 | ENSG00000204899  | MZT1     | 2 | 7.66E-06    | 0.000364742 | 1.13 |
| 306 | ENSG00000123975  | CKS2     | 2 | 7.66E-06    | 0.000364742 | 1.15 |
| 307 | ENSG00000154920  | EME1     | 2 | 7.66E-06    | 0.000364742 | 1.21 |
| 308 | ENSG00000130669  | PAK4     | 2 | 7.66E-06    | 0.000364742 | 1.23 |
| 309 | ENSG00000163535  | SGO2     | 2 | 7.66E-06    | 0.000364742 | 1.27 |
| 310 | ENSG00000067533  | RRP15    | 2 | 7.66E-06    | 0.000364742 | 1.3  |
| 311 | ENSG00000164611  | PTTG1    | 2 | 7.66E-06    | 0.000364742 | 1.37 |
| 312 | ENSG00000146670  | CDCA5    | 2 | 7.66E-06    | 0.000364742 | 1.49 |
| 313 | ENSG00000115165  | CYTIP    | 2 | 7.66E-06    | 0.000364742 | 1.52 |
| 314 | ENSG00000114405  | C3orf14  | 2 | 7.66E-06    | 0.000364742 | 1.64 |
| 315 | ENSG00000166801  | FAM111A  | 2 | 7.66E-06    | 0.000364742 | 1.71 |
| 316 | ENSG00000106477  | CEP41    | 2 | 7.66E-06    | 0.000364742 | 1.74 |
| 317 | ENSG00000162063  | CCNF     | 2 | 7.66E-06    | 0.000364742 | 2.01 |
| 318 | ENSG00000120694  | HSPH1    | 2 | 7.66E-06    | 0.000364742 | 2.15 |
| 319 | ENSG00000075188  | NUP37    | 2 | 7.66E-06    | 0.000364742 | 4.3  |
| 320 | ENSG00000079462  | PAFAH1B3 | 3 | 0.000116806 | 0.002904762 | 0    |
| 321 | ENSG00000131738  | KRT33B   | 3 | 0.000116806 | 0.002904762 | 0    |
| 322 | ENSG00000132429  | POPDC3   | 3 | 0.000116806 | 0.002904762 | 0    |
| 323 | ENSG00000137776  | SLTM     | 3 | 0.000116806 | 0.002904762 | 0    |
| 324 | ENSG00000142731  | PLK4     | 3 | 0.000116806 | 0.002904762 | 0    |
| 325 | ENSG00000187957  | DNER     | 3 | 0.000116806 | 0.002904762 | 0    |
| 326 | ENSG00000196141  | SPATS2L  | 3 | 0.000116806 | 0.002904762 | 0    |
| 327 | ENSG00000241258  | CRCP     | 3 | 0.000116806 | 0.002904762 | 0    |
| 328 | ENSG00000103342  | GSPT1    | 3 | 0.000116806 | 0.002904762 | 0.01 |
| 329 | ENSG00000113739  | STC2     | 3 | 0.000116806 | 0.002904762 | 0.01 |
| 330 | ENSG00000135052  | GOLM1    | 3 | 0.000116806 | 0.002904762 | 0.01 |
| 331 | ENSG00000136518  | ACTL6A   | 3 | 0.000116806 | 0.002904762 | 0.01 |
| 332 | ENSG00000140905  | GCSH     | 3 | 0.000116806 | 0.002904762 | 0.01 |
| 333 | ENSG00000172819  | RARG     | 3 | 0.000116806 | 0.002904762 | 0.01 |
| 334 | ENSG00000184368  | MAP7D2   | 3 | 0.000116806 | 0.002904762 | 0.01 |
| 335 | ENSG00000065548  | ZC3H15   | 3 | 0.000116806 | 0.002904762 | 0.02 |
| 336 | ENSG00000069849  | ATP1B3   | 3 | 0.000116806 | 0.002904762 | 0.02 |
| 337 | ENSG00000126581  | BECN1    | 3 | 0.000116806 | 0.002904762 | 0.02 |
| 338 | ENSG00000140406  | TLNRD1   | 3 | 0.000116806 | 0.002904762 | 0.02 |
| 339 | ENSG00000188342  | FTF2F2   | 3 | 0.000116806 | 0.002904762 | 0.02 |
| 340 | ENSG00000204427  | ABHD16A  | 3 | 0.000116806 | 0.002904762 | 0.02 |
| 341 | ENSG00000170270  | GON7     | 3 | 0.000116806 | 0.002904762 | 0.03 |
| 342 | ENSG00000096384  | HSP90AB1 | 3 | 0.000116806 | 0.002904762 | 0.04 |
| 343 | ENSG00000105323  | HNRNPUL1 | 3 | 0.000116806 | 0.002904762 | 0.04 |
| 344 | ENSG00000159147  | DONSON   | 3 | 0.000116806 | 0.002904762 | 0.04 |
| 345 | ENSG00000115844  | DLX2     | 3 | 0.000116806 | 0.002904762 | 0.05 |
| 346 | ENSG00000142864  | SERBP1   | 3 | 0.000116806 | 0.002904762 | 0.06 |
| 347 | ENSG00000185414  | MRPL30   | 3 | 0.000116806 | 0.002904762 | 0.06 |
| 348 | ENSG00000100418  | DES1     | 3 | 0.000116806 | 0.002904762 | 0.08 |
| 349 | ENSG00000104356  | POP1     | 3 | 0.000116806 | 0.002904762 | 0.08 |
| 350 | ENSG00000175110  | MRPS22   | 3 | 0.000116806 | 0.002904762 | 0.08 |
| 351 | ENSG00000125398  | SOX9     | 3 | 0.000116806 | 0.002904762 | 0.09 |
| 352 | ENSG00000130052  | STARD8   | 3 | 0.000116806 | 0.002904762 | 0.09 |
| 353 | ENSG00000178878  | APOLD1   | 3 | 0.000116806 | 0.002904762 | 0.09 |
| 354 | ENSG00000053900  | ANAPC4   | 3 | 0.000116806 | 0.002904762 | 0.1  |
| 355 | ENSG00000109685  | NSD2     | 3 | 0.000116806 | 0.002904762 | 0.1  |
| 356 | ENSG00000118939  | UCLH3    | 3 | 0.000116806 | 0.002904762 | 0.1  |
| 357 | ENSG00000127948  | POR      | 3 | 0.000116806 | 0.002904762 | 0.1  |
| 358 | ENSG00000204520  | MICA     | 3 | 0.000116806 | 0.002904762 | 0.1  |
| 359 | ENSG00000004866  | ST7      | 3 | 0.000116806 | 0.002904762 | 0.11 |
| 360 | ENSG00000100519  | PSMCG    | 3 | 0.000116806 | 0.002904762 | 0.11 |
| 361 | ENSG00000135723  | FHOD1    | 3 | 0.000116806 | 0.002904762 | 0.11 |
| 362 | ENSG00000149503  | INCENP   | 3 | 0.000116806 | 0.002904762 | 0.11 |
| 363 | ENSG00000196550  | FAM72A   | 3 | 0.000116806 | 0.002904762 | 0.11 |
| 364 | ENSG00000173848  | NET1     | 3 | 0.000116806 | 0.002904762 | 0.12 |
| 365 | ENSG00000125885  | MCM8     | 3 | 0.000116806 | 0.002904762 | 0.13 |
| 366 | ENSG00000100522  | GNPNAT1  | 3 | 0.000116806 | 0.002904762 | 0.15 |
| 367 | ENSG00000146918  | NCAPG2   | 3 | 0.000116806 | 0.002904762 | 0.15 |
| 368 | ENSG00000149480  | MTA2     | 3 | 0.000116806 | 0.002904762 | 0.16 |
| 369 | ENSG00000160072  | ATAD3B   | 3 | 0.000116806 | 0.002904762 | 0.16 |
| 370 | ENSG00000166401  | SERPINB8 | 3 | 0.000116806 | 0.002904762 | 0.16 |
| 371 | ENSG00000206053  | JPT2     | 3 | 0.000116806 | 0.002904762 | 0.16 |
| 372 | ENSG00000278259  | MYO19    | 3 | 0.000116806 | 0.002904762 | 0.16 |
| 373 | ENSG00000177663  | IL17RA   | 3 | 0.000116806 | 0.002904762 | 0.17 |

|     |                 |          |   |             |             |      |
|-----|-----------------|----------|---|-------------|-------------|------|
| 374 | ENSG00000086827 | ZW10     | 3 | 0.000116806 | 0.002904762 | 0.18 |
| 375 | ENSG00000154328 | NEIL2    | 3 | 0.000116806 | 0.002904762 | 0.18 |
| 376 | ENSG00000032389 | EIPR1    | 3 | 0.000116806 | 0.002904762 | 0.2  |
| 377 | ENSG00000107554 | DNMBP    | 3 | 0.000116806 | 0.002904762 | 0.2  |
| 378 | ENSG00000155959 | VBP1     | 3 | 0.000116806 | 0.002904762 | 0.2  |
| 379 | ENSG00000197299 | BLM      | 3 | 0.000116806 | 0.002904762 | 0.2  |
| 380 | ENSG00000111231 | GNP3     | 3 | 0.000116806 | 0.002904762 | 0.21 |
| 381 | ENSG00000114850 | SSR3     | 3 | 0.000116806 | 0.002904762 | 0.21 |
| 382 | ENSG00000160211 | G6PD     | 3 | 0.000116806 | 0.002904762 | 0.21 |
| 383 | ENSG00000173674 | E1F1AX   | 3 | 0.000116806 | 0.002904762 | 0.22 |
| 384 | ENSG00000177426 | TGIF1    | 3 | 0.000116806 | 0.002904762 | 0.22 |
| 385 | ENSG00000204267 | TAP2     | 3 | 0.000116806 | 0.002904762 | 0.22 |
| 386 | ENSG00000122565 | CBX3     | 3 | 0.000116806 | 0.002904762 | 0.23 |
| 387 | ENSG00000166813 | KIF7     | 3 | 0.000116806 | 0.002904762 | 0.24 |
| 388 | ENSG00000185480 | PARBP    | 3 | 0.000116806 | 0.002904762 | 0.24 |
| 389 | ENSG00000012048 | BRCA1    | 3 | 0.000116806 | 0.002904762 | 0.25 |
| 390 | ENSG00000107611 | CUBN     | 3 | 0.000116806 | 0.002904762 | 0.25 |
| 391 | ENSG00000164087 | POC1A    | 3 | 0.000116806 | 0.002904762 | 0.25 |
| 392 | ENSG00000176102 | CSTF3    | 3 | 0.000116806 | 0.002904762 | 0.25 |
| 393 | ENSG00000094916 | CBX5     | 3 | 0.000116806 | 0.002904762 | 0.26 |
| 394 | ENSG00000111142 | METAP2   | 3 | 0.000116806 | 0.002904762 | 0.26 |
| 395 | ENSG00000111252 | SH2B3    | 3 | 0.000116806 | 0.002904762 | 0.26 |
| 396 | ENSG00000136699 | SMPD4    | 3 | 0.000116806 | 0.002904762 | 0.26 |
| 397 | ENSG00000108883 | EFTUD2   | 3 | 0.000116806 | 0.002904762 | 0.27 |
| 398 | ENSG00000123416 | TUBA1B   | 3 | 0.000116806 | 0.002904762 | 0.27 |
| 399 | ENSG00000134287 | ARF3     | 3 | 0.000116806 | 0.002904762 | 0.28 |
| 400 | ENSG00000164024 | METAP1   | 3 | 0.000116806 | 0.002904762 | 0.28 |
| 401 | ENSG00000271605 | MILR1    | 3 | 0.000116806 | 0.002904762 | 0.28 |
| 402 | ENSG00000064393 | HIPK2    | 3 | 0.000116806 | 0.002904762 | 0.29 |
| 403 | ENSG00000145386 | CCNA2    | 3 | 0.000116806 | 0.002904762 | 0.29 |
| 404 | ENSG00000162607 | USP1     | 3 | 0.000116806 | 0.002904762 | 0.29 |
| 405 | ENSG00000164045 | CDC25A   | 3 | 0.000116806 | 0.002904762 | 0.29 |
| 406 | ENSG00000177542 | SLC25A22 | 3 | 0.000116806 | 0.002904762 | 0.29 |
| 407 | ENSG00000121390 | PSPC1    | 3 | 0.000116806 | 0.002904762 | 0.3  |
| 408 | ENSG00000177731 | FLII     | 3 | 0.000116806 | 0.002904762 | 0.3  |
| 409 | ENSG00000278535 | DHRS11   | 3 | 0.000116806 | 0.002904762 | 0.3  |
| 410 | ENSG00000074527 | NTN4     | 3 | 0.000116806 | 0.002904762 | 0.31 |
| 411 | ENSG00000092470 | WDR76    | 3 | 0.000116806 | 0.002904762 | 0.31 |
| 412 | ENSG00000160877 | NACC1    | 3 | 0.000116806 | 0.002904762 | 0.31 |
| 413 | ENSG00000054282 | SDCCAG8  | 3 | 0.000116806 | 0.002904762 | 0.32 |
| 414 | ENSG00000164934 | DCAF13   | 3 | 0.000116806 | 0.002904762 | 0.32 |
| 415 | ENSG00000088826 | SMOX     | 3 | 0.000116806 | 0.002904762 | 0.33 |
| 416 | ENSG00000092201 | SUPT16H  | 3 | 0.000116806 | 0.002904762 | 0.33 |
| 417 | ENSG00000136897 | MRPL50   | 3 | 0.000116806 | 0.002904762 | 0.33 |
| 418 | ENSG00000184007 | PTP4A2   | 3 | 0.000116806 | 0.002904762 | 0.33 |
| 419 | ENSG00000188976 | NOC2L    | 3 | 0.000116806 | 0.002904762 | 0.33 |
| 420 | ENSG00000041802 | LSG1     | 3 | 0.000116806 | 0.002904762 | 0.34 |
| 421 | ENSG00000100749 | VRK1     | 3 | 0.000116806 | 0.002904762 | 0.34 |
| 422 | ENSG00000112118 | MCM3     | 3 | 0.000116806 | 0.002904762 | 0.34 |
| 423 | ENSG00000112742 | TTK      | 3 | 0.000116806 | 0.002904762 | 0.34 |
| 424 | ENSG00000123219 | CENPK    | 3 | 0.000116806 | 0.002904762 | 0.34 |
| 425 | ENSG00000145337 | PYURF    | 3 | 0.000116806 | 0.002904762 | 0.34 |
| 426 | ENSG00000175352 | NRIP3    | 3 | 0.000116806 | 0.002904762 | 0.34 |
| 427 | ENSG00000014216 | CAPN1    | 3 | 0.000116806 | 0.002904762 | 0.35 |
| 428 | ENSG00000028116 | VRK2     | 3 | 0.000116806 | 0.002904762 | 0.35 |
| 429 | ENSG00000133119 | RFC3     | 3 | 0.000116806 | 0.002904762 | 0.35 |
| 430 | ENSG00000166562 | SEC11C   | 3 | 0.000116806 | 0.002904762 | 0.35 |
| 431 | ENSG00000188610 | FAM72B   | 3 | 0.000116806 | 0.002904762 | 0.35 |
| 432 | ENSG00000138430 | OLA1     | 3 | 0.000116806 | 0.002904762 | 0.36 |
| 433 | ENSG00000147100 | SLC16A2  | 3 | 0.000116806 | 0.002904762 | 0.36 |
| 434 | ENSG00000150551 | LYPD1    | 3 | 0.000116806 | 0.002904762 | 0.36 |
| 435 | ENSG00000166913 | YWHAB    | 3 | 0.000116806 | 0.002904762 | 0.36 |
| 436 | ENSG00000243725 | TTC4     | 3 | 0.000116806 | 0.002904762 | 0.36 |
| 437 | ENSG00000107949 | BCCIP    | 3 | 0.000116806 | 0.002904762 | 0.37 |
| 438 | ENSG00000108511 | HOXB6    | 3 | 0.000116806 | 0.002904762 | 0.37 |
| 439 | ENSG00000143476 | DTL      | 3 | 0.000116806 | 0.002904762 | 0.37 |
| 440 | ENSG00000149262 | INTS4    | 3 | 0.000116806 | 0.002904762 | 0.37 |
| 441 | ENSG00000176619 | LMNB2    | 3 | 0.000116806 | 0.002904762 | 0.37 |
| 442 | ENSG00000273841 | TAF9     | 3 | 0.000116806 | 0.002904762 | 0.37 |
| 443 | ENSG00000080824 | HSP90AA1 | 3 | 0.000116806 | 0.002904762 | 0.38 |
| 444 | ENSG00000157111 | TMEM171  | 3 | 0.000116806 | 0.002904762 | 0.38 |
| 445 | ENSG00000164924 | YWHAZ    | 3 | 0.000116806 | 0.002904762 | 0.38 |
| 446 | ENSG00000175792 | RUVBL1   | 3 | 0.000116806 | 0.002904762 | 0.38 |
| 447 | ENSG00000189057 | FAM111B  | 3 | 0.000116806 | 0.002904762 | 0.38 |
| 448 | ENSG00000059691 | GATB     | 3 | 0.000116806 | 0.002904762 | 0.39 |
| 449 | ENSG00000075702 | WDR62    | 3 | 0.000116806 | 0.002904762 | 0.39 |
| 450 | ENSG00000100479 | POLE2    | 3 | 0.000116806 | 0.002904762 | 0.39 |
| 451 | ENSG00000175643 | RMI2     | 3 | 0.000116806 | 0.002904762 | 0.39 |
| 452 | ENSG00000091140 | DLD      | 3 | 0.000116806 | 0.002904762 | 0.4  |
| 453 | ENSG00000091483 | FH       | 3 | 0.000116806 | 0.002904762 | 0.4  |
| 454 | ENSG00000125319 | C17orf53 | 3 | 0.000116806 | 0.002904762 | 0.4  |
| 455 | ENSG00000127920 | GNG11    | 3 | 0.000116806 | 0.002904762 | 0.4  |
| 456 | ENSG00000128606 | LRRC17   | 3 | 0.000116806 | 0.002904762 | 0.4  |
| 457 | ENSG00000135047 | CTSL     | 3 | 0.000116806 | 0.002904762 | 0.4  |
| 458 | ENSG00000166197 | NOLC1    | 3 | 0.000116806 | 0.002904762 | 0.41 |
| 459 | ENSG00000121621 | KIF18A   | 3 | 0.000116806 | 0.002904762 | 0.42 |
| 460 | ENSG00000130340 | SNX9     | 3 | 0.000116806 | 0.002904762 | 0.42 |
| 461 | ENSG00000162618 | ADGRL4   | 3 | 0.000116806 | 0.002904762 | 0.42 |
| 462 | ENSG00000187699 | C2orf88  | 3 | 0.000116806 | 0.002904762 | 0.42 |
| 463 | ENSG00000066117 | SMARCD1  | 3 | 0.000116806 | 0.002904762 | 0.43 |
| 464 | ENSG00000100813 | ACIN1    | 3 | 0.000116806 | 0.002904762 | 0.44 |
| 465 | ENSG00000159055 | MIS18A   | 3 | 0.000116806 | 0.002904762 | 0.44 |
| 466 | ENSG00000198331 | HYLS1    | 3 | 0.000116806 | 0.002904762 | 0.44 |
| 467 | ENSG00000177479 | ARIH2    | 3 | 0.000116806 | 0.002904762 | 0.45 |

|     |                 |          |   |             |             |      |
|-----|-----------------|----------|---|-------------|-------------|------|
| 468 | ENSG00000043143 | JADE2    | 3 | 0.000116806 | 0.002904762 | 0.46 |
| 469 | ENSG00000061794 | MRPS35   | 3 | 0.000116806 | 0.002904762 | 0.46 |
| 470 | ENSG00000101945 | SUV39H1  | 3 | 0.000116806 | 0.002904762 | 0.46 |
| 471 | ENSG00000109332 | UBE2D3   | 3 | 0.000116806 | 0.002904762 | 0.46 |
| 472 | ENSG00000125347 | IRF1     | 3 | 0.000116806 | 0.002904762 | 0.46 |
| 473 | ENSG00000139620 | KANSL2   | 3 | 0.000116806 | 0.002904762 | 0.47 |
| 474 | ENSG00000228672 | PROB1    | 3 | 0.000116806 | 0.002904762 | 0.47 |
| 475 | ENSG00000235162 | C12orf75 | 3 | 0.000116806 | 0.002904762 | 0.47 |
| 476 | ENSG00000174238 | PITPNA   | 3 | 0.000116806 | 0.002904762 | 0.48 |
| 477 | ENSG00000103326 | CAPN15   | 3 | 0.000116806 | 0.002904762 | 0.49 |
| 478 | ENSG00000134690 | CDCA8    | 3 | 0.000116806 | 0.002904762 | 0.49 |
| 479 | ENSG00000162959 | MEMO1    | 3 | 0.000116806 | 0.002904762 | 0.49 |
| 480 | ENSG00000196155 | PLEKHG4  | 3 | 0.000116806 | 0.002904762 | 0.49 |
| 481 | ENSG00000086189 | DIMT1    | 3 | 0.000116806 | 0.002904762 | 0.5  |
| 482 | ENSG00000087263 | OGFOD1   | 3 | 0.000116806 | 0.002904762 | 0.5  |
| 483 | ENSG00000142002 | DPP9     | 3 | 0.000116806 | 0.002904762 | 0.5  |
| 484 | ENSG00000142230 | SAE1     | 3 | 0.000116806 | 0.002904762 | 0.5  |
| 485 | ENSG00000147419 | CCDC25   | 3 | 0.000116806 | 0.002904762 | 0.5  |
| 486 | ENSG00000101638 | ST8SIA5  | 3 | 0.000116806 | 0.002904762 | 0.51 |
| 487 | ENSG00000115163 | CENPA    | 3 | 0.000116806 | 0.002904762 | 0.51 |
| 488 | ENSG00000124126 | PREX1    | 3 | 0.000116806 | 0.002904762 | 0.51 |
| 489 | ENSG00000058056 | USP13    | 3 | 0.000116806 | 0.002904762 | 0.52 |
| 490 | ENSG00000197451 | HNRNPAB  | 3 | 0.000116806 | 0.002904762 | 0.52 |
| 491 | ENSG00000205208 | C4orf46  | 3 | 0.000116806 | 0.002904762 | 0.52 |
| 492 | ENSG00000212724 | KRTAP2-3 | 3 | 0.000116806 | 0.002904762 | 0.52 |
| 493 | ENSG00000284969 | n_a      | 3 | 0.000116806 | 0.002904762 | 0.52 |
| 494 | ENSG00000101868 | POLA1    | 3 | 0.000116806 | 0.002904762 | 0.53 |
| 495 | ENSG00000157193 | LRP8     | 3 | 0.000116806 | 0.002904762 | 0.53 |
| 496 | ENSG00000168273 | SMIM4    | 3 | 0.000116806 | 0.002904762 | 0.53 |
| 497 | ENSG00000182585 | EPGN     | 3 | 0.000116806 | 0.002904762 | 0.53 |
| 498 | ENSG00000141349 | G6PC3    | 3 | 0.000116806 | 0.002904762 | 0.54 |
| 499 | ENSG00000176170 | n_a      | 3 | 0.000116806 | 0.002904762 | 0.54 |
| 500 | ENSG00000058804 | NDG1     | 3 | 0.000116806 | 0.002904762 | 0.55 |
| 501 | ENSG00000130638 | ATXN10   | 3 | 0.000116806 | 0.002904762 | 0.55 |
| 502 | ENSG00000137868 | STRA6    | 3 | 0.000116806 | 0.002904762 | 0.55 |
| 503 | ENSG00000110031 | LPXN     | 3 | 0.000116806 | 0.002904762 | 0.56 |
| 504 | ENSG00000116761 | CTH      | 3 | 0.000116806 | 0.002904762 | 0.56 |
| 505 | ENSG00000154473 | BUB3     | 3 | 0.000116806 | 0.002904762 | 0.56 |
| 506 | ENSG00000204394 | VARS     | 3 | 0.000116806 | 0.002904762 | 0.56 |
| 507 | ENSG00000047634 | SCML1    | 3 | 0.000116806 | 0.002904762 | 0.57 |
| 508 | ENSG00000083099 | LYRM2    | 3 | 0.000116806 | 0.002904762 | 0.57 |
| 509 | ENSG00000112541 | PDE10A   | 3 | 0.000116806 | 0.002904762 | 0.57 |
| 510 | ENSG00000124207 | CSE1L    | 3 | 0.000116806 | 0.002904762 | 0.57 |
| 511 | ENSG00000138092 | CENPO    | 3 | 0.000116806 | 0.002904762 | 0.57 |
| 512 | ENSG00000187688 | TRPV2    | 3 | 0.000116806 | 0.002904762 | 0.57 |
| 513 | ENSG00000262655 | SPON1    | 3 | 0.000116806 | 0.002904762 | 0.57 |
| 514 | ENSG00000093217 | XYLB     | 3 | 0.000116806 | 0.002904762 | 0.58 |
| 515 | ENSG00000114346 | ECT2     | 3 | 0.000116806 | 0.002904762 | 0.58 |
| 516 | ENSG00000135318 | NTSE     | 3 | 0.000116806 | 0.002904762 | 0.58 |
| 517 | ENSG00000221944 | TIGD1    | 3 | 0.000116806 | 0.002904762 | 0.58 |
| 518 | ENSG00000079785 | DDX1     | 3 | 0.000116806 | 0.002904762 | 0.59 |
| 519 | ENSG00000080573 | COL5A3   | 3 | 0.000116806 | 0.002904762 | 0.59 |
| 520 | ENSG00000115758 | ODC1     | 3 | 0.000116806 | 0.002904762 | 0.59 |
| 521 | ENSG00000130826 | DKC1     | 3 | 0.000116806 | 0.002904762 | 0.59 |
| 522 | ENSG00000117593 | DARS2    | 3 | 0.000116806 | 0.002904762 | 0.6  |
| 523 | ENSG00000130985 | UBA1     | 3 | 0.000116806 | 0.002904762 | 0.6  |
| 524 | ENSG00000161204 | ABCF3    | 3 | 0.000116806 | 0.002904762 | 0.6  |
| 525 | ENSG00000183814 | LIN9     | 3 | 0.000116806 | 0.002904762 | 0.6  |
| 526 | ENSG00000065150 | IPO5     | 3 | 0.000116806 | 0.002904762 | 0.61 |
| 527 | ENSG00000123178 | SPRYD7   | 3 | 0.000116806 | 0.002904762 | 0.61 |
| 528 | ENSG00000152784 | PRDM8    | 3 | 0.000116806 | 0.002904762 | 0.61 |
| 529 | ENSG00000173153 | ESRRA    | 3 | 0.000116806 | 0.002904762 | 0.61 |
| 530 | ENSG00000214357 | NEURL1B  | 3 | 0.000116806 | 0.002904762 | 0.61 |
| 531 | ENSG00000010292 | NCAPD2   | 3 | 0.000116806 | 0.002904762 | 0.62 |
| 532 | ENSG00000091651 | ORC6     | 3 | 0.000116806 | 0.002904762 | 0.62 |
| 533 | ENSG00000166226 | CCT2     | 3 | 0.000116806 | 0.002904762 | 0.62 |
| 534 | ENSG00000077721 | UBE2A    | 3 | 0.000116806 | 0.002904762 | 0.63 |
| 535 | ENSG00000011304 | PTBP1    | 3 | 0.000116806 | 0.002904762 | 0.64 |
| 536 | ENSG00000081051 | AFP      | 3 | 0.000116806 | 0.002904762 | 0.64 |
| 537 | ENSG00000104907 | TRMT1    | 3 | 0.000116806 | 0.002904762 | 0.64 |
| 538 | ENSG00000167513 | CDT1     | 3 | 0.000116806 | 0.002904762 | 0.64 |
| 539 | ENSG00000095319 | NUP188   | 3 | 0.000116806 | 0.002904762 | 0.65 |
| 540 | ENSG00000105486 | LIG1     | 3 | 0.000116806 | 0.002904762 | 0.65 |
| 541 | ENSG00000133134 | BEX2     | 3 | 0.000116806 | 0.002904762 | 0.65 |
| 542 | ENSG00000139354 | GAS2L3   | 3 | 0.000116806 | 0.002904762 | 0.65 |
| 543 | ENSG00000065923 | SLC9A7   | 3 | 0.000116806 | 0.002904762 | 0.66 |
| 544 | ENSG00000090061 | CCNK     | 3 | 0.000116806 | 0.002904762 | 0.66 |
| 545 | ENSG00000110274 | CEP164   | 3 | 0.000116806 | 0.002904762 | 0.66 |
| 546 | ENSG00000140740 | UQCRC2   | 3 | 0.000116806 | 0.002904762 | 0.66 |
| 547 | ENSG00000057252 | SOAT1    | 3 | 0.000116806 | 0.002904762 | 0.67 |
| 548 | ENSG00000127586 | CHTF18   | 3 | 0.000116806 | 0.002904762 | 0.67 |
| 549 | ENSG00000149948 | HMGGA2   | 3 | 0.000116806 | 0.002904762 | 0.68 |
| 550 | ENSG00000145907 | G3BP1    | 3 | 0.000116806 | 0.002904762 | 0.69 |
| 551 | ENSG00000100664 | EIF5     | 3 | 0.000116806 | 0.002904762 | 0.7  |
| 552 | ENSG00000138180 | CEP55    | 3 | 0.000116806 | 0.002904762 | 0.7  |
| 553 | ENSG00000164283 | ESM1     | 3 | 0.000116806 | 0.002904762 | 0.7  |
| 554 | ENSG00000103995 | CEP152   | 3 | 0.000116806 | 0.002904762 | 0.71 |
| 555 | ENSG00000145833 | DDX46    | 3 | 0.000116806 | 0.002904762 | 0.71 |
| 556 | ENSG00000108691 | CCL2     | 3 | 0.000116806 | 0.002904762 | 0.73 |
| 557 | ENSG00000146731 | CCT6A    | 3 | 0.000116806 | 0.002904762 | 0.73 |
| 558 | ENSG00000131462 | TUBG1    | 3 | 0.000116806 | 0.002904762 | 0.74 |
| 559 | ENSG00000148634 | HERC4    | 3 | 0.000116806 | 0.002904762 | 0.74 |
| 560 | ENSG00000154319 | FAM167A  | 3 | 0.000116806 | 0.002904762 | 0.74 |
| 561 | ENSG00000197046 | SIGLEC15 | 3 | 0.000116806 | 0.002904762 | 0.74 |

|     |                 |          |   |             |             |      |
|-----|-----------------|----------|---|-------------|-------------|------|
| 562 | ENSG00000057019 | DCBLD2   | 3 | 0.000116806 | 0.002904762 | 0.75 |
| 563 | ENSG00000111058 | ACSS3    | 3 | 0.000116806 | 0.002904762 | 0.75 |
| 564 | ENSG00000115290 | GRB14    | 3 | 0.000116806 | 0.002904762 | 0.75 |
| 565 | ENSG00000130270 | ATP8B3   | 3 | 0.000116806 | 0.002904762 | 0.75 |
| 566 | ENSG00000138778 | CENPE    | 3 | 0.000116806 | 0.002904762 | 0.75 |
| 567 | ENSG00000161888 | SPC24    | 3 | 0.000116806 | 0.002904762 | 0.76 |
| 568 | ENSG00000106462 | EZH2     | 3 | 0.000116806 | 0.002904762 | 0.78 |
| 569 | ENSG00000164318 | EGFLAM   | 3 | 0.000116806 | 0.002904762 | 0.78 |
| 570 | ENSG00000198824 | CHAMP1   | 3 | 0.000116806 | 0.002904762 | 0.78 |
| 571 | ENSG00000079435 | LIPE     | 3 | 0.000116806 | 0.002904762 | 0.79 |
| 572 | ENSG00000144040 | SFXN5    | 3 | 0.000116806 | 0.002904762 | 0.8  |
| 573 | ENSG00000164543 | STK17A   | 3 | 0.000116806 | 0.002904762 | 0.8  |
| 574 | ENSG00000211460 | TSN      | 3 | 0.000116806 | 0.002904762 | 0.8  |
| 575 | ENSG00000154928 | EPHB1    | 3 | 0.000116806 | 0.002904762 | 0.83 |
| 576 | ENSG00000078618 | NRDC     | 3 | 0.000116806 | 0.002904762 | 0.87 |
| 577 | ENSG00000121152 | NCAPH    | 3 | 0.000116806 | 0.002904762 | 0.87 |
| 578 | ENSG00000136875 | PRPF4    | 3 | 0.000116806 | 0.002904762 | 0.91 |
| 579 | ENSG00000138035 | PNPT1    | 3 | 0.000116806 | 0.002904762 | 0.92 |
| 580 | ENSG00000144554 | FANCD2   | 3 | 0.000116806 | 0.002904762 | 0.94 |
| 581 | ENSG00000104147 | OIP5     | 3 | 0.000116806 | 0.002904762 | 0.97 |
| 582 | ENSG00000197208 | SLC22A4  | 3 | 0.000116806 | 0.002904762 | 0.97 |
| 583 | ENSG00000132603 | NIP7     | 3 | 0.000116806 | 0.002904762 | 0.99 |
| 584 | ENSG00000170144 | HNRNPA3  | 3 | 0.000116806 | 0.002904762 | 1.02 |
| 585 | ENSG00000109084 | TMEM97   | 3 | 0.000116806 | 0.002904762 | 1.06 |
| 586 | ENSG00000176834 | VSIG10   | 3 | 0.000116806 | 0.002904762 | 1.07 |
| 587 | ENSG00000117632 | STMN1    | 3 | 0.000116806 | 0.002904762 | 1.09 |
| 588 | ENSG00000070950 | RAD18    | 3 | 0.000116806 | 0.002904762 | 1.1  |
| 589 | ENSG00000138678 | GPAT3    | 3 | 0.000116806 | 0.002904762 | 1.11 |
| 590 | ENSG00000178726 | THBD     | 3 | 0.000116806 | 0.002904762 | 1.12 |
| 591 | ENSG00000136114 | THSD1    | 3 | 0.000116806 | 0.002904762 | 1.14 |
| 592 | ENSG00000051180 | RAD51    | 3 | 0.000116806 | 0.002904762 | 1.2  |
| 593 | ENSG00000094804 | CDC6     | 3 | 0.000116806 | 0.002904762 | 1.23 |
| 594 | ENSG00000142867 | BCL10    | 3 | 0.000116806 | 0.002904762 | 1.23 |
| 595 | ENSG00000180730 | SHISA2   | 3 | 0.000116806 | 0.002904762 | 1.24 |
| 596 | ENSG00000118777 | ABCG2    | 3 | 0.000116806 | 0.002904762 | 1.38 |
| 597 | ENSG00000133216 | EPHB2    | 3 | 0.000116806 | 0.002904762 | 1.47 |
| 598 | ENSG00000144034 | TPRKB    | 3 | 0.000116806 | 0.002904762 | 1.47 |
| 599 | ENSG00000058085 | LAMC2    | 3 | 0.000116806 | 0.002904762 | 1.53 |
| 600 | ENSG00000185862 | EVI2B    | 3 | 0.000116806 | 0.002904762 | 1.57 |
| 601 | ENSG00000144118 | RALB     | 3 | 0.000116806 | 0.002904762 | 1.67 |
| 602 | ENSG00000163376 | KBTBD8   | 3 | 0.000116806 | 0.002904762 | 1.75 |
| 603 | ENSG00000140105 | WARS     | 3 | 0.000116806 | 0.002904762 | 1.83 |
| 604 | ENSG00000197594 | ENPP1    | 3 | 0.000116806 | 0.002904762 | 1.88 |
| 605 | ENSG00000161381 | PLXDC1   | 3 | 0.000116806 | 0.002904762 | 1.96 |
| 606 | ENSG00000197632 | SERPINB2 | 3 | 0.000116806 | 0.002904762 | 1.96 |
| 607 | ENSG00000006468 | ETV1     | 3 | 0.000116806 | 0.002904762 | 2.04 |
| 608 | ENSG00000160886 | LY6K     | 3 | 0.000116806 | 0.002904762 | 2.05 |
| 609 | ENSG00000181195 | PENK     | 3 | 0.000116806 | 0.002904762 | 2.3  |
| 610 | ENSG00000121289 | CEP89    | 3 | 0.000116806 | 0.002904762 | 2.45 |
| 611 | ENSG00000064419 | TNPO3    | 4 | 0.001232527 | 0.017830102 | 0    |
| 612 | ENSG00000082153 | BZW1     | 4 | 0.001232527 | 0.017830102 | 0    |
| 613 | ENSG00000101019 | UQC1     | 4 | 0.001232527 | 0.017830102 | 0    |
| 614 | ENSG00000109606 | DHX15    | 4 | 0.001232527 | 0.017830102 | 0    |
| 615 | ENSG00000115875 | SRSF7    | 4 | 0.001232527 | 0.017830102 | 0    |
| 616 | ENSG00000116459 | ATP5PB   | 4 | 0.001232527 | 0.017830102 | 0    |
| 617 | ENSG00000129810 | SGO1     | 4 | 0.001232527 | 0.017830102 | 0    |
| 618 | ENSG00000134186 | PRPF38B  | 4 | 0.001232527 | 0.017830102 | 0    |
| 619 | ENSG00000138675 | FGF5     | 4 | 0.001232527 | 0.017830102 | 0    |
| 620 | ENSG00000138698 | RAP1GDS1 | 4 | 0.001232527 | 0.017830102 | 0    |
| 621 | ENSG00000143816 | WNT9A    | 4 | 0.001232527 | 0.017830102 | 0    |
| 622 | ENSG00000144355 | DLX1     | 4 | 0.001232527 | 0.017830102 | 0    |
| 623 | ENSG00000154736 | ADAMTSS  | 4 | 0.001232527 | 0.017830102 | 0    |
| 624 | ENSG00000167491 | GATAD2A  | 4 | 0.001232527 | 0.017830102 | 0    |
| 625 | ENSG00000174791 | RIN1     | 4 | 0.001232527 | 0.017830102 | 0    |
| 626 | ENSG00000175505 | CLCF1    | 4 | 0.001232527 | 0.017830102 | 0    |
| 627 | ENSG00000175573 | C11orf68 | 4 | 0.001232527 | 0.017830102 | 0    |
| 628 | ENSG00000187555 | USP7     | 4 | 0.001232527 | 0.017830102 | 0    |
| 629 | ENSG00000196678 | ERL2     | 4 | 0.001232527 | 0.017830102 | 0    |
| 630 | ENSG00000197142 | ACSL5    | 4 | 0.001232527 | 0.017830102 | 0    |
| 631 | ENSG00000198763 | MT-ND2   | 4 | 0.001232527 | 0.017830102 | 0    |
| 632 | ENSG00000205683 | DPF3     | 4 | 0.001232527 | 0.017830102 | 0    |
| 633 | ENSG00000050438 | SLC4A8   | 4 | 0.001232527 | 0.017830102 | 0.01 |
| 634 | ENSG00000093144 | ECHDC1   | 4 | 0.001232527 | 0.017830102 | 0.01 |
| 635 | ENSG00000102802 | MEDAG    | 4 | 0.001232527 | 0.017830102 | 0.01 |
| 636 | ENSG00000113575 | PPP2CA   | 4 | 0.001232527 | 0.017830102 | 0.01 |
| 637 | ENSG00000130119 | GNL3L    | 4 | 0.001232527 | 0.017830102 | 0.01 |
| 638 | ENSG00000134697 | GNL2     | 4 | 0.001232527 | 0.017830102 | 0.01 |
| 639 | ENSG00000136527 | TRA2B    | 4 | 0.001232527 | 0.017830102 | 0.01 |
| 640 | ENSG00000140263 | SORD     | 4 | 0.001232527 | 0.017830102 | 0.01 |
| 641 | ENSG00000147164 | SNX12    | 4 | 0.001232527 | 0.017830102 | 0.01 |
| 642 | ENSG00000156535 | CD109    | 4 | 0.001232527 | 0.017830102 | 0.01 |
| 643 | ENSG00000160818 | GPATCH4  | 4 | 0.001232527 | 0.017830102 | 0.01 |
| 644 | ENSG00000108854 | SMURF2   | 4 | 0.001232527 | 0.017830102 | 0.02 |
| 645 | ENSG00000120526 | NUDCD1   | 4 | 0.001232527 | 0.017830102 | 0.02 |
| 646 | ENSG00000132467 | UTP3     | 4 | 0.001232527 | 0.017830102 | 0.02 |
| 647 | ENSG00000151465 | CDC123   | 4 | 0.001232527 | 0.017830102 | 0.02 |
| 648 | ENSG00000100106 | TRIOBP   | 4 | 0.001232527 | 0.017830102 | 0.03 |
| 649 | ENSG00000109689 | STIM2    | 4 | 0.001232527 | 0.017830102 | 0.03 |
| 650 | ENSG00000164104 | HMGB2    | 4 | 0.001232527 | 0.017830102 | 0.03 |
| 651 | ENSG00000167977 | KCTD5    | 4 | 0.001232527 | 0.017830102 | 0.03 |
| 652 | ENSG00000189091 | SF3B3    | 4 | 0.001232527 | 0.017830102 | 0.03 |
| 653 | ENSG00000196793 | ZNF239   | 4 | 0.001232527 | 0.017830102 | 0.03 |
| 654 | ENSG00000072135 | PTPN18   | 4 | 0.001232527 | 0.017830102 | 0.04 |
| 655 | ENSG00000100558 | PLEK2    | 4 | 0.001232527 | 0.017830102 | 0.04 |

|     |                 |            |   |             |             |      |
|-----|-----------------|------------|---|-------------|-------------|------|
| 656 | ENSG00000174738 | NR1D2      | 4 | 0.001232527 | 0.017830102 | 0.04 |
| 657 | ENSG00000185760 | KCNQ5      | 4 | 0.001232527 | 0.017830102 | 0.04 |
| 658 | ENSG00000128340 | RAC2       | 4 | 0.001232527 | 0.017830102 | 0.05 |
| 659 | ENSG00000130066 | SAT1       | 4 | 0.001232527 | 0.017830102 | 0.05 |
| 660 | ENSG00000133030 | MPRIP      | 4 | 0.001232527 | 0.017830102 | 0.05 |
| 661 | ENSG00000133226 | SRRM1      | 4 | 0.001232527 | 0.017830102 | 0.05 |
| 662 | ENSG00000168237 | GLYTK      | 4 | 0.001232527 | 0.017830102 | 0.05 |
| 663 | ENSG00000170037 | CNTROB     | 4 | 0.001232527 | 0.017830102 | 0.05 |
| 664 | ENSG00000171492 | LRRC8D     | 4 | 0.001232527 | 0.017830102 | 0.05 |
| 665 | ENSG00000178295 | GEN1       | 4 | 0.001232527 | 0.017830102 | 0.05 |
| 666 | ENSG00000182973 | CNOT10     | 4 | 0.001232527 | 0.017830102 | 0.05 |
| 667 | ENSG00000100629 | CEP128     | 4 | 0.001232527 | 0.017830102 | 0.06 |
| 668 | ENSG00000101310 | SEC23B     | 4 | 0.001232527 | 0.017830102 | 0.06 |
| 669 | ENSG00000128059 | PPAT       | 4 | 0.001232527 | 0.017830102 | 0.07 |
| 670 | ENSG00000137825 | ITPKA      | 4 | 0.001232527 | 0.017830102 | 0.07 |
| 671 | ENSG00000180332 | KCTD4      | 4 | 0.001232527 | 0.017830102 | 0.07 |
| 672 | ENSG00000065427 | KARS       | 4 | 0.001232527 | 0.017830102 | 0.08 |
| 673 | ENSG00000160208 | RRP1B      | 4 | 0.001232527 | 0.017830102 | 0.08 |
| 674 | ENSG00000162825 | NBPF20     | 4 | 0.001232527 | 0.017830102 | 0.08 |
| 675 | ENSG00000180817 | PPA1       | 4 | 0.001232527 | 0.017830102 | 0.08 |
| 676 | ENSG00000206560 | ANKRD28    | 4 | 0.001232527 | 0.017830102 | 0.08 |
| 677 | ENSG00000003436 | TFPI       | 4 | 0.001232527 | 0.017830102 | 0.09 |
| 678 | ENSG00000117155 | SSX2IP     | 4 | 0.001232527 | 0.017830102 | 0.09 |
| 679 | ENSG00000093000 | NUP50      | 4 | 0.001232527 | 0.017830102 | 0.1  |
| 680 | ENSG00000102384 | CENPI      | 4 | 0.001232527 | 0.017830102 | 0.1  |
| 681 | ENSG00000102393 | GLA        | 4 | 0.001232527 | 0.017830102 | 0.1  |
| 682 | ENSG00000104332 | SFRP1      | 4 | 0.001232527 | 0.017830102 | 0.1  |
| 683 | ENSG00000038210 | PI4K2B     | 4 | 0.001232527 | 0.017830102 | 0.11 |
| 684 | ENSG00000102230 | PCYT1B     | 4 | 0.001232527 | 0.017830102 | 0.11 |
| 685 | ENSG00000111335 | OAS2       | 4 | 0.001232527 | 0.017830102 | 0.11 |
| 686 | ENSG00000167850 | CD300C     | 4 | 0.001232527 | 0.017830102 | 0.11 |
| 687 | ENSG00000102054 | RBBP7      | 4 | 0.001232527 | 0.017830102 | 0.12 |
| 688 | ENSG00000108064 | TFAM       | 4 | 0.001232527 | 0.017830102 | 0.12 |
| 689 | ENSG00000130830 | MPP1       | 4 | 0.001232527 | 0.017830102 | 0.12 |
| 690 | ENSG00000166477 | LEO1       | 4 | 0.001232527 | 0.017830102 | 0.12 |
| 691 | ENSG00000064199 | SPA17      | 4 | 0.001232527 | 0.017830102 | 0.13 |
| 692 | ENSG00000109321 | AREG       | 4 | 0.001232527 | 0.017830102 | 0.13 |
| 693 | ENSG00000124571 | XPO5       | 4 | 0.001232527 | 0.017830102 | 0.13 |
| 694 | ENSG00000144231 | POLR2D     | 4 | 0.001232527 | 0.017830102 | 0.13 |
| 695 | ENSG00000175806 | MSRA       | 4 | 0.001232527 | 0.017830102 | 0.13 |
| 696 | ENSG00000196584 | XRCC2      | 4 | 0.001232527 | 0.017830102 | 0.13 |
| 697 | ENSG00000068489 | PRR11      | 4 | 0.001232527 | 0.017830102 | 0.14 |
| 698 | ENSG00000128594 | LRRC4      | 4 | 0.001232527 | 0.017830102 | 0.14 |
| 699 | ENSG00000136450 | SRSF1      | 4 | 0.001232527 | 0.017830102 | 0.15 |
| 700 | ENSG00000158006 | PAFAH2     | 4 | 0.001232527 | 0.017830102 | 0.15 |
| 701 | ENSG00000170445 | HARS       | 4 | 0.001232527 | 0.017830102 | 0.15 |
| 702 | ENSG0000018699  | TTC27      | 4 | 0.001232527 | 0.017830102 | 0.16 |
| 703 | ENSG00000103489 | XYLT1      | 4 | 0.001232527 | 0.017830102 | 0.16 |
| 704 | ENSG00000131844 | MCC22      | 4 | 0.001232527 | 0.017830102 | 0.16 |
| 705 | ENSG00000205476 | CCDC85C    | 4 | 0.001232527 | 0.017830102 | 0.16 |
| 706 | ENSG00000062485 | CS         | 4 | 0.001232527 | 0.017830102 | 0.17 |
| 707 | ENSG00000065183 | WDR3       | 4 | 0.001232527 | 0.017830102 | 0.17 |
| 708 | ENSG00000146242 | TPBG       | 4 | 0.001232527 | 0.017830102 | 0.17 |
| 709 | ENSG00000172244 | C5orf34    | 4 | 0.001232527 | 0.017830102 | 0.17 |
| 710 | ENSG00000078304 | PPP2R5C    | 4 | 0.001232527 | 0.017830102 | 0.18 |
| 711 | ENSG00000132383 | RPA1       | 4 | 0.001232527 | 0.017830102 | 0.18 |
| 712 | ENSG00000151789 | ZNF385D    | 4 | 0.001232527 | 0.017830102 | 0.18 |
| 713 | ENSG00000156802 | ATAD2      | 4 | 0.001232527 | 0.017830102 | 0.18 |
| 714 | ENSG00000171566 | PLRG1      | 4 | 0.001232527 | 0.017830102 | 0.18 |
| 715 | ENSG00000091844 | RGS17      | 4 | 0.001232527 | 0.017830102 | 0.19 |
| 716 | ENSG00000105127 | AKAP8      | 4 | 0.001232527 | 0.017830102 | 0.19 |
| 717 | ENSG00000132313 | MRPL35     | 4 | 0.001232527 | 0.017830102 | 0.19 |
| 718 | ENSG00000168038 | ULK4       | 4 | 0.001232527 | 0.017830102 | 0.19 |
| 719 | ENSG00000181938 | GINS3      | 4 | 0.001232527 | 0.017830102 | 0.19 |
| 720 | ENSG00000184205 | TSPYL2     | 4 | 0.001232527 | 0.017830102 | 0.19 |
| 721 | ENSG00000187325 | TAF9B      | 4 | 0.001232527 | 0.017830102 | 0.19 |
| 722 | ENSG00000197275 | RAD54B     | 4 | 0.001232527 | 0.017830102 | 0.19 |
| 723 | ENSG00000071626 | DAZAP1     | 4 | 0.001232527 | 0.017830102 | 0.2  |
| 724 | ENSG00000111605 | CPSF6      | 4 | 0.001232527 | 0.017830102 | 0.2  |
| 725 | ENSG00000136891 | TEX10      | 4 | 0.001232527 | 0.017830102 | 0.2  |
| 726 | ENSG00000164654 | MIOS       | 4 | 0.001232527 | 0.017830102 | 0.2  |
| 727 | ENSG00000176401 | EID2B      | 4 | 0.001232527 | 0.017830102 | 0.2  |
| 728 | ENSG00000183955 | KMT5A      | 4 | 0.001232527 | 0.017830102 | 0.2  |
| 729 | ENSG00000242265 | PEG10      | 4 | 0.001232527 | 0.017830102 | 0.2  |
| 730 | ENSG00000103591 | AAGAB      | 4 | 0.001232527 | 0.017830102 | 0.21 |
| 731 | ENSG00000146733 | PSPH       | 4 | 0.001232527 | 0.017830102 | 0.21 |
| 732 | ENSG00000165506 | DNAAF2     | 4 | 0.001232527 | 0.017830102 | 0.21 |
| 733 | ENSG00000177889 | UBE2N      | 4 | 0.001232527 | 0.017830102 | 0.21 |
| 734 | ENSG00000055483 | USP36      | 4 | 0.001232527 | 0.017830102 | 0.22 |
| 735 | ENSG00000119685 | TTL5       | 4 | 0.001232527 | 0.017830102 | 0.22 |
| 736 | ENSG00000140526 | ABHD2      | 4 | 0.001232527 | 0.017830102 | 0.22 |
| 737 | ENSG00000170545 | SMAGP      | 4 | 0.001232527 | 0.017830102 | 0.22 |
| 738 | ENSG00000224578 | HNRNPA1P48 | 4 | 0.001232527 | 0.017830102 | 0.22 |
| 739 | ENSG00000078140 | UBE2K      | 4 | 0.001232527 | 0.017830102 | 0.23 |
| 740 | ENSG00000126216 | TUBGCP3    | 4 | 0.001232527 | 0.017830102 | 0.23 |
| 741 | ENSG00000101000 | PROCR      | 4 | 0.001232527 | 0.017830102 | 0.24 |
| 742 | ENSG00000136261 | BZW2       | 4 | 0.001232527 | 0.017830102 | 0.24 |
| 743 | ENSG00000151287 | TEX30      | 4 | 0.001232527 | 0.017830102 | 0.24 |
| 744 | ENSG00000023572 | GLRX2      | 4 | 0.001232527 | 0.017830102 | 0.25 |
| 745 | ENSG00000095203 | EPB41L4B   | 4 | 0.001232527 | 0.017830102 | 0.25 |
| 746 | ENSG00000112576 | CCND3      | 4 | 0.001232527 | 0.017830102 | 0.25 |
| 747 | ENSG00000116489 | CAPZA1     | 4 | 0.001232527 | 0.017830102 | 0.25 |
| 748 | ENSG00000119487 | MAPKAP1    | 4 | 0.001232527 | 0.017830102 | 0.25 |
| 749 | ENSG00000124596 | OARD1      | 4 | 0.001232527 | 0.017830102 | 0.25 |



|     |                 |            |   |             |             |      |
|-----|-----------------|------------|---|-------------|-------------|------|
| 750 | ENSG00000166979 | EVA1C      | 4 | 0.001232527 | 0.017830102 | 0.25 |
| 751 | ENSG00000204767 | INSYN2B    | 4 | 0.001232527 | 0.017830102 | 0.25 |
| 752 | ENSG00000119865 | CNRIP1     | 4 | 0.001232527 | 0.017830102 | 0.26 |
| 753 | ENSG00000124193 | SRSF6      | 4 | 0.001232527 | 0.017830102 | 0.26 |
| 754 | ENSG00000124541 | RRP36      | 4 | 0.001232527 | 0.017830102 | 0.26 |
| 755 | ENSG00000157064 | NMNAT2     | 4 | 0.001232527 | 0.017830102 | 0.26 |
| 756 | ENSG00000171320 | ESCO2      | 4 | 0.001232527 | 0.017830102 | 0.26 |
| 757 | ENSG00000023171 | GRAMD1B    | 4 | 0.001232527 | 0.017830102 | 0.27 |
| 758 | ENSG00000026559 | KCNG1      | 4 | 0.001232527 | 0.017830102 | 0.27 |
| 759 | ENSG00000088247 | KHSRP      | 4 | 0.001232527 | 0.017830102 | 0.27 |
| 760 | ENSG00000106603 | COA1       | 4 | 0.001232527 | 0.017830102 | 0.27 |
| 761 | ENSG00000108561 | C1QBP      | 4 | 0.001232527 | 0.017830102 | 0.27 |
| 762 | ENSG00000133706 | LARS       | 4 | 0.001232527 | 0.017830102 | 0.27 |
| 763 | ENSG00000143867 | OSR1       | 4 | 0.001232527 | 0.017830102 | 0.27 |
| 764 | ENSG00000147459 | DOCK5      | 4 | 0.001232527 | 0.017830102 | 0.27 |
| 765 | ENSG00000155561 | NUP205     | 4 | 0.001232527 | 0.017830102 | 0.27 |
| 766 | ENSG00000101158 | NELFCD     | 4 | 0.001232527 | 0.017830102 | 0.28 |
| 767 | ENSG00000107815 | TWNK       | 4 | 0.001232527 | 0.017830102 | 0.28 |
| 768 | ENSG00000112029 | FBXO5      | 4 | 0.001232527 | 0.017830102 | 0.28 |
| 769 | ENSG00000137547 | MRPL15     | 4 | 0.001232527 | 0.017830102 | 0.28 |
| 770 | ENSG00000139746 | RBM26      | 4 | 0.001232527 | 0.017830102 | 0.28 |
| 771 | ENSG00000148677 | ANKRD1     | 4 | 0.001232527 | 0.017830102 | 0.28 |
| 772 | ENSG00000148841 | ITPRIP     | 4 | 0.001232527 | 0.017830102 | 0.28 |
| 773 | ENSG00000158156 | XKR8       | 4 | 0.001232527 | 0.017830102 | 0.28 |
| 774 | ENSG00000169895 | SYAP1      | 4 | 0.001232527 | 0.017830102 | 0.28 |
| 775 | ENSG00000014138 | POLA2      | 4 | 0.001232527 | 0.017830102 | 0.29 |
| 776 | ENSG00000155438 | NIFK       | 4 | 0.001232527 | 0.017830102 | 0.29 |
| 777 | ENSG00000196954 | CASP4      | 4 | 0.001232527 | 0.017830102 | 0.29 |
| 778 | ENSG00000204856 | FAM216A    | 4 | 0.001232527 | 0.017830102 | 0.29 |
| 779 | ENSG00000085662 | AKR1B1     | 4 | 0.001232527 | 0.017830102 | 0.3  |
| 780 | ENSG00000125863 | MKKS       | 4 | 0.001232527 | 0.017830102 | 0.3  |
| 781 | ENSG00000134480 | CCNH       | 4 | 0.001232527 | 0.017830102 | 0.3  |
| 782 | ENSG00000141367 | CLTC       | 4 | 0.001232527 | 0.017830102 | 0.3  |
| 783 | ENSG00000146678 | IGFBP1     | 4 | 0.001232527 | 0.017830102 | 0.3  |
| 784 | ENSG00000100714 | MTHFD1     | 4 | 0.001232527 | 0.017830102 | 0.31 |
| 785 | ENSG00000136840 | ST6GALNAC4 | 4 | 0.001232527 | 0.017830102 | 0.31 |
| 786 | ENSG00000139645 | ANKRD52    | 4 | 0.001232527 | 0.017830102 | 0.31 |
| 787 | ENSG00000151247 | EIF4E      | 4 | 0.001232527 | 0.017830102 | 0.31 |
| 788 | ENSG00000164898 | FMC1       | 4 | 0.001232527 | 0.017830102 | 0.31 |
| 789 | ENSG00000035499 | DEPDC1B    | 4 | 0.001232527 | 0.017830102 | 0.32 |
| 790 | ENSG00000112578 | BYSL       | 4 | 0.001232527 | 0.017830102 | 0.32 |
| 791 | ENSG00000125630 | POLR1B     | 4 | 0.001232527 | 0.017830102 | 0.32 |
| 792 | ENSG00000125827 | TMX4       | 4 | 0.001232527 | 0.017830102 | 0.32 |
| 793 | ENSG00000130429 | ARPC1B     | 4 | 0.001232527 | 0.017830102 | 0.32 |
| 794 | ENSG00000140961 | OSGIN1     | 4 | 0.001232527 | 0.017830102 | 0.32 |
| 795 | ENSG00000080608 | PUM3       | 4 | 0.001232527 | 0.017830102 | 0.33 |
| 796 | ENSG00000109674 | NEIL3      | 4 | 0.001232527 | 0.017830102 | 0.33 |
| 797 | ENSG00000120053 | GOT1       | 4 | 0.001232527 | 0.017830102 | 0.33 |
| 798 | ENSG00000151665 | PIGF       | 4 | 0.001232527 | 0.017830102 | 0.33 |
| 799 | ENSG00000171497 | PPID       | 4 | 0.001232527 | 0.017830102 | 0.33 |
| 800 | ENSG00000174842 | GLMN       | 4 | 0.001232527 | 0.017830102 | 0.33 |
| 801 | ENSG00000197961 | ZNF121     | 4 | 0.001232527 | 0.017830102 | 0.33 |
| 802 | ENSG00000005022 | SLC25A5    | 4 | 0.001232527 | 0.017830102 | 0.34 |
| 803 | ENSG00000070831 | CDC42      | 4 | 0.001232527 | 0.017830102 | 0.34 |
| 804 | ENSG00000101670 | LIPG       | 4 | 0.001232527 | 0.017830102 | 0.34 |
| 805 | ENSG00000182667 | NTM        | 4 | 0.001232527 | 0.017830102 | 0.34 |
| 806 | ENSG00000072501 | SMC1A      | 4 | 0.001232527 | 0.017830102 | 0.35 |
| 807 | ENSG00000080839 | RBL1       | 4 | 0.001232527 | 0.017830102 | 0.35 |
| 808 | ENSG00000103876 | FAH        | 4 | 0.001232527 | 0.017830102 | 0.35 |
| 809 | ENSG00000104687 | GSR        | 4 | 0.001232527 | 0.017830102 | 0.35 |
| 810 | ENSG00000151617 | EDNRA      | 4 | 0.001232527 | 0.017830102 | 0.35 |
| 811 | ENSG00000156017 | CARNMT1    | 4 | 0.001232527 | 0.017830102 | 0.35 |
| 812 | ENSG00000157227 | MMP14      | 4 | 0.001232527 | 0.017830102 | 0.35 |
| 813 | ENSG00000176871 | WSB2       | 4 | 0.001232527 | 0.017830102 | 0.35 |
| 814 | ENSG00000181467 | RAP2B      | 4 | 0.001232527 | 0.017830102 | 0.35 |
| 815 | ENSG00000204516 | MICB       | 4 | 0.001232527 | 0.017830102 | 0.35 |
| 816 | ENSG00000214367 | HAUS3      | 4 | 0.001232527 | 0.017830102 | 0.35 |
| 817 | ENSG00000064607 | SUGP2      | 4 | 0.001232527 | 0.017830102 | 0.36 |
| 818 | ENSG00000179041 | RRS1       | 4 | 0.001232527 | 0.017830102 | 0.36 |
| 819 | ENSG00000182963 | GJC1       | 4 | 0.001232527 | 0.017830102 | 0.36 |
| 820 | ENSG00000005189 | REXO5      | 4 | 0.001232527 | 0.017830102 | 0.37 |
| 821 | ENSG00000035681 | NSMAF      | 4 | 0.001232527 | 0.017830102 | 0.37 |
| 822 | ENSG00000102699 | PARP4      | 4 | 0.001232527 | 0.017830102 | 0.37 |
| 823 | ENSG00000106554 | CHCHD3     | 4 | 0.001232527 | 0.017830102 | 0.37 |
| 824 | ENSG00000138347 | MYPN       | 4 | 0.001232527 | 0.017830102 | 0.37 |
| 825 | ENSG00000168487 | BMP1       | 4 | 0.001232527 | 0.017830102 | 0.37 |
| 826 | ENSG00000169213 | RAB3B      | 4 | 0.001232527 | 0.017830102 | 0.37 |
| 827 | ENSG00000170917 | NUDT6      | 4 | 0.001232527 | 0.017830102 | 0.37 |
| 828 | ENSG00000180044 | C3orf80    | 4 | 0.001232527 | 0.017830102 | 0.37 |
| 829 | ENSG00000213066 | FGFR10P    | 4 | 0.001232527 | 0.017830102 | 0.37 |
| 830 | ENSG00000122483 | CCDC18     | 4 | 0.001232527 | 0.017830102 | 0.38 |
| 831 | ENSG00000135363 | LMO2       | 4 | 0.001232527 | 0.017830102 | 0.38 |
| 832 | ENSG00000146376 | ARHGAP18   | 4 | 0.001232527 | 0.017830102 | 0.38 |
| 833 | ENSG00000154589 | LY96       | 4 | 0.001232527 | 0.017830102 | 0.38 |
| 834 | ENSG00000174780 | SRP72      | 4 | 0.001232527 | 0.017830102 | 0.38 |
| 835 | ENSG00000113356 | POLR3G     | 4 | 0.001232527 | 0.017830102 | 0.39 |
| 836 | ENSG00000271503 | CCL5       | 4 | 0.001232527 | 0.017830102 | 0.39 |
| 837 | ENSG00000116711 | PLA2G4A    | 4 | 0.001232527 | 0.017830102 | 0.4  |
| 838 | ENSG00000161057 | PSMC2      | 4 | 0.001232527 | 0.017830102 | 0.4  |
| 839 | ENSG00000182903 | ZNF721     | 4 | 0.001232527 | 0.017830102 | 0.4  |
| 840 | ENSG00000184110 | EIF3C      | 4 | 0.001232527 | 0.017830102 | 0.4  |
| 841 | ENSG00000198554 | WDHD1      | 4 | 0.001232527 | 0.017830102 | 0.4  |
| 842 | ENSG00000117308 | GALE       | 4 | 0.001232527 | 0.017830102 | 0.41 |
| 843 | ENSG00000130816 | DNMT1      | 4 | 0.001232527 | 0.017830102 | 0.41 |

|     |                 |          |   |             |             |      |
|-----|-----------------|----------|---|-------------|-------------|------|
| 844 | ENSG00000141682 | PMAIP1   | 4 | 0.001232527 | 0.017830102 | 0.41 |
| 845 | ENSG00000148459 | PDSS1    | 4 | 0.001232527 | 0.017830102 | 0.41 |
| 846 | ENSG00000163808 | KIF15    | 4 | 0.001232527 | 0.017830102 | 0.41 |
| 847 | ENSG00000165487 | MICU2    | 4 | 0.001232527 | 0.017830102 | 0.41 |
| 848 | ENSG00000263465 | SRSF8    | 4 | 0.001232527 | 0.017830102 | 0.41 |
| 849 | ENSG00000101574 | METTL4   | 4 | 0.001232527 | 0.017830102 | 0.42 |
| 850 | ENSG00000103423 | DNAJA3   | 4 | 0.001232527 | 0.017830102 | 0.42 |
| 851 | ENSG00000123374 | CDK2     | 4 | 0.001232527 | 0.017830102 | 0.42 |
| 852 | ENSG00000130935 | NOL11    | 4 | 0.001232527 | 0.017830102 | 0.42 |
| 853 | ENSG00000132305 | IMMT     | 4 | 0.001232527 | 0.017830102 | 0.42 |
| 854 | ENSG00000138346 | DNA2     | 4 | 0.001232527 | 0.017830102 | 0.42 |
| 855 | ENSG00000185347 | TEDC1    | 4 | 0.001232527 | 0.017830102 | 0.42 |
| 856 | ENSG00000101096 | NFATC2   | 4 | 0.001232527 | 0.017830102 | 0.43 |
| 857 | ENSG00000105926 | MPP6     | 4 | 0.001232527 | 0.017830102 | 0.43 |
| 858 | ENSG00000107566 | ERLIN1   | 4 | 0.001232527 | 0.017830102 | 0.43 |
| 859 | ENSG00000151466 | SCLT1    | 4 | 0.001232527 | 0.017830102 | 0.43 |
| 860 | ENSG00000158270 | COLEC12  | 4 | 0.001232527 | 0.017830102 | 0.43 |
| 861 | ENSG00000162302 | RPS6KA4  | 4 | 0.001232527 | 0.017830102 | 0.43 |
| 862 | ENSG00000115816 | CEBPZ    | 4 | 0.001232527 | 0.017830102 | 0.44 |
| 863 | ENSG00000124802 | EEF1E1   | 4 | 0.001232527 | 0.017830102 | 0.44 |
| 864 | ENSG00000132361 | CLUH     | 4 | 0.001232527 | 0.017830102 | 0.44 |
| 865 | ENSG00000141560 | FN3KRP   | 4 | 0.001232527 | 0.017830102 | 0.44 |
| 866 | ENSG00000149636 | DSN1     | 4 | 0.001232527 | 0.017830102 | 0.44 |
| 867 | ENSG00000159202 | UBE2Z    | 4 | 0.001232527 | 0.017830102 | 0.44 |
| 868 | ENSG00000006606 | CCL26    | 4 | 0.001232527 | 0.017830102 | 0.45 |
| 869 | ENSG00000095002 | MSH2     | 4 | 0.001232527 | 0.017830102 | 0.45 |
| 870 | ENSG00000105063 | PPP6R1   | 4 | 0.001232527 | 0.017830102 | 0.45 |
| 871 | ENSG00000114270 | COL7A1   | 4 | 0.001232527 | 0.017830102 | 0.45 |
| 872 | ENSG00000126368 | NR1D1    | 4 | 0.001232527 | 0.017830102 | 0.45 |
| 873 | ENSG00000141385 | AFG3L2   | 4 | 0.001232527 | 0.017830102 | 0.45 |
| 874 | ENSG00000157870 | PRXL2B   | 4 | 0.001232527 | 0.017830102 | 0.45 |
| 875 | ENSG00000162062 | TEDC2    | 4 | 0.001232527 | 0.017830102 | 0.45 |
| 876 | ENSG00000164161 | HHIP     | 4 | 0.001232527 | 0.017830102 | 0.45 |
| 877 | ENSG00000048162 | NOP16    | 4 | 0.001232527 | 0.017830102 | 0.46 |
| 878 | ENSG00000119661 | DNAL1    | 4 | 0.001232527 | 0.017830102 | 0.46 |
| 879 | ENSG00000126215 | XRCC3    | 4 | 0.001232527 | 0.017830102 | 0.46 |
| 880 | ENSG00000187741 | FANCA    | 4 | 0.001232527 | 0.017830102 | 0.46 |
| 881 | ENSG00000029153 | ARNTL2   | 4 | 0.001232527 | 0.017830102 | 0.47 |
| 882 | ENSG00000125965 | GDF5     | 4 | 0.001232527 | 0.017830102 | 0.47 |
| 883 | ENSG00000129596 | CDO1     | 4 | 0.001232527 | 0.017830102 | 0.47 |
| 884 | ENSG00000130520 | n_a      | 4 | 0.001232527 | 0.017830102 | 0.47 |
| 885 | ENSG00000175040 | CHST2    | 4 | 0.001232527 | 0.017830102 | 0.47 |
| 886 | ENSG00000258366 | RTEL1    | 4 | 0.001232527 | 0.017830102 | 0.47 |
| 887 | ENSG00000097046 | CDC7     | 4 | 0.001232527 | 0.017830102 | 0.48 |
| 888 | ENSG00000100528 | CNIH1    | 4 | 0.001232527 | 0.017830102 | 0.48 |
| 889 | ENSG00000128708 | HAT1     | 4 | 0.001232527 | 0.017830102 | 0.48 |
| 890 | ENSG00000164134 | NAA15    | 4 | 0.001232527 | 0.017830102 | 0.48 |
| 891 | ENSG00000181649 | PHLDA2   | 4 | 0.001232527 | 0.017830102 | 0.48 |
| 892 | ENSG00000185112 | FAM43A   | 4 | 0.001232527 | 0.017830102 | 0.48 |
| 893 | ENSG00000186575 | NF2      | 4 | 0.001232527 | 0.017830102 | 0.48 |
| 894 | ENSG00000213190 | MLLT11   | 4 | 0.001232527 | 0.017830102 | 0.48 |
| 895 | ENSG00000232119 | MCTS1    | 4 | 0.001232527 | 0.017830102 | 0.48 |
| 896 | ENSG00000085760 | MTIF2    | 4 | 0.001232527 | 0.017830102 | 0.49 |
| 897 | ENSG00000111445 | RFC5     | 4 | 0.001232527 | 0.017830102 | 0.49 |
| 898 | ENSG00000139291 | TMEM19   | 4 | 0.001232527 | 0.017830102 | 0.49 |
| 899 | ENSG00000174611 | KY       | 4 | 0.001232527 | 0.017830102 | 0.49 |
| 900 | ENSG00000260456 | C16orf95 | 4 | 0.001232527 | 0.017830102 | 0.49 |
| 901 | ENSG00000119689 | DLST     | 4 | 0.001232527 | 0.017830102 | 0.5  |
| 902 | ENSG00000135111 | TBX3     | 4 | 0.001232527 | 0.017830102 | 0.5  |
| 903 | ENSG00000137055 | PLAA     | 4 | 0.001232527 | 0.017830102 | 0.5  |
| 904 | ENSG00000147224 | PRPS1    | 4 | 0.001232527 | 0.017830102 | 0.5  |
| 905 | ENSG00000161692 | DBF4B    | 4 | 0.001232527 | 0.017830102 | 0.5  |
| 906 | ENSG00000183840 | GPR39    | 4 | 0.001232527 | 0.017830102 | 0.5  |
| 907 | ENSG00000196581 | AJAP1    | 4 | 0.001232527 | 0.017830102 | 0.5  |
| 908 | ENSG00000163297 | ANTXR2   | 4 | 0.001232527 | 0.017830102 | 0.51 |
| 909 | ENSG00000171951 | SCG2     | 4 | 0.001232527 | 0.017830102 | 0.51 |
| 910 | ENSG00000125148 | MT2A     | 4 | 0.001232527 | 0.017830102 | 0.52 |
| 911 | ENSG00000001036 | FUCA2    | 4 | 0.001232527 | 0.017830102 | 0.53 |
| 912 | ENSG00000006634 | DBF4     | 4 | 0.001232527 | 0.017830102 | 0.53 |
| 913 | ENSG00000090372 | STRN4    | 4 | 0.001232527 | 0.017830102 | 0.53 |
| 914 | ENSG00000091409 | ITGA6    | 4 | 0.001232527 | 0.017830102 | 0.53 |
| 915 | ENSG00000134884 | ARGLU1   | 4 | 0.001232527 | 0.017830102 | 0.53 |
| 916 | ENSG00000197321 | SVIL     | 4 | 0.001232527 | 0.017830102 | 0.53 |
| 917 | ENSG00000132646 | PCNA     | 4 | 0.001232527 | 0.017830102 | 0.54 |
| 918 | ENSG00000127423 | AUNIP    | 4 | 0.001232527 | 0.017830102 | 0.55 |
| 919 | ENSG00000163399 | ATP1A1   | 4 | 0.001232527 | 0.017830102 | 0.55 |
| 920 | ENSG00000101224 | CDC25B   | 4 | 0.001232527 | 0.017830102 | 0.56 |
| 921 | ENSG00000107798 | LIPA     | 4 | 0.001232527 | 0.017830102 | 0.56 |
| 922 | ENSG00000156103 | MMP16    | 4 | 0.001232527 | 0.017830102 | 0.56 |
| 923 | ENSG00000211445 | GPX3     | 4 | 0.001232527 | 0.017830102 | 0.56 |
| 924 | ENSG00000111331 | OAS3     | 4 | 0.001232527 | 0.017830102 | 0.57 |
| 925 | ENSG00000168785 | TSPAN5   | 4 | 0.001232527 | 0.017830102 | 0.57 |
| 926 | ENSG00000139344 | AMDHD1   | 4 | 0.001232527 | 0.017830102 | 0.58 |
| 927 | ENSG00000110876 | SELPLG   | 4 | 0.001232527 | 0.017830102 | 0.59 |
| 928 | ENSG00000221829 | FANCG    | 4 | 0.001232527 | 0.017830102 | 0.59 |
| 929 | ENSG00000119787 | ATL2     | 4 | 0.001232527 | 0.017830102 | 0.6  |
| 930 | ENSG00000198015 | MRPL42   | 4 | 0.001232527 | 0.017830102 | 0.6  |
| 931 | ENSG00000156298 | TSPAN7   | 4 | 0.001232527 | 0.017830102 | 0.61 |
| 932 | ENSG00000183287 | CCBE1    | 4 | 0.001232527 | 0.017830102 | 0.61 |
| 933 | ENSG00000135521 | LTV1     | 4 | 0.001232527 | 0.017830102 | 0.62 |
| 934 | ENSG00000066926 | FECH     | 4 | 0.001232527 | 0.017830102 | 0.63 |
| 935 | ENSG00000120647 | CCDC77   | 4 | 0.001232527 | 0.017830102 | 0.63 |
| 936 | ENSG00000134070 | IRAK2    | 4 | 0.001232527 | 0.017830102 | 0.63 |
| 937 | ENSG00000144395 | CCDC150  | 4 | 0.001232527 | 0.017830102 | 0.64 |

|      |                 |            |   |             |             |       |
|------|-----------------|------------|---|-------------|-------------|-------|
| 938  | ENSG00000130695 | CEP85      | 4 | 0.001232527 | 0.017830102 | 0.65  |
| 939  | ENSG00000133313 | CNDP2      | 4 | 0.001232527 | 0.017830102 | 0.65  |
| 940  | ENSG00000186469 | GNG2       | 4 | 0.001232527 | 0.017830102 | 0.66  |
| 941  | ENSG00000007968 | E2F2       | 4 | 0.001232527 | 0.017830102 | 0.67  |
| 942  | ENSG00000185900 | POMK       | 4 | 0.001232527 | 0.017830102 | 0.67  |
| 943  | ENSG00000166508 | MCM7       | 4 | 0.001232527 | 0.017830102 | 0.68  |
| 944  | ENSG00000128342 | LIF        | 4 | 0.001232527 | 0.017830102 | 0.7   |
| 945  | ENSG00000131153 | GINS2      | 4 | 0.001232527 | 0.017830102 | 0.71  |
| 946  | ENSG00000079313 | REXO1      | 4 | 0.001232527 | 0.017830102 | 0.73  |
| 947  | ENSG00000168883 | USP39      | 4 | 0.001232527 | 0.017830102 | 0.73  |
| 948  | ENSG00000188917 | TRMT2B     | 4 | 0.001232527 | 0.017830102 | 0.73  |
| 949  | ENSG00000255508 | n_a        | 4 | 0.001232527 | 0.017830102 | 0.73  |
| 950  | ENSG00000011485 | PPP5C      | 4 | 0.001232527 | 0.017830102 | 0.74  |
| 951  | ENSG00000065802 | ASB1       | 4 | 0.001232527 | 0.017830102 | 0.74  |
| 952  | ENSG00000165271 | NOL6       | 4 | 0.001232527 | 0.017830102 | 0.74  |
| 953  | ENSG00000258484 | SPESP1     | 4 | 0.001232527 | 0.017830102 | 0.74  |
| 954  | ENSG00000012963 | UBR7       | 4 | 0.001232527 | 0.017830102 | 0.75  |
| 955  | ENSG00000182584 | ACTL10     | 4 | 0.001232527 | 0.017830102 | 0.75  |
| 956  | ENSG00000171302 | CANT1      | 4 | 0.001232527 | 0.017830102 | 0.76  |
| 957  | ENSG00000085999 | RAD54L     | 4 | 0.001232527 | 0.017830102 | 0.77  |
| 958  | ENSG00000092445 | TYRO3      | 4 | 0.001232527 | 0.017830102 | 0.79  |
| 959  | ENSG00000139514 | SLC7A1     | 4 | 0.001232527 | 0.017830102 | 0.8   |
| 960  | ENSG00000143942 | CHAC2      | 4 | 0.001232527 | 0.017830102 | 0.8   |
| 961  | ENSG00000089127 | OAS1       | 4 | 0.001232527 | 0.017830102 | 0.81  |
| 962  | ENSG00000171793 | CTPS1      | 4 | 0.001232527 | 0.017830102 | 0.82  |
| 963  | ENSG00000178999 | AURKB      | 4 | 0.001232527 | 0.017830102 | 0.82  |
| 964  | ENSG00000143512 | HHIPL2     | 4 | 0.001232527 | 0.017830102 | 0.83  |
| 965  | ENSG00000188581 | KRTAP1-1   | 4 | 0.001232527 | 0.017830102 | 0.83  |
| 966  | ENSG00000011007 | ELOA       | 4 | 0.001232527 | 0.017830102 | 0.84  |
| 967  | ENSG00000097021 | ACOT7      | 4 | 0.001232527 | 0.017830102 | 0.85  |
| 968  | ENSG00000080493 | SLC4A4     | 4 | 0.001232527 | 0.017830102 | 0.86  |
| 969  | ENSG00000105968 | H2AFV      | 4 | 0.001232527 | 0.017830102 | 0.86  |
| 970  | ENSG00000134569 | LRP4       | 4 | 0.001232527 | 0.017830102 | 0.86  |
| 971  | ENSG00000144635 | DYNC11L1   | 4 | 0.001232527 | 0.017830102 | 0.86  |
| 972  | ENSG00000156709 | AIFM1      | 4 | 0.001232527 | 0.017830102 | 0.86  |
| 973  | ENSG00000080986 | NDC80      | 4 | 0.001232527 | 0.017830102 | 0.87  |
| 974  | ENSG00000135324 | MRAP2      | 4 | 0.001232527 | 0.017830102 | 0.89  |
| 975  | ENSG00000116741 | RGS2       | 4 | 0.001232527 | 0.017830102 | 0.92  |
| 976  | ENSG00000115919 | KYNU       | 4 | 0.001232527 | 0.017830102 | 0.96  |
| 977  | ENSG00000164163 | ABCE1      | 4 | 0.001232527 | 0.017830102 | 0.96  |
| 978  | ENSG00000075131 | TIPIN      | 4 | 0.001232527 | 0.017830102 | 0.98  |
| 979  | ENSG00000126088 | UROD       | 4 | 0.001232527 | 0.017830102 | 0.98  |
| 980  | ENSG00000255112 | CHMP1B     | 4 | 0.001232527 | 0.017830102 | 0.99  |
| 981  | ENSG00000108788 | MLX        | 4 | 0.001232527 | 0.017830102 | 1     |
| 982  | ENSG00000163002 | NUP35      | 4 | 0.001232527 | 0.017830102 | 1.01  |
| 983  | ENSG00000101407 | TTI1       | 4 | 0.001232527 | 0.017830102 | 1.03  |
| 984  | ENSG00000127564 | PKMYT1     | 4 | 0.001232527 | 0.017830102 | 1.03  |
| 985  | ENSG00000118503 | TNFAIP3    | 4 | 0.001232527 | 0.017830102 | 1.04  |
| 986  | ENSG00000160949 | TONSL      | 4 | 0.001232527 | 0.017830102 | 1.05  |
| 987  | ENSG00000005302 | MSL3       | 4 | 0.001232527 | 0.017830102 | 1.07  |
| 988  | ENSG00000125375 | DMAC2L     | 4 | 0.001232527 | 0.017830102 | 1.1   |
| 989  | ENSG00000103187 | COTL1      | 4 | 0.001232527 | 0.017830102 | 1.13  |
| 990  | ENSG00000131019 | ULBP3      | 4 | 0.001232527 | 0.017830102 | 1.13  |
| 991  | ENSG00000148840 | PPRC1      | 4 | 0.001232527 | 0.017830102 | 1.17  |
| 992  | ENSG00000069431 | ABCC9      | 4 | 0.001232527 | 0.017830102 | 1.19  |
| 993  | ENSG00000163931 | TKT        | 4 | 0.001232527 | 0.017830102 | 1.19  |
| 994  | ENSG00000136158 | SPRY2      | 4 | 0.001232527 | 0.017830102 | 1.21  |
| 995  | ENSG00000171357 | LURAP1     | 4 | 0.001232527 | 0.017830102 | 1.25  |
| 996  | ENSG00000183421 | RIPK4      | 4 | 0.001232527 | 0.017830102 | 1.25  |
| 997  | ENSG00000119335 | SET        | 4 | 0.001232527 | 0.017830102 | 1.27  |
| 998  | ENSG00000048342 | CC2D2A     | 4 | 0.001232527 | 0.017830102 | 1.29  |
| 999  | ENSG00000155363 | MOV10      | 4 | 0.001232527 | 0.017830102 | 1.29  |
| 1000 | ENSG00000077152 | UBE2T      | 4 | 0.001232527 | 0.017830102 | 1.32  |
| 1001 | ENSG00000106397 | PLOD3      | 4 | 0.001232527 | 0.017830102 | 1.37  |
| 1002 | ENSG00000111581 | NUP107     | 4 | 0.001232527 | 0.017830102 | 1.44  |
| 1003 | ENSG00000198130 | HIBCH      | 4 | 0.001232527 | 0.017830102 | 1.47  |
| 1004 | ENSG00000183891 | TTC32      | 4 | 0.001232527 | 0.017830102 | 1.51  |
| 1005 | ENSG00000002745 | WNT16      | 4 | 0.001232527 | 0.017830102 | 1.56  |
| 1006 | ENSG00000108424 | KPNB1      | 4 | 0.001232527 | 0.017830102 | 1.58  |
| 1007 | ENSG00000156345 | CDK20      | 4 | 0.001232527 | 0.017830102 | 1.58  |
| 1008 | ENSG00000114757 | PEX5L      | 4 | 0.001232527 | 0.017830102 | 1.6   |
| 1009 | ENSG00000100983 | GSS        | 4 | 0.001232527 | 0.017830102 | 1.75  |
| 1010 | ENSG00000214595 | EML6       | 4 | 0.001232527 | 0.017830102 | 1.76  |
| 1011 | ENSG00000115310 | RTN4       | 4 | 0.001232527 | 0.017830102 | 1.93  |
| 1012 | ENSG00000156136 | DCK        | 4 | 0.001232527 | 0.017830102 | 1.95  |
| 1013 | ENSG00000154277 | UCHL1      | 4 | 0.001232527 | 0.017830102 | 2.26  |
| 1014 | ENSG00000172590 | MRPL52     | 4 | 0.001232527 | 0.017830102 | 2.27  |
| 1015 | ENSG00000183048 | SLC25A10   | 4 | 0.001232527 | 0.017830102 | 2.29  |
| 1016 | ENSG00000147408 | CSGALNACT1 | 4 | 0.001232527 | 0.017830102 | 2.43  |
| 1017 | ENSG00000177917 | ARL6IP6    | 4 | 0.001232527 | 0.017830102 | 2.85  |
| 1018 | ENSG00000163781 | TOPBP1     | 4 | 0.001232527 | 0.017830102 | 2.89  |
| 1019 | ENSG00000110721 | CHKA       | 4 | 0.001232527 | 0.017830102 | 2.96  |
| 1020 | ENSG00000124882 | EREG       | 4 | 0.001232527 | 0.017830102 | 3.7   |
| 1021 | ENSG00000108932 | SLC16A6    | 4 | 0.001232527 | 0.017830102 | 4.4   |
| 1022 | ENSG00000172296 | SPTLC3     | 4 | 0.001232527 | 0.017830102 | 4.65  |
| 1023 | ENSG00000116690 | PRG4       | 4 | 0.001232527 | 0.017830102 | 4.77  |
| 1024 | ENSG00000132541 | RIDA       | 4 | 0.001232527 | 0.017830102 | 5.23  |
| 1025 | ENSG00000119917 | IFIT3      | 4 | 0.001232527 | 0.017830102 | 5.82  |
| 1026 | ENSG00000169429 | CXCL8      | 4 | 0.001232527 | 0.017830102 | 24.95 |
