# Supplementary material for: Decoding the differentiation of mesenchymal stem cells into mesangial cells at the transcriptomic level
Source: PubMed Central journal article supplement (PMC7339572; doi:10.1186/s12864-020-06868-5), 2020-07-07
Supplement: 12864_2020_6868_MOESM4_ESM.pdf [file 12864_2020_6868_MOESM4_ESM.pdf]

**Monotonic Ascending pattern genes with DE<4**

|    | <u>Ensembl Gene ID</u> | <u>Gene Names</u>  | <u>DE</u> | <u>p.value</u> | <u>q.value</u> | <u>SVDE</u> |
|----|------------------------|--------------------|-----------|----------------|----------------|-------------|
| 1  | ENSG00000025423        | <i>HSD17B6</i>     | 0         | 0              | 0              | 0           |
| 2  | ENSG00000072110        | <i>ACTN1</i>       | 0         | 0              | 0              | 0           |
| 3  | ENSG00000076716        | <i>GPC4</i>        | 0         | 0              | 0              | 0           |
| 4  | ENSG00000091986        | <i>CCDC80</i>      | 0         | 0              | 0              | 0           |
| 5  | ENSG00000099889        | <i>ARVCF</i>       | 0         | 0              | 0              | 0           |
| 6  | ENSG00000106799        | <i>TGFBR1</i>      | 0         | 0              | 0              | 0           |
| 7  | ENSG00000111799        | <i>COL12A1</i>     | 0         | 0              | 0              | 0           |
| 8  | ENSG00000115380        | <i>EFEMP1</i>      | 0         | 0              | 0              | 0           |
| 9  | ENSG00000118523        | <i>CCN2</i>        | 0         | 0              | 0              | 0           |
| 10 | ENSG00000119280        | <i>C1orf198</i>    | 0         | 0              | 0              | 0           |
| 11 | ENSG00000121989        | <i>ACVR2A</i>      | 0         | 0              | 0              | 0           |
| 12 | ENSG00000124212        | <i>PTGIS</i>       | 0         | 0              | 0              | 0           |
| 13 | ENSG00000124766        | <i>SOX4</i>        | 0         | 0              | 0              | 0           |
| 14 | ENSG00000162591        | <i>MEGF6</i>       | 0         | 0              | 0              | 0           |
| 15 | ENSG00000163431        | <i>LMOD1</i>       | 0         | 0              | 0              | 0           |
| 16 | ENSG00000165124        | <i>SVEP1</i>       | 0         | 0              | 0              | 0           |
| 17 | ENSG00000172037        | <i>LAMB2</i>       | 0         | 0              | 0              | 0           |
| 18 | ENSG00000172986        | <i>GXYLT2</i>      | 0         | 0              | 0              | 0           |
| 19 | ENSG00000183723        | <i>CMTM4</i>       | 0         | 0              | 0              | 0           |
| 20 | ENSG00000197381        | <i>ADARB1</i>      | 0         | 0              | 0              | 0           |
| 21 | ENSG00000187955        | <i>COL14A1</i>     | 0         | 0              | 0              | 0.01        |
| 22 | ENSG00000196924        | <i>FLNA</i>        | 0         | 0              | 0              | 0.01        |
| 23 | ENSG00000171388        | <i>APLN</i>        | 0         | 0              | 0              | 0.02        |
| 24 | ENSG00000171522        | <i>PTGER4</i>      | 0         | 0              | 0              | 0.02        |
| 25 | ENSG00000106823        | <i>ECM2</i>        | 0         | 0              | 0              | 0.03        |
| 26 | ENSG00000077157        | <i>PPP1R12B</i>    | 0         | 0              | 0              | 0.04        |
| 27 | ENSG00000274180        | <i>NATD1</i>       | 0         | 0              | 0              | 0.04        |
| 28 | ENSG00000154721        | <i>JAM2</i>        | 0         | 0              | 0              | 0.05        |
| 29 | ENSG00000072952        | <i>MRVI1</i>       | 0         | 0              | 0              | 0.06        |
| 30 | ENSG00000082512        | <i>TRAF5</i>       | 0         | 0              | 0              | 0.06        |
| 31 | ENSG00000060718        | <i>COL11A1</i>     | 0         | 0              | 0              | 0.07        |
| 32 | ENSG00000140092        | <i>FBLN5</i>       | 0         | 0              | 0              | 0.07        |
| 33 | ENSG00000175274        | <i>TP53I11</i>     | 0         | 0              | 0              | 0.09        |
| 34 | ENSG00000204381        | <i>LAYN</i>        | 0         | 0              | 0              | 0.09        |
| 35 | ENSG00000123095        | <i>BHLHE41</i>     | 0         | 0              | 0              | 0.12        |
| 36 | ENSG00000204580        | <i>DDR1</i>        | 0         | 0              | 0              | 0.16        |
| 37 | ENSG00000126803        | <i>HSPA2</i>       | 0         | 0              | 0              | 0.2         |
| 38 | ENSG00000140391        | <i>TSPAN3</i>      | 0         | 0              | 0              | 0.24        |
| 39 | ENSG00000139329        | <i>LUM</i>         | 0         | 0              | 0              | 0.25        |
| 40 | ENSG00000149596        | <i>JPH2</i>        | 0         | 0              | 0              | 0.26        |
| 41 | ENSG00000167244        | <i>IGF2</i>        | 0         | 0              | 0              | 0.31        |
| 42 | ENSG00000136156        | <i>ITM2B</i>       | 0         | 0              | 0              | 0.32        |
| 43 | ENSG00000253276        | <i>CCDC71L</i>     | 0         | 0              | 0              | 0.32        |
| 44 | ENSG00000100439        | <i>ABHD4</i>       | 0         | 0              | 0              | 0.33        |
| 45 | ENSG00000125730        | <i>C3</i>          | 0         | 0              | 0              | 0.5         |
| 46 | ENSG00000022267        | <i>FHL1</i>        | 0         | 0              | 0              | 0.53        |
| 47 | ENSG00000136048        | <i>DRAM1</i>       | 0         | 0              | 0              | 0.65        |
| 48 | ENSG00000152217        | <i>SETBP1</i>      | 0         | 0              | 0              | 1.03        |
| 49 | ENSG00000122642        | <i>FKBP9</i>       | 0         | 0              | 0              | 1.27        |
| 50 | ENSG00000139112        | <i>GABARAPL1</i>   | 0         | 0              | 0              | 1.52        |
| 51 | ENSG00000124225        | <i>PMEPA1</i>      | 1         | 6.38E-07       | 8.93E-05       | 0           |
| 52 | ENSG00000185561        | <i>TLCD2</i>       | 1         | 6.38E-07       | 8.93E-05       | 0           |
| 53 | ENSG00000104936        | <i>DMPK</i>        | 1         | 6.38E-07       | 8.93E-05       | 0.01        |
| 54 | ENSG00000135549        | <i>PKIB</i>        | 1         | 6.38E-07       | 8.93E-05       | 0.01        |
| 55 | ENSG00000183087        | <i>GAS6</i>        | 1         | 6.38E-07       | 8.93E-05       | 0.01        |
| 56 | ENSG00000101280        | <i>ANGPT4</i>      | 1         | 6.38E-07       | 8.93E-05       | 0.03        |
| 57 | ENSG00000171812        | <i>COL8A2</i>      | 1         | 6.38E-07       | 8.93E-05       | 0.03        |
| 58 | ENSG00000115461        | <i>IGFBP5</i>      | 1         | 6.38E-07       | 8.93E-05       | 0.05        |
| 59 | ENSG00000169871        | <i>TRIM56</i>      | 1         | 6.38E-07       | 8.93E-05       | 0.05        |
| 60 | ENSG00000109472        | <i>CPE</i>         | 1         | 6.38E-07       | 8.93E-05       | 0.07        |
| 61 | ENSG00000146477        | <i>SLC22A3</i>     | 1         | 6.38E-07       | 8.93E-05       | 0.09        |
| 62 | ENSG00000064666        | <i>CNN2</i>        | 1         | 6.38E-07       | 8.93E-05       | 0.12        |
| 63 | ENSG00000177363        | <i>LRRN4CL</i>     | 1         | 6.38E-07       | 8.93E-05       | 0.12        |
| 64 | ENSG00000197122        | <i>SRC</i>         | 1         | 6.38E-07       | 8.93E-05       | 0.16        |
| 65 | ENSG00000257335        | <i>MGAM</i>        | 1         | 6.38E-07       | 8.93E-05       | 0.18        |
| 66 | ENSG00000144476        | <i>ACKR3</i>       | 1         | 6.38E-07       | 8.93E-05       | 0.21        |
| 67 | ENSG00000068971        | <i>PPP2R5B</i>     | 1         | 6.38E-07       | 8.93E-05       | 0.24        |
| 68 | ENSG00000113140        | <i>SPARC</i>       | 1         | 6.38E-07       | 8.93E-05       | 0.25        |
| 69 | ENSG00000160285        | <i>LSS</i>         | 1         | 6.38E-07       | 8.93E-05       | 0.25        |
| 70 | ENSG00000120837        | <i>NFYB</i>        | 1         | 6.38E-07       | 8.93E-05       | 0.27        |
| 71 | ENSG00000135926        | <i>TMBIM1</i>      | 1         | 6.38E-07       | 8.93E-05       | 0.3         |
| 72 | ENSG00000139083        | <i>ETV6</i>        | 1         | 6.38E-07       | 8.93E-05       | 0.3         |
| 73 | ENSG00000164099        | <i>PRSS12</i>      | 1         | 6.38E-07       | 8.93E-05       | 0.32        |
| 74 | ENSG00000241399        | <i>CD302</i>       | 1         | 6.38E-07       | 8.93E-05       | 0.34        |
| 75 | ENSG00000142303        | <i>ADAMTS10</i>    | 1         | 6.38E-07       | 8.93E-05       | 0.35        |
| 76 | ENSG00000162458        | <i>FBLM1</i>       | 1         | 6.38E-07       | 8.93E-05       | 0.35        |
| 77 | ENSG00000153814        | <i>JAZF1</i>       | 1         | 6.38E-07       | 8.93E-05       | 0.36        |
| 78 | ENSG00000254087        | <i>LYN</i>         | 1         | 6.38E-07       | 8.93E-05       | 0.36        |
| 79 | ENSG00000171603        | <i>CLSTN1</i>      | 1         | 6.38E-07       | 8.93E-05       | 0.38        |
| 80 | ENSG00000159423        | <i>ALDH4A1</i>     | 1         | 6.38E-07       | 8.93E-05       | 0.39        |
| 81 | ENSG00000117394        | <i>SLC2A1</i>      | 1         | 6.38E-07       | 8.93E-05       | 0.4         |
| 82 | ENSG00000283154        | <i>IQCI-SCHIP1</i> | 1         | 6.38E-07       | 8.93E-05       | 0.4         |
| 83 | ENSG00000089472        | <i>HEPH</i>        | 1         | 6.38E-07       | 8.93E-05       | 0.42        |
| 84 | ENSG00000132003        | <i>ZSWIM4</i>      | 1         | 6.38E-07       | 8.93E-05       | 0.43        |
| 85 | ENSG00000146197        | <i>SCUBE3</i>      | 1         | 6.38E-07       | 8.93E-05       | 0.43        |
| 86 | ENSG00000101825        | <i>MXRA5</i>       | 1         | 6.38E-07       | 8.93E-05       | 0.48        |
| 87 | ENSG00000172201        | <i>ID4</i>         | 1         | 6.38E-07       | 8.93E-05       | 0.48        |
| 88 | ENSG00000081052        | <i>COL4A4</i>      | 1         | 6.38E-07       | 8.93E-05       | 0.49        |
| 89 | ENSG00000162512        | <i>SDC3</i>        | 1         | 6.38E-07       | 8.93E-05       | 0.49        |
| 90 | ENSG00000116774        | <i>OLFML3</i>      | 1         | 6.38E-07       | 8.93E-05       | 0.5         |
| 91 | ENSG00000144711        | <i>IQSEC1</i>      | 1         | 6.38E-07       | 8.93E-05       | 0.51        |

|     |                 |           |   |          |             |      |
|-----|-----------------|-----------|---|----------|-------------|------|
| 92  | ENSG00000171992 | SYNPO     | 1 | 6.38E-07 | 8.93E-05    | 0.51 |
| 93  | ENSG00000186635 | ARAP1     | 1 | 6.38E-07 | 8.93E-05    | 0.52 |
| 94  | ENSG00000182326 | C1S       | 1 | 6.38E-07 | 8.93E-05    | 0.54 |
| 95  | ENSG00000143126 | CELSR2    | 1 | 6.38E-07 | 8.93E-05    | 0.55 |
| 96  | ENSG00000079950 | STX7      | 1 | 6.38E-07 | 8.93E-05    | 0.56 |
| 97  | ENSG00000173599 | PC        | 1 | 6.38E-07 | 8.93E-05    | 0.57 |
| 98  | ENSG00000133619 | KRBA1     | 1 | 6.38E-07 | 8.93E-05    | 0.61 |
| 99  | ENSG00000137809 | ITGA11    | 1 | 6.38E-07 | 8.93E-05    | 0.62 |
| 100 | ENSG00000088756 | ARHGAP28  | 1 | 6.38E-07 | 8.93E-05    | 0.63 |
| 101 | ENSG00000066468 | FGFR2     | 1 | 6.38E-07 | 8.93E-05    | 0.82 |
| 102 | ENSG00000196549 | MME       | 1 | 6.38E-07 | 8.93E-05    | 0.98 |
| 103 | ENSG00000185565 | LSAMP     | 1 | 6.38E-07 | 8.93E-05    | 1.04 |
| 104 | ENSG00000110328 | GALNT18   | 1 | 6.38E-07 | 8.93E-05    | 1.07 |
| 105 | ENSG00000121898 | CPXM2     | 1 | 6.38E-07 | 8.93E-05    | 1.19 |
| 106 | ENSG00000150687 | PRSS23    | 1 | 6.38E-07 | 8.93E-05    | 1.52 |
| 107 | ENSG00000124785 | NRN1      | 1 | 6.38E-07 | 8.93E-05    | 1.69 |
| 108 | ENSG00000100100 | PIK3IP1   | 1 | 6.38E-07 | 8.93E-05    | 1.89 |
| 109 | ENSG00000214717 | ZBED1     | 2 | 8.94E-06 | 0.000522388 | 0.32 |
| 110 | ENSG00000076067 | RBMS2     | 2 | 8.94E-06 | 0.000522388 | 0    |
| 111 | ENSG00000118898 | PPL       | 2 | 8.94E-06 | 0.000522388 | 0    |
| 112 | ENSG00000124006 | OBSL1     | 2 | 8.94E-06 | 0.000522388 | 0    |
| 113 | ENSG00000125629 | INSIG2    | 2 | 8.94E-06 | 0.000522388 | 0    |
| 114 | ENSG00000130821 | SLC6A8    | 2 | 8.94E-06 | 0.000522388 | 0    |
| 115 | ENSG00000135424 | ITGA7     | 2 | 8.94E-06 | 0.000522388 | 0    |
| 116 | ENSG00000137094 | DNAJB5    | 2 | 8.94E-06 | 0.000522388 | 0    |
| 117 | ENSG00000137124 | ALDH1B1   | 2 | 8.94E-06 | 0.000522388 | 0    |
| 118 | ENSG00000172403 | SYNPO2    | 2 | 8.94E-06 | 0.000522388 | 0    |
| 119 | ENSG00000173281 | PPP1R3B   | 2 | 8.94E-06 | 0.000522388 | 0    |
| 120 | ENSG00000179403 | VWA1      | 2 | 8.94E-06 | 0.000522388 | 0    |
| 121 | ENSG00000182575 | NXPH3     | 2 | 8.94E-06 | 0.000522388 | 0    |
| 122 | ENSG00000183283 | DAZAP2    | 2 | 8.94E-06 | 0.000522388 | 0    |
| 123 | ENSG00000184304 | PRKD1     | 2 | 8.94E-06 | 0.000522388 | 0    |
| 124 | ENSG00000184702 | SEPTIN5   | 2 | 8.94E-06 | 0.000522388 | 0    |
| 125 | ENSG00000206190 | ATP10A    | 2 | 8.94E-06 | 0.000522388 | 0    |
| 126 | ENSG00000260230 | FRRS1L    | 2 | 8.94E-06 | 0.000522388 | 0    |
| 127 | ENSG00000125868 | DSTN      | 2 | 8.94E-06 | 0.000522388 | 0.01 |
| 128 | ENSG00000140443 | IGF1R     | 2 | 8.94E-06 | 0.000522388 | 0.01 |
| 129 | ENSG00000157570 | TSPAN18   | 2 | 8.94E-06 | 0.000522388 | 0.01 |
| 130 | ENSG00000173227 | SYT12     | 2 | 8.94E-06 | 0.000522388 | 0.01 |
| 131 | ENSG00000174697 | LEP       | 2 | 8.94E-06 | 0.000522388 | 0.01 |
| 132 | ENSG00000136720 | H56ST1    | 2 | 8.94E-06 | 0.000522388 | 0.02 |
| 133 | ENSG00000137285 | TUBB2B    | 2 | 8.94E-06 | 0.000522388 | 0.03 |
| 134 | ENSG00000164692 | COL1A2    | 2 | 8.94E-06 | 0.000522388 | 0.04 |
| 135 | ENSG00000171298 | GAA       | 2 | 8.94E-06 | 0.000522388 | 0.04 |
| 136 | ENSG00000161958 | FGF11     | 2 | 8.94E-06 | 0.000522388 | 0.05 |
| 137 | ENSG00000178772 | CPN2      | 2 | 8.94E-06 | 0.000522388 | 0.05 |
| 138 | ENSG00000137699 | TRIM29    | 2 | 8.94E-06 | 0.000522388 | 0.06 |
| 139 | ENSG00000152049 | KCNE4     | 2 | 8.94E-06 | 0.000522388 | 0.06 |
| 140 | ENSG00000077585 | GPR137B   | 2 | 8.94E-06 | 0.000522388 | 0.07 |
| 141 | ENSG00000137507 | LRRC32    | 2 | 8.94E-06 | 0.000522388 | 0.07 |
| 142 | ENSG00000164808 | SPIDR     | 2 | 8.94E-06 | 0.000522388 | 0.07 |
| 143 | ENSG00000171533 | MAP6      | 2 | 8.94E-06 | 0.000522388 | 0.07 |
| 144 | ENSG00000132613 | MTSS2     | 2 | 8.94E-06 | 0.000522388 | 0.09 |
| 145 | ENSG00000135919 | SERPINE2  | 2 | 8.94E-06 | 0.000522388 | 0.09 |
| 146 | ENSG00000090861 | AARS      | 2 | 8.94E-06 | 0.000522388 | 0.1  |
| 147 | ENSG00000138080 | EMILIN1   | 2 | 8.94E-06 | 0.000522388 | 0.1  |
| 148 | ENSG00000158008 | EXTL1     | 2 | 8.94E-06 | 0.000522388 | 0.1  |
| 149 | ENSG00000143499 | SMYD2     | 2 | 8.94E-06 | 0.000522388 | 0.12 |
| 150 | ENSG00000198695 | MT-ND6    | 2 | 8.94E-06 | 0.000522388 | 0.14 |
| 151 | ENSG00000121067 | SPOP      | 2 | 8.94E-06 | 0.000522388 | 0.15 |
| 152 | ENSG00000148926 | ADM       | 2 | 8.94E-06 | 0.000522388 | 0.16 |
| 153 | ENSG00000163083 | INHBB     | 2 | 8.94E-06 | 0.000522388 | 0.17 |
| 154 | ENSG00000117115 | PADI2     | 2 | 8.94E-06 | 0.000522388 | 0.18 |
| 155 | ENSG00000139178 | C1RL      | 2 | 8.94E-06 | 0.000522388 | 0.18 |
| 156 | ENSG00000162520 | SYNC      | 2 | 8.94E-06 | 0.000522388 | 0.18 |
| 157 | ENSG00000072195 | SPEG      | 2 | 8.94E-06 | 0.000522388 | 0.2  |
| 158 | ENSG00000111907 | TPD52L1   | 2 | 8.94E-06 | 0.000522388 | 0.2  |
| 159 | ENSG00000172530 | BANP      | 2 | 8.94E-06 | 0.000522388 | 0.2  |
| 160 | ENSG00000119862 | LGALS1    | 2 | 8.94E-06 | 0.000522388 | 0.24 |
| 161 | ENSG00000154864 | PIEZO2    | 2 | 8.94E-06 | 0.000522388 | 0.24 |
| 162 | ENSG00000166924 | NYAP1     | 2 | 8.94E-06 | 0.000522388 | 0.24 |
| 163 | ENSG00000173546 | CSPG4     | 2 | 8.94E-06 | 0.000522388 | 0.25 |
| 164 | ENSG00000056998 | GYG2      | 2 | 8.94E-06 | 0.000522388 | 0.26 |
| 165 | ENSG00000130176 | CNN1      | 2 | 8.94E-06 | 0.000522388 | 0.26 |
| 166 | ENSG00000108840 | HDAC5     | 2 | 8.94E-06 | 0.000522388 | 0.27 |
| 167 | ENSG00000167693 | NXN       | 2 | 8.94E-06 | 0.000522388 | 0.28 |
| 168 | ENSG00000170370 | EMX2      | 2 | 8.94E-06 | 0.000522388 | 0.28 |
| 169 | ENSG00000090565 | RAB11FIP3 | 2 | 8.94E-06 | 0.000522388 | 0.29 |
| 170 | ENSG00000132000 | PODNL1    | 2 | 8.94E-06 | 0.000522388 | 0.3  |
| 171 | ENSG00000172575 | RASGRP1   | 2 | 8.94E-06 | 0.000522388 | 0.3  |
| 172 | ENSG00000100345 | MYH9      | 2 | 8.94E-06 | 0.000522388 | 0.32 |
| 173 | ENSG00000115828 | QPCT      | 2 | 8.94E-06 | 0.000522388 | 0.32 |
| 174 | ENSG00000150510 | FAM124A   | 2 | 8.94E-06 | 0.000522388 | 0.32 |
| 175 | ENSG00000156804 | FBXO32    | 2 | 8.94E-06 | 0.000522388 | 0.32 |
| 176 | ENSG00000099994 | SUSD2     | 2 | 8.94E-06 | 0.000522388 | 0.33 |
| 177 | ENSG00000123243 | ITIHS     | 2 | 8.94E-06 | 0.000522388 | 0.33 |
| 178 | ENSG00000145687 | SSBP2     | 2 | 8.94E-06 | 0.000522388 | 0.33 |
| 179 | ENSG00000166387 | PPFIBP2   | 2 | 8.94E-06 | 0.000522388 | 0.35 |
| 180 | ENSG00000180914 | OXTR      | 2 | 8.94E-06 | 0.000522388 | 0.35 |
| 181 | ENSG00000198853 | RUSC2     | 2 | 8.94E-06 | 0.000522388 | 0.35 |
| 182 | ENSG00000064042 | LIMCH1    | 2 | 8.94E-06 | 0.000522388 | 0.36 |
| 183 | ENSG00000197635 | PPP4      | 2 | 8.94E-06 | 0.000522388 | 0.36 |
| 184 | ENSG00000099282 | TSPAN15   | 2 | 8.94E-06 | 0.000522388 | 0.38 |
| 185 | ENSG00000136436 | CALCOCO2  | 2 | 8.94E-06 | 0.000522388 | 0.38 |

|     |                  |          |   |             |             |      |
|-----|------------------|----------|---|-------------|-------------|------|
| 186 | ENSG00000099864  | PALM     | 2 | 8.94E-06    | 0.000522388 | 0.39 |
| 187 | ENSG00000118518  | RNF146   | 2 | 8.94E-06    | 0.000522388 | 0.39 |
| 188 | ENSG00000123240  | OPTN     | 2 | 8.94E-06    | 0.000522388 | 0.39 |
| 189 | ENSG00000169439  | SDC2     | 2 | 8.94E-06    | 0.000522388 | 0.4  |
| 190 | ENSG00000126603  | GLIS2    | 2 | 8.94E-06    | 0.000522388 | 0.41 |
| 191 | ENSG00000197614  | MFAP5    | 2 | 8.94E-06    | 0.000522388 | 0.41 |
| 192 | ENSG00000103044  | HAS3     | 2 | 8.94E-06    | 0.000522388 | 0.42 |
| 193 | ENSG00000134030  | CTIF     | 2 | 8.94E-06    | 0.000522388 | 0.42 |
| 194 | ENSG00000146278  | PNRC1    | 2 | 8.94E-06    | 0.000522388 | 0.42 |
| 195 | ENSG00000156171  | DRAM2    | 2 | 8.94E-06    | 0.000522388 | 0.42 |
| 196 | ENSG00000182749  | PAQR7    | 2 | 8.94E-06    | 0.000522388 | 0.42 |
| 197 | ENSG00000158258  | CLSTN2   | 2 | 8.94E-06    | 0.000522388 | 0.43 |
| 198 | ENSG00000174804  | FZD4     | 2 | 8.94E-06    | 0.000522388 | 0.43 |
| 199 | ENSG00000182985  | CADM1    | 2 | 8.94E-06    | 0.000522388 | 0.43 |
| 200 | ENSG00000112655  | PTK7     | 2 | 8.94E-06    | 0.000522388 | 0.44 |
| 201 | ENSG00000178573  | MAF      | 2 | 8.94E-06    | 0.000522388 | 0.44 |
| 202 | ENSG00000120899  | PTK2B    | 2 | 8.94E-06    | 0.000522388 | 0.45 |
| 203 | ENSG00000122644  | ARL4A    | 2 | 8.94E-06    | 0.000522388 | 0.45 |
| 204 | ENSG00000126778  | SIX1     | 2 | 8.94E-06    | 0.000522388 | 0.45 |
| 205 | ENSG00000135299  | ANKRD6   | 2 | 8.94E-06    | 0.000522388 | 0.46 |
| 206 | ENSG00000108821  | COL1A1   | 2 | 8.94E-06    | 0.000522388 | 0.47 |
| 207 | ENSG00000071282  | LMCD1    | 2 | 8.94E-06    | 0.000522388 | 0.48 |
| 208 | ENSG00000164684  | ZNF704   | 2 | 8.94E-06    | 0.000522388 | 0.48 |
| 209 | ENSG00000183255  | PTTG1IP  | 2 | 8.94E-06    | 0.000522388 | 0.48 |
| 210 | ENSG00000107796  | ACTA2    | 2 | 8.94E-06    | 0.000522388 | 0.49 |
| 211 | ENSG00000139174  | PRICKLE1 | 2 | 8.94E-06    | 0.000522388 | 0.49 |
| 212 | ENSG00000101265  | RASSF2   | 2 | 8.94E-06    | 0.000522388 | 0.5  |
| 213 | ENSG00000112182  | BACH2    | 2 | 8.94E-06    | 0.000522388 | 0.5  |
| 214 | ENSG00000169991  | IFFO2    | 2 | 8.94E-06    | 0.000522388 | 0.5  |
| 215 | ENSG00000181264  | TLCD5    | 2 | 8.94E-06    | 0.000522388 | 0.5  |
| 216 | ENSG00000139567  | ACVRL1   | 2 | 8.94E-06    | 0.000522388 | 0.51 |
| 217 | ENSG00000168453  | HR       | 2 | 8.94E-06    | 0.000522388 | 0.53 |
| 218 | ENSG00000171055  | FEZ2     | 2 | 8.94E-06    | 0.000522388 | 0.53 |
| 219 | ENSG00000170271  | FAXDC2   | 2 | 8.94E-06    | 0.000522388 | 0.55 |
| 220 | ENSG00000157766  | ACAN     | 2 | 8.94E-06    | 0.000522388 | 0.56 |
| 221 | ENSG00000173757  | STAT5B   | 2 | 8.94E-06    | 0.000522388 | 0.56 |
| 222 | ENSG00000170542  | SERPINB9 | 2 | 8.94E-06    | 0.000522388 | 0.58 |
| 223 | ENSG00000197324  | LRP10    | 2 | 8.94E-06    | 0.000522388 | 0.58 |
| 224 | ENSG00000001523  | CEP68    | 2 | 8.94E-06    | 0.000522388 | 0.59 |
| 225 | ENSG00000182118  | FAM89A   | 2 | 8.94E-06    | 0.000522388 | 0.59 |
| 226 | ENSG00000060656  | PTPRU    | 2 | 8.94E-06    | 0.000522388 | 0.6  |
| 227 | ENSG00000142910  | TINAGL1  | 2 | 8.94E-06    | 0.000522388 | 0.6  |
| 228 | ENSG00000196323  | ZBTB44   | 2 | 8.94E-06    | 0.000522388 | 0.62 |
| 229 | ENSG000000004399 | PLXND1   | 2 | 8.94E-06    | 0.000522388 | 0.64 |
| 230 | ENSG00000131171  | SH3BGRL  | 2 | 8.94E-06    | 0.000522388 | 0.67 |
| 231 | ENSG00000149131  | SERPING1 | 2 | 8.94E-06    | 0.000522388 | 0.69 |
| 232 | ENSG00000171105  | INSR     | 2 | 8.94E-06    | 0.000522388 | 0.72 |
| 233 | ENSG00000001465  | DCN      | 2 | 8.94E-06    | 0.000522388 | 0.75 |
| 234 | ENSG00000116679  | IVNS1ABP | 2 | 8.94E-06    | 0.000522388 | 0.76 |
| 235 | ENSG00000119950  | MXI1     | 2 | 8.94E-06    | 0.000522388 | 0.77 |
| 236 | ENSG00000121964  | GTDC1    | 2 | 8.94E-06    | 0.000522388 | 0.77 |
| 237 | ENSG00000185052  | SLC24A3  | 2 | 8.94E-06    | 0.000522388 | 0.77 |
| 238 | ENSG00000146674  | IGFBP3   | 2 | 8.94E-06    | 0.000522388 | 0.78 |
| 239 | ENSG00000197361  | FBXL22   | 2 | 8.94E-06    | 0.000522388 | 0.82 |
| 240 | ENSG00000155858  | LSM11    | 2 | 8.94E-06    | 0.000522388 | 0.83 |
| 241 | ENSG00000182218  | HHIPL1   | 2 | 8.94E-06    | 0.000522388 | 0.84 |
| 242 | ENSG00000126351  | THRA     | 2 | 8.94E-06    | 0.000522388 | 0.86 |
| 243 | ENSG00000134986  | NREP     | 2 | 8.94E-06    | 0.000522388 | 0.86 |
| 244 | ENSG00000070413  | DGCR2    | 2 | 8.94E-06    | 0.000522388 | 0.87 |
| 245 | ENSG00000144455  | SUMF1    | 2 | 8.94E-06    | 0.000522388 | 0.92 |
| 246 | ENSG00000157837  | SPPL3    | 2 | 8.94E-06    | 0.000522388 | 0.94 |
| 247 | ENSG00000163346  | PBXIP1   | 2 | 8.94E-06    | 0.000522388 | 0.94 |
| 248 | ENSG00000101605  | MYOM1    | 2 | 8.94E-06    | 0.000522388 | 1.09 |
| 249 | ENSG00000171160  | MORN4    | 2 | 8.94E-06    | 0.000522388 | 1.1  |
| 250 | ENSG00000154330  | PGM5     | 2 | 8.94E-06    | 0.000522388 | 1.15 |
| 251 | ENSG00000104321  | TRPA1    | 2 | 8.94E-06    | 0.000522388 | 1.24 |
| 252 | ENSG00000133392  | MYH11    | 2 | 8.94E-06    | 0.000522388 | 1.24 |
| 253 | ENSG00000148175  | STOM     | 2 | 8.94E-06    | 0.000522388 | 1.33 |
| 254 | ENSG00000186866  | POFUT2   | 2 | 8.94E-06    | 0.000522388 | 1.48 |
| 255 | ENSG00000072954  | TMEM38A  | 2 | 8.94E-06    | 0.000522388 | 1.51 |
| 256 | ENSG00000142871  | CCN1     | 2 | 8.94E-06    | 0.000522388 | 1.57 |
| 257 | ENSG00000114853  | ZBTB47   | 2 | 8.94E-06    | 0.000522388 | 1.6  |
| 258 | ENSG00000099204  | ABLIM1   | 2 | 8.94E-06    | 0.000522388 | 1.62 |
| 259 | ENSG00000134243  | SORT1    | 2 | 8.94E-06    | 0.000522388 | 2.04 |
| 260 | ENSG00000006042  | TMEM98   | 3 | 0.000105955 | 0.003167939 | 0    |
| 261 | ENSG000000038002 | AGA      | 3 | 0.000105955 | 0.003167939 | 0    |
| 262 | ENSG00000063660  | GPC1     | 3 | 0.000105955 | 0.003167939 | 0    |
| 263 | ENSG00000121039  | RDH10    | 3 | 0.000105955 | 0.003167939 | 0    |
| 264 | ENSG00000130684  | ZNF337   | 3 | 0.000105955 | 0.003167939 | 0    |
| 265 | ENSG00000136002  | ARHGEF4  | 3 | 0.000105955 | 0.003167939 | 0    |
| 266 | ENSG00000152284  | TCF7L1   | 3 | 0.000105955 | 0.003167939 | 0    |
| 267 | ENSG00000157693  | TMEM268  | 3 | 0.000105955 | 0.003167939 | 0    |
| 268 | ENSG00000162878  | PKDCC    | 3 | 0.000105955 | 0.003167939 | 0    |
| 269 | ENSG00000164066  | INTU     | 3 | 0.000105955 | 0.003167939 | 0    |
| 270 | ENSG00000168763  | CNNM3    | 3 | 0.000105955 | 0.003167939 | 0    |
| 271 | ENSG00000175183  | CSRP2    | 3 | 0.000105955 | 0.003167939 | 0    |
| 272 | ENSG00000181744  | DIPK2A   | 3 | 0.000105955 | 0.003167939 | 0    |
| 273 | ENSG00000182247  | UBE2E2   | 3 | 0.000105955 | 0.003167939 | 0    |
| 274 | ENSG00000188092  | GPR89B   | 3 | 0.000105955 | 0.003167939 | 0    |
| 275 | ENSG00000196843  | ARID5A   | 3 | 0.000105955 | 0.003167939 | 0    |
| 276 | ENSG00000253293  | HOXA10   | 3 | 0.000105955 | 0.003167939 | 0    |
| 277 | ENSG000000000003 | TSPAN6   | 3 | 0.000105955 | 0.003167939 | 0.01 |
| 278 | ENSG00000116273  | PHF13    | 3 | 0.000105955 | 0.003167939 | 0.01 |
| 279 | ENSG00000151729  | SLC25A4  | 3 | 0.000105955 | 0.003167939 | 0.01 |

|     |                  |           |   |             |             |      |
|-----|------------------|-----------|---|-------------|-------------|------|
| 280 | ENSG00000155760  | FZD7      | 3 | 0.000105955 | 0.003167939 | 0.01 |
| 281 | ENSG00000160310  | PRMT2     | 3 | 0.000105955 | 0.003167939 | 0.01 |
| 282 | ENSG00000164188  | RANBP3L   | 3 | 0.000105955 | 0.003167939 | 0.01 |
| 283 | ENSG00000188112  | C6orf132  | 3 | 0.000105955 | 0.003167939 | 0.03 |
| 284 | ENSG00000213614  | HEXA      | 3 | 0.000105955 | 0.003167939 | 0.03 |
| 285 | ENSG00000110042  | DTX4      | 3 | 0.000105955 | 0.003167939 | 0.04 |
| 286 | ENSG00000115457  | IGFBP2    | 3 | 0.000105955 | 0.003167939 | 0.04 |
| 287 | ENSG00000135245  | HILPDA    | 3 | 0.000105955 | 0.003167939 | 0.04 |
| 288 | ENSG00000182253  | SYNM      | 3 | 0.000105955 | 0.003167939 | 0.04 |
| 289 | ENSG00000101608  | MYL12A    | 3 | 0.000105955 | 0.003167939 | 0.05 |
| 290 | ENSG00000145901  | TNIP1     | 3 | 0.000105955 | 0.003167939 | 0.05 |
| 291 | ENSG00000010030  | ETV7      | 3 | 0.000105955 | 0.003167939 | 0.07 |
| 292 | ENSG00000064225  | ST3GAL6   | 3 | 0.000105955 | 0.003167939 | 0.07 |
| 293 | ENSG00000109107  | ALDOC     | 3 | 0.000105955 | 0.003167939 | 0.07 |
| 294 | ENSG00000135823  | STX6      | 3 | 0.000105955 | 0.003167939 | 0.07 |
| 295 | ENSG00000142687  | KIAA0319L | 3 | 0.000105955 | 0.003167939 | 0.07 |
| 296 | ENSG00000149571  | KIRREL3   | 3 | 0.000105955 | 0.003167939 | 0.07 |
| 297 | ENSG00000174945  | AMZ1      | 3 | 0.000105955 | 0.003167939 | 0.07 |
| 298 | ENSG00000100154  | TTC28     | 3 | 0.000105955 | 0.003167939 | 0.08 |
| 299 | ENSG00000162551  | ALPL      | 3 | 0.000105955 | 0.003167939 | 0.08 |
| 300 | ENSG00000204128  | C2orf72   | 3 | 0.000105955 | 0.003167939 | 0.08 |
| 301 | ENSG00000119938  | PPP1R3C   | 3 | 0.000105955 | 0.003167939 | 0.09 |
| 302 | ENSG00000148180  | GSN       | 3 | 0.000105955 | 0.003167939 | 0.09 |
| 303 | ENSG00000164176  | EDIL3     | 3 | 0.000105955 | 0.003167939 | 0.09 |
| 304 | ENSG00000167930  | FAM234A   | 3 | 0.000105955 | 0.003167939 | 0.09 |
| 305 | ENSG00000178184  | PARD6G    | 3 | 0.000105955 | 0.003167939 | 0.09 |
| 306 | ENSG00000113721  | PDGFRB    | 3 | 0.000105955 | 0.003167939 | 0.1  |
| 307 | ENSG00000197355  | UAP1L1    | 3 | 0.000105955 | 0.003167939 | 0.1  |
| 308 | ENSG00000158186  | MRAS      | 3 | 0.000105955 | 0.003167939 | 0.13 |
| 309 | ENSG00000240771  | ARHGEF25  | 3 | 0.000105955 | 0.003167939 | 0.13 |
| 310 | ENSG00000059804  | SLC2A3    | 3 | 0.000105955 | 0.003167939 | 0.14 |
| 311 | ENSG00000124762  | CDKN1A    | 3 | 0.000105955 | 0.003167939 | 0.14 |
| 312 | ENSG00000173020  | GRK2      | 3 | 0.000105955 | 0.003167939 | 0.14 |
| 313 | ENSG00000176658  | MYO1D     | 3 | 0.000105955 | 0.003167939 | 0.14 |
| 314 | ENSG00000198663  | C6orf89   | 3 | 0.000105955 | 0.003167939 | 0.14 |
| 315 | ENSG00000131398  | KCNC3     | 3 | 0.000105955 | 0.003167939 | 0.15 |
| 316 | ENSG00000158555  | GDPD5     | 3 | 0.000105955 | 0.003167939 | 0.15 |
| 317 | ENSG00000179859  | RNF227    | 3 | 0.000105955 | 0.003167939 | 0.15 |
| 318 | ENSG00000122176  | RMOD      | 3 | 0.000105955 | 0.003167939 | 0.16 |
| 319 | ENSG00000140511  | HAPLN3    | 3 | 0.000105955 | 0.003167939 | 0.17 |
| 320 | ENSG00000165312  | OTUD1     | 3 | 0.000105955 | 0.003167939 | 0.17 |
| 321 | ENSG00000054277  | OPN3      | 3 | 0.000105955 | 0.003167939 | 0.18 |
| 322 | ENSG00000156976  | EIF4A2    | 3 | 0.000105955 | 0.003167939 | 0.18 |
| 323 | ENSG00000164236  | ANKRD33B  | 3 | 0.000105955 | 0.003167939 | 0.18 |
| 324 | ENSG00000187231  | SESTD1    | 3 | 0.000105955 | 0.003167939 | 0.18 |
| 325 | ENSG00000130592  | LSP1      | 3 | 0.000105955 | 0.003167939 | 0.19 |
| 326 | ENSG00000136960  | ENPP2     | 3 | 0.000105955 | 0.003167939 | 0.19 |
| 327 | ENSG00000162849  | KIF26B    | 3 | 0.000105955 | 0.003167939 | 0.19 |
| 328 | ENSG00000173801  | JUP       | 3 | 0.000105955 | 0.003167939 | 0.19 |
| 329 | ENSG00000101400  | SNTA1     | 3 | 0.000105955 | 0.003167939 | 0.2  |
| 330 | ENSG00000117791  | MARC2     | 3 | 0.000105955 | 0.003167939 | 0.2  |
| 331 | ENSG00000123427  | EEF1AKMT3 | 3 | 0.000105955 | 0.003167939 | 0.2  |
| 332 | ENSG00000136274  | NACAD     | 3 | 0.000105955 | 0.003167939 | 0.2  |
| 333 | ENSG00000147533  | GOLGA7    | 3 | 0.000105955 | 0.003167939 | 0.2  |
| 334 | ENSG00000148344  | PTGES     | 3 | 0.000105955 | 0.003167939 | 0.2  |
| 335 | ENSG00000171680  | PLEKHG5   | 3 | 0.000105955 | 0.003167939 | 0.2  |
| 336 | ENSG00000184481  | FOXO4     | 3 | 0.000105955 | 0.003167939 | 0.2  |
| 337 | ENSG00000105290  | ALPL1     | 3 | 0.000105955 | 0.003167939 | 0.21 |
| 338 | ENSG00000120594  | PLXDC2    | 3 | 0.000105955 | 0.003167939 | 0.21 |
| 339 | ENSG00000129353  | SLC44A2   | 3 | 0.000105955 | 0.003167939 | 0.21 |
| 340 | ENSG00000130024  | PHF10     | 3 | 0.000105955 | 0.003167939 | 0.21 |
| 341 | ENSG00000134198  | TSPAN2    | 3 | 0.000105955 | 0.003167939 | 0.21 |
| 342 | ENSG00000182168  | UNC5C     | 3 | 0.000105955 | 0.003167939 | 0.21 |
| 343 | ENSG00000221869  | CEBPD     | 3 | 0.000105955 | 0.003167939 | 0.21 |
| 344 | ENSG00000122547  | EEPD1     | 3 | 0.000105955 | 0.003167939 | 0.22 |
| 345 | ENSG00000175899  | A2M       | 3 | 0.000105955 | 0.003167939 | 0.22 |
| 346 | ENSG00000053254  | FOXN3     | 3 | 0.000105955 | 0.003167939 | 0.23 |
| 347 | ENSG00000113319  | RASGRF2   | 3 | 0.000105955 | 0.003167939 | 0.23 |
| 348 | ENSG00000157240  | FZD1      | 3 | 0.000105955 | 0.003167939 | 0.23 |
| 349 | ENSG00000163516  | ANKZF1    | 3 | 0.000105955 | 0.003167939 | 0.23 |
| 350 | ENSG00000159461  | AMFR      | 3 | 0.000105955 | 0.003167939 | 0.24 |
| 351 | ENSG00000141580  | WDR45B    | 3 | 0.000105955 | 0.003167939 | 0.25 |
| 352 | ENSG00000105664  | COMP      | 3 | 0.000105955 | 0.003167939 | 0.26 |
| 353 | ENSG00000127241  | MASP1     | 3 | 0.000105955 | 0.003167939 | 0.27 |
| 354 | ENSG00000151067  | CACNA1C   | 3 | 0.000105955 | 0.003167939 | 0.27 |
| 355 | ENSG00000174132  | FAM174A   | 3 | 0.000105955 | 0.003167939 | 0.27 |
| 356 | ENSG00000176485  | PLAAT3    | 3 | 0.000105955 | 0.003167939 | 0.27 |
| 357 | ENSG00000152767  | FARP1     | 3 | 0.000105955 | 0.003167939 | 0.28 |
| 358 | ENSG00000165507  | DEPP1     | 3 | 0.000105955 | 0.003167939 | 0.28 |
| 359 | ENSG00000007866  | TEAD3     | 3 | 0.000105955 | 0.003167939 | 0.29 |
| 360 | ENSG00000135070  | ISCA1     | 3 | 0.000105955 | 0.003167939 | 0.29 |
| 361 | ENSG00000135916  | ITM2C     | 3 | 0.000105955 | 0.003167939 | 0.29 |
| 362 | ENSG00000166448  | TMEM130   | 3 | 0.000105955 | 0.003167939 | 0.29 |
| 363 | ENSG00000170153  | RNF150    | 3 | 0.000105955 | 0.003167939 | 0.29 |
| 364 | ENSG00000158292  | GPR153    | 3 | 0.000105955 | 0.003167939 | 0.3  |
| 365 | ENSG00000160445  | ZER1      | 3 | 0.000105955 | 0.003167939 | 0.3  |
| 366 | ENSG00000116157  | GPX7      | 3 | 0.000105955 | 0.003167939 | 0.31 |
| 367 | ENSG00000154511  | DIPK1A    | 3 | 0.000105955 | 0.003167939 | 0.31 |
| 368 | ENSG00000250644  | n_a       | 3 | 0.000105955 | 0.003167939 | 0.31 |
| 369 | ENSG00000131791  | PRKAB2    | 3 | 0.000105955 | 0.003167939 | 0.32 |
| 370 | ENSG00000175220  | ARHGAP1   | 3 | 0.000105955 | 0.003167939 | 0.32 |
| 371 | ENSG000000012171 | SEMA3B    | 3 | 0.000105955 | 0.003167939 | 0.33 |
| 372 | ENSG00000107331  | ABCA2     | 3 | 0.000105955 | 0.003167939 | 0.33 |
| 373 | ENSG00000164093  | PITX2     | 3 | 0.000105955 | 0.003167939 | 0.33 |

|     |                 |           |   |             |             |      |
|-----|-----------------|-----------|---|-------------|-------------|------|
| 374 | ENSG00000165996 | HACD1     | 3 | 0.000105955 | 0.003167939 | 0.33 |
| 375 | ENSG00000068976 | PYGM      | 3 | 0.000105955 | 0.003167939 | 0.34 |
| 376 | ENSG00000135636 | DYSF      | 3 | 0.000105955 | 0.003167939 | 0.35 |
| 377 | ENSG00000013288 | MAN2B2    | 3 | 0.000105955 | 0.003167939 | 0.36 |
| 378 | ENSG00000107738 | VSIR      | 3 | 0.000105955 | 0.003167939 | 0.36 |
| 379 | ENSG00000130703 | OSBPL2    | 3 | 0.000105955 | 0.003167939 | 0.36 |
| 380 | ENSG00000181588 | MEX3D     | 3 | 0.000105955 | 0.003167939 | 0.36 |
| 381 | ENSG00000185499 | MUC1      | 3 | 0.000105955 | 0.003167939 | 0.36 |
| 382 | ENSG00000075240 | GRAMD4    | 3 | 0.000105955 | 0.003167939 | 0.37 |
| 383 | ENSG00000082196 | CIQTNF3   | 3 | 0.000105955 | 0.003167939 | 0.37 |
| 384 | ENSG00000109944 | JHY       | 3 | 0.000105955 | 0.003167939 | 0.37 |
| 385 | ENSG00000128294 | TPST2     | 3 | 0.000105955 | 0.003167939 | 0.37 |
| 386 | ENSG00000135452 | TSPAN31   | 3 | 0.000105955 | 0.003167939 | 0.37 |
| 387 | ENSG00000188042 | ARL4C     | 3 | 0.000105955 | 0.003167939 | 0.37 |
| 388 | ENSG00000144647 | POMGNT2   | 3 | 0.000105955 | 0.003167939 | 0.38 |
| 389 | ENSG00000184545 | DUSP8     | 3 | 0.000105955 | 0.003167939 | 0.38 |
| 390 | ENSG00000153179 | RASSF3    | 3 | 0.000105955 | 0.003167939 | 0.39 |
| 391 | ENSG00000169231 | THBS3     | 3 | 0.000105955 | 0.003167939 | 0.39 |
| 392 | ENSG00000100504 | PYGL      | 3 | 0.000105955 | 0.003167939 | 0.4  |
| 393 | ENSG00000109743 | BST1      | 3 | 0.000105955 | 0.003167939 | 0.4  |
| 394 | ENSG00000135929 | CYP27A1   | 3 | 0.000105955 | 0.003167939 | 0.4  |
| 395 | ENSG00000144218 | AFF3      | 3 | 0.000105955 | 0.003167939 | 0.4  |
| 396 | ENSG00000144681 | STAC      | 3 | 0.000105955 | 0.003167939 | 0.4  |
| 397 | ENSG00000154553 | PDLM3     | 3 | 0.000105955 | 0.003167939 | 0.4  |
| 398 | ENSG00000187479 | C11orf96  | 3 | 0.000105955 | 0.003167939 | 0.4  |
| 399 | ENSG00000163430 | FSTL1     | 3 | 0.000105955 | 0.003167939 | 0.41 |
| 400 | ENSG00000198732 | SMOC1     | 3 | 0.000105955 | 0.003167939 | 0.41 |
| 401 | ENSG00000108352 | RAPGEFL1  | 3 | 0.000105955 | 0.003167939 | 0.42 |
| 402 | ENSG00000157978 | LDLRAP1   | 3 | 0.000105955 | 0.003167939 | 0.42 |
| 403 | ENSG00000034053 | APBA2     | 3 | 0.000105955 | 0.003167939 | 0.43 |
| 404 | ENSG00000138433 | CIR1      | 3 | 0.000105955 | 0.003167939 | 0.43 |
| 405 | ENSG00000143995 | MEIS1     | 3 | 0.000105955 | 0.003167939 | 0.43 |
| 406 | ENSG00000198542 | ITGBL1    | 3 | 0.000105955 | 0.003167939 | 0.43 |
| 407 | ENSG00000077420 | APBB1IP   | 3 | 0.000105955 | 0.003167939 | 0.44 |
| 408 | ENSG00000083750 | RRAGB     | 3 | 0.000105955 | 0.003167939 | 0.44 |
| 409 | ENSG00000142583 | SLC2A5    | 3 | 0.000105955 | 0.003167939 | 0.44 |
| 410 | ENSG00000164751 | PEX2      | 3 | 0.000105955 | 0.003167939 | 0.44 |
| 411 | ENSG00000070404 | FSTL3     | 3 | 0.000105955 | 0.003167939 | 0.45 |
| 412 | ENSG00000143409 | MINDY1    | 3 | 0.000105955 | 0.003167939 | 0.45 |
| 413 | ENSG00000148737 | TCF7L2    | 3 | 0.000105955 | 0.003167939 | 0.46 |
| 414 | ENSG00000069535 | MAOB      | 3 | 0.000105955 | 0.003167939 | 0.47 |
| 415 | ENSG00000104324 | CPQ       | 3 | 0.000105955 | 0.003167939 | 0.47 |
| 416 | ENSG00000119673 | ACOT2     | 3 | 0.000105955 | 0.003167939 | 0.47 |
| 417 | ENSG00000119979 | FAM45A    | 3 | 0.000105955 | 0.003167939 | 0.47 |
| 418 | ENSG00000145681 | HAPLN1    | 3 | 0.000105955 | 0.003167939 | 0.47 |
| 419 | ENSG00000176171 | BNIP3     | 3 | 0.000105955 | 0.003167939 | 0.47 |
| 420 | ENSG00000184922 | FMNL1     | 3 | 0.000105955 | 0.003167939 | 0.47 |
| 421 | ENSG00000112079 | STK38     | 3 | 0.000105955 | 0.003167939 | 0.49 |
| 422 | ENSG00000147027 | TMEM47    | 3 | 0.000105955 | 0.003167939 | 0.49 |
| 423 | ENSG00000204852 | TCTN1     | 3 | 0.000105955 | 0.003167939 | 0.49 |
| 424 | ENSG00000071967 | CYBRD1    | 3 | 0.000105955 | 0.003167939 | 0.5  |
| 425 | ENSG00000213625 | LEPROT    | 3 | 0.000105955 | 0.003167939 | 0.5  |
| 426 | ENSG00000275023 | MLLT6     | 3 | 0.000105955 | 0.003167939 | 0.5  |
| 427 | ENSG00000164050 | PLXNB1    | 3 | 0.000105955 | 0.003167939 | 0.51 |
| 428 | ENSG00000167641 | PPP1R14A  | 3 | 0.000105955 | 0.003167939 | 0.51 |
| 429 | ENSG00000183346 | CABCOC1   | 3 | 0.000105955 | 0.003167939 | 0.51 |
| 430 | ENSG00000241839 | PLEKHO2   | 3 | 0.000105955 | 0.003167939 | 0.51 |
| 431 | ENSG00000162645 | GBP2      | 3 | 0.000105955 | 0.003167939 | 0.52 |
| 432 | ENSG00000168542 | COL3A1    | 3 | 0.000105955 | 0.003167939 | 0.52 |
| 433 | ENSG00000198728 | LDB1      | 3 | 0.000105955 | 0.003167939 | 0.53 |
| 434 | ENSG00000148730 | EIF4EBP2  | 3 | 0.000105955 | 0.003167939 | 0.54 |
| 435 | ENSG00000088367 | EPB41L1   | 3 | 0.000105955 | 0.003167939 | 0.55 |
| 436 | ENSG00000109063 | MYH3      | 3 | 0.000105955 | 0.003167939 | 0.55 |
| 437 | ENSG00000164442 | CITED2    | 3 | 0.000105955 | 0.003167939 | 0.55 |
| 438 | ENSG00000164694 | FNDC1     | 3 | 0.000105955 | 0.003167939 | 0.55 |
| 439 | ENSG00000166343 | MSS51     | 3 | 0.000105955 | 0.003167939 | 0.55 |
| 440 | ENSG00000011454 | RABGAP1   | 3 | 0.000105955 | 0.003167939 | 0.56 |
| 441 | ENSG00000111674 | ENO2      | 3 | 0.000105955 | 0.003167939 | 0.56 |
| 442 | ENSG00000131634 | TMEM204   | 3 | 0.000105955 | 0.003167939 | 0.56 |
| 443 | ENSG00000105137 | SYDE1     | 3 | 0.000105955 | 0.003167939 | 0.57 |
| 444 | ENSG00000138050 | THUMPD2   | 3 | 0.000105955 | 0.003167939 | 0.57 |
| 445 | ENSG00000139266 | MARCHF9.  | 3 | 0.000105955 | 0.003167939 | 0.57 |
| 446 | ENSG00000149115 | TNKS1BP1  | 3 | 0.000105955 | 0.003167939 | 0.57 |
| 447 | ENSG00000084731 | KIF3C     | 3 | 0.000105955 | 0.003167939 | 0.58 |
| 448 | ENSG00000180447 | GAS1      | 3 | 0.000105955 | 0.003167939 | 0.58 |
| 449 | ENSG00000197043 | ANXA6     | 3 | 0.000105955 | 0.003167939 | 0.59 |
| 450 | ENSG00000131067 | GGT7      | 3 | 0.000105955 | 0.003167939 | 0.6  |
| 451 | ENSG00000159251 | ACTC1     | 3 | 0.000105955 | 0.003167939 | 0.6  |
| 452 | ENSG00000141736 | ERBB2     | 3 | 0.000105955 | 0.003167939 | 0.61 |
| 453 | ENSG00000164574 | GALNT10   | 3 | 0.000105955 | 0.003167939 | 0.61 |
| 454 | ENSG00000073910 | FRY       | 3 | 0.000105955 | 0.003167939 | 0.62 |
| 455 | ENSG00000109501 | WFS1      | 3 | 0.000105955 | 0.003167939 | 0.62 |
| 456 | ENSG00000143845 | ETNK2     | 3 | 0.000105955 | 0.003167939 | 0.62 |
| 457 | ENSG00000010610 | CD4       | 3 | 0.000105955 | 0.003167939 | 0.65 |
| 458 | ENSG00000244486 | SCARF2    | 3 | 0.000105955 | 0.003167939 | 0.65 |
| 459 | ENSG00000116954 | RRAGC     | 3 | 0.000105955 | 0.003167939 | 0.66 |
| 460 | ENSG00000121671 | CRY2      | 3 | 0.000105955 | 0.003167939 | 0.66 |
| 461 | ENSG00000140285 | FGF7      | 3 | 0.000105955 | 0.003167939 | 0.66 |
| 462 | ENSG00000235750 | KIAA0040  | 3 | 0.000105955 | 0.003167939 | 0.67 |
| 463 | ENSG00000074964 | ARHGEF10L | 3 | 0.000105955 | 0.003167939 | 0.68 |
| 464 | ENSG00000100139 | MICALL1   | 3 | 0.000105955 | 0.003167939 | 0.68 |
| 465 | ENSG00000101210 | EEF1A2    | 3 | 0.000105955 | 0.003167939 | 0.68 |
| 466 | ENSG00000159128 | IFNGR2    | 3 | 0.000105955 | 0.003167939 | 0.69 |
| 467 | ENSG00000163661 | PTX3      | 3 | 0.000105955 | 0.003167939 | 0.7  |

|     |                 |          |   |             |             |      |
|-----|-----------------|----------|---|-------------|-------------|------|
| 468 | ENSG00000080845 | DLGAP4   | 3 | 0.000105955 | 0.003167939 | 0.71 |
| 469 | ENSG00000136379 | ABHD17C  | 3 | 0.000105955 | 0.003167939 | 0.71 |
| 470 | ENSG00000162604 | TM2D1    | 3 | 0.000105955 | 0.003167939 | 0.71 |
| 471 | ENSG00000165409 | TSHR     | 3 | 0.000105955 | 0.003167939 | 0.73 |
| 472 | ENSG00000123096 | SSPN     | 3 | 0.000105955 | 0.003167939 | 0.76 |
| 473 | ENSG00000131196 | NFATC1   | 3 | 0.000105955 | 0.003167939 | 0.78 |
| 474 | ENSG00000071051 | NCK2     | 3 | 0.000105955 | 0.003167939 | 0.82 |
| 475 | ENSG00000101938 | CHRDL1   | 3 | 0.000105955 | 0.003167939 | 0.82 |
| 476 | ENSG00000055211 | GINM1    | 3 | 0.000105955 | 0.003167939 | 0.85 |
| 477 | ENSG00000204851 | PNMA8B   | 3 | 0.000105955 | 0.003167939 | 0.86 |
| 478 | ENSG00000173175 | ADCY5    | 3 | 0.000105955 | 0.003167939 | 0.91 |
| 479 | ENSG00000177169 | ULK1     | 3 | 0.000105955 | 0.003167939 | 0.91 |
| 480 | ENSG00000169122 | FAM110B  | 3 | 0.000105955 | 0.003167939 | 0.92 |
| 481 | ENSG00000163638 | ADAMTS9  | 3 | 0.000105955 | 0.003167939 | 0.97 |
| 482 | ENSG00000134202 | GSTM3    | 3 | 0.000105955 | 0.003167939 | 0.98 |
| 483 | ENSG00000138449 | SLC40A1  | 3 | 0.000105955 | 0.003167939 | 0.98 |
| 484 | ENSG00000067992 | PKD3     | 3 | 0.000105955 | 0.003167939 | 1.04 |
| 485 | ENSG00000105429 | MEGF8    | 3 | 0.000105955 | 0.003167939 | 1.04 |
| 486 | ENSG00000146267 | FAXC     | 3 | 0.000105955 | 0.003167939 | 1.06 |
| 487 | ENSG00000189164 | ZNF527   | 3 | 0.000105955 | 0.003167939 | 1.06 |
| 488 | ENSG00000183111 | ARHGEF37 | 3 | 0.000105955 | 0.003167939 | 1.12 |
| 489 | ENSG00000140044 | JDP2     | 3 | 0.000105955 | 0.003167939 | 1.13 |
| 490 | ENSG00000149451 | ADAM33   | 3 | 0.000105955 | 0.003167939 | 1.13 |
| 491 | ENSG00000167971 | CASKIN1  | 3 | 0.000105955 | 0.003167939 | 1.16 |
| 492 | ENSG00000205903 | ZNF316   | 3 | 0.000105955 | 0.003167939 | 1.21 |
| 493 | ENSG00000243646 | IL10RB   | 3 | 0.000105955 | 0.003167939 | 1.26 |
| 494 | ENSG00000159784 | FAM131B  | 3 | 0.000105955 | 0.003167939 | 1.31 |
| 495 | ENSG00000259330 | INAFM2   | 3 | 0.000105955 | 0.003167939 | 1.71 |
| 496 | ENSG00000117643 | MAN1C1   | 3 | 0.000105955 | 0.003167939 | 1.93 |
| 497 | ENSG00000077943 | ITGA8    | 3 | 0.000105955 | 0.003167939 | 2.01 |
| 498 | ENSG00000102349 | KLF8     | 3 | 0.000105955 | 0.003167939 | 2.97 |
| 499 | ENSG00000179344 | HLA-DQB1 | 3 | 0.000105955 | 0.003167939 | 3.63 |
| 500 | ENSG00000102181 | CD99L2   | 3 | 0.000105955 | 0.003167939 | 4.61 |
| 501 | ENSG00000015153 | YAF2     | 4 | 0.001065296 | 0.016909828 | 0    |
| 502 | ENSG00000037637 | FBXO42   | 4 | 0.001065296 | 0.016909828 | 0    |
| 503 | ENSG00000057935 | MTA3     | 4 | 0.001065296 | 0.016909828 | 0    |
| 504 | ENSG00000074590 | NUAK1    | 4 | 0.001065296 | 0.016909828 | 0    |
| 505 | ENSG00000082781 | ITGB5    | 4 | 0.001065296 | 0.016909828 | 0    |
| 506 | ENSG00000099949 | LZTR1    | 4 | 0.001065296 | 0.016909828 | 0    |
| 507 | ENSG00000102024 | PLS3     | 4 | 0.001065296 | 0.016909828 | 0    |
| 508 | ENSG00000102445 | RUBCNL   | 4 | 0.001065296 | 0.016909828 | 0    |
| 509 | ENSG00000103888 | CEMIP    | 4 | 0.001065296 | 0.016909828 | 0    |
| 510 | ENSG00000104047 | DTWD1    | 4 | 0.001065296 | 0.016909828 | 0    |
| 511 | ENSG00000107159 | CA9      | 4 | 0.001065296 | 0.016909828 | 0    |
| 512 | ENSG00000108239 | TBC1D12  | 4 | 0.001065296 | 0.016909828 | 0    |
| 513 | ENSG00000112210 | RAB23    | 4 | 0.001065296 | 0.016909828 | 0    |
| 514 | ENSG00000117859 | OSBPL9   | 4 | 0.001065296 | 0.016909828 | 0    |
| 515 | ENSG00000118705 | RPN2     | 4 | 0.001065296 | 0.016909828 | 0    |
| 516 | ENSG00000119630 | PGF      | 4 | 0.001065296 | 0.016909828 | 0    |
| 517 | ENSG00000120254 | MTHFD1L  | 4 | 0.001065296 | 0.016909828 | 0    |
| 518 | ENSG00000126561 | STAT5A   | 4 | 0.001065296 | 0.016909828 | 0    |
| 519 | ENSG00000129116 | PALLD    | 4 | 0.001065296 | 0.016909828 | 0    |
| 520 | ENSG00000149591 | TAGLN    | 4 | 0.001065296 | 0.016909828 | 0    |
| 521 | ENSG00000151778 | SERP2    | 4 | 0.001065296 | 0.016909828 | 0    |
| 522 | ENSG00000152894 | PTPRK    | 4 | 0.001065296 | 0.016909828 | 0    |
| 523 | ENSG00000154978 | VOPPI    | 4 | 0.001065296 | 0.016909828 | 0    |
| 524 | ENSG00000156026 | MCU      | 4 | 0.001065296 | 0.016909828 | 0    |
| 525 | ENSG00000159176 | CSRP1    | 4 | 0.001065296 | 0.016909828 | 0    |
| 526 | ENSG00000160255 | ITGB2    | 4 | 0.001065296 | 0.016909828 | 0    |
| 527 | ENSG00000198420 | TCAF1    | 4 | 0.001065296 | 0.016909828 | 0    |
| 528 | ENSG00000211455 | STK38L   | 4 | 0.001065296 | 0.016909828 | 0    |
| 529 | ENSG00000050165 | DKK3     | 4 | 0.001065296 | 0.016909828 | 0.01 |
| 530 | ENSG00000078902 | TOLLIP   | 4 | 0.001065296 | 0.016909828 | 0.01 |
| 531 | ENSG00000117519 | CNN3     | 4 | 0.001065296 | 0.016909828 | 0.01 |
| 532 | ENSG00000135956 | TMEM127  | 4 | 0.001065296 | 0.016909828 | 0.01 |
| 533 | ENSG00000185633 | NDUFA4L2 | 4 | 0.001065296 | 0.016909828 | 0.01 |
| 534 | ENSG00000065989 | n_a      | 4 | 0.001065296 | 0.016909828 | 0.02 |
| 535 | ENSG00000084652 | TXLNA    | 4 | 0.001065296 | 0.016909828 | 0.02 |
| 536 | ENSG00000090924 | PLEKHG2  | 4 | 0.001065296 | 0.016909828 | 0.02 |
| 537 | ENSG00000254726 | MEX3A    | 4 | 0.001065296 | 0.016909828 | 0.02 |
| 538 | ENSG00000046651 | OFD1     | 4 | 0.001065296 | 0.016909828 | 0.03 |
| 539 | ENSG00000101335 | MYL9     | 4 | 0.001065296 | 0.016909828 | 0.03 |
| 540 | ENSG00000107438 | PDLIM1   | 4 | 0.001065296 | 0.016909828 | 0.03 |
| 541 | ENSG00000116786 | PLEKHM2  | 4 | 0.001065296 | 0.016909828 | 0.03 |
| 542 | ENSG00000141447 | OSBPL1A  | 4 | 0.001065296 | 0.016909828 | 0.03 |
| 543 | ENSG00000163251 | FZD5     | 4 | 0.001065296 | 0.016909828 | 0.03 |
| 544 | ENSG00000168118 | RAB4A    | 4 | 0.001065296 | 0.016909828 | 0.03 |
| 545 | ENSG00000178776 | Scorf46  | 4 | 0.001065296 | 0.016909828 | 0.03 |
| 546 | ENSG00000205309 | NT5M     | 4 | 0.001065296 | 0.016909828 | 0.03 |
| 547 | ENSG00000205978 | NYNRIN   | 4 | 0.001065296 | 0.016909828 | 0.03 |
| 548 | ENSG00000214944 | ARHGEF28 | 4 | 0.001065296 | 0.016909828 | 0.03 |
| 549 | ENSG00000104870 | FCGRT    | 4 | 0.001065296 | 0.016909828 | 0.04 |
| 550 | ENSG00000107551 | RASSF4   | 4 | 0.001065296 | 0.016909828 | 0.04 |
| 551 | ENSG00000117139 | KDM5B    | 4 | 0.001065296 | 0.016909828 | 0.04 |
| 552 | ENSG00000118707 | TGIF2    | 4 | 0.001065296 | 0.016909828 | 0.04 |
| 553 | ENSG00000122367 | LDB3     | 4 | 0.001065296 | 0.016909828 | 0.04 |
| 554 | ENSG00000129625 | REEP5    | 4 | 0.001065296 | 0.016909828 | 0.04 |
| 555 | ENSG00000140577 | CRTC3    | 4 | 0.001065296 | 0.016909828 | 0.04 |
| 556 | ENSG00000143382 | ADAMTSL4 | 4 | 0.001065296 | 0.016909828 | 0.04 |
| 557 | ENSG00000160703 | NLRX1    | 4 | 0.001065296 | 0.016909828 | 0.04 |
| 558 | ENSG00000162614 | NEXN     | 4 | 0.001065296 | 0.016909828 | 0.04 |
| 559 | ENSG00000167107 | ACSF2    | 4 | 0.001065296 | 0.016909828 | 0.04 |
| 560 | ENSG00000175084 | DES      | 4 | 0.001065296 | 0.016909828 | 0.04 |
| 561 | ENSG00000060069 | CTDP1    | 4 | 0.001065296 | 0.016909828 | 0.05 |

|     |                 |          |   |             |             |      |
|-----|-----------------|----------|---|-------------|-------------|------|
| 562 | ENSG00000062716 | VMP1     | 4 | 0.001065296 | 0.016909828 | 0.05 |
| 563 | ENSG00000152601 | MBNL1    | 4 | 0.001065296 | 0.016909828 | 0.05 |
| 564 | ENSG00000154556 | SORBS2   | 4 | 0.001065296 | 0.016909828 | 0.05 |
| 565 | ENSG00000169515 | CCDC8    | 4 | 0.001065296 | 0.016909828 | 0.05 |
| 566 | ENSG00000187244 | BCAM     | 4 | 0.001065296 | 0.016909828 | 0.05 |
| 567 | ENSG00000142733 | MAP3K6   | 4 | 0.001065296 | 0.016909828 | 0.06 |
| 568 | ENSG00000151422 | FER      | 4 | 0.001065296 | 0.016909828 | 0.06 |
| 569 | ENSG00000188997 | KCTD21   | 4 | 0.001065296 | 0.016909828 | 0.06 |
| 570 | ENSG00000005379 | TSPOAP1  | 4 | 0.001065296 | 0.016909828 | 0.07 |
| 571 | ENSG00000101871 | MID1     | 4 | 0.001065296 | 0.016909828 | 0.07 |
| 572 | ENSG00000116128 | BCL9     | 4 | 0.001065296 | 0.016909828 | 0.07 |
| 573 | ENSG00000131668 | BARX1    | 4 | 0.001065296 | 0.016909828 | 0.07 |
| 574 | ENSG00000163815 | CLEC3B   | 4 | 0.001065296 | 0.016909828 | 0.07 |
| 575 | ENSG00000180340 | FZD2     | 4 | 0.001065296 | 0.016909828 | 0.07 |
| 576 | ENSG00000275074 | NUDT18   | 4 | 0.001065296 | 0.016909828 | 0.07 |
| 577 | ENSG00000104881 | PPP1R13L | 4 | 0.001065296 | 0.016909828 | 0.08 |
| 578 | ENSG00000143554 | SLC27A3  | 4 | 0.001065296 | 0.016909828 | 0.08 |
| 579 | ENSG00000155893 | PXYLP1   | 4 | 0.001065296 | 0.016909828 | 0.08 |
| 580 | ENSG00000157637 | SLC38A10 | 4 | 0.001065296 | 0.016909828 | 0.08 |
| 581 | ENSG00000116117 | PARD3B   | 4 | 0.001065296 | 0.016909828 | 0.09 |
| 582 | ENSG00000119318 | RAD23B   | 4 | 0.001065296 | 0.016909828 | 0.09 |
| 583 | ENSG00000168955 | TM4SF20  | 4 | 0.001065296 | 0.016909828 | 0.09 |
| 584 | ENSG00000170442 | KRT86    | 4 | 0.001065296 | 0.016909828 | 0.09 |
| 585 | ENSG00000004975 | DVL2     | 4 | 0.001065296 | 0.016909828 | 0.1  |
| 586 | ENSG00000012822 | CALCOCO1 | 4 | 0.001065296 | 0.016909828 | 0.1  |
| 587 | ENSG00000109625 | CPZ      | 4 | 0.001065296 | 0.016909828 | 0.1  |
| 588 | ENSG00000134363 | FST      | 4 | 0.001065296 | 0.016909828 | 0.1  |
| 589 | ENSG00000172638 | EFEMP2   | 4 | 0.001065296 | 0.016909828 | 0.1  |
| 590 | ENSG00000186205 | MARC1    | 4 | 0.001065296 | 0.016909828 | 0.1  |
| 591 | ENSG00000112658 | SRF      | 4 | 0.001065296 | 0.016909828 | 0.11 |
| 592 | ENSG00000235194 | PPP1R3E  | 4 | 0.001065296 | 0.016909828 | 0.11 |
| 593 | ENSG00000133142 | TCEAL4   | 4 | 0.001065296 | 0.016909828 | 0.12 |
| 594 | ENSG00000135205 | CCDC146  | 4 | 0.001065296 | 0.016909828 | 0.12 |
| 595 | ENSG00000181284 | TMEM102  | 4 | 0.001065296 | 0.016909828 | 0.12 |
| 596 | ENSG00000198467 | TPM2     | 4 | 0.001065296 | 0.016909828 | 0.12 |
| 597 | ENSG00000012660 | ELOVL5   | 4 | 0.001065296 | 0.016909828 | 0.13 |
| 598 | ENSG00000122203 | KIAA1191 | 4 | 0.001065296 | 0.016909828 | 0.13 |
| 599 | ENSG00000150347 | ARID5B   | 4 | 0.001065296 | 0.016909828 | 0.13 |
| 600 | ENSG00000167123 | CERCAM   | 4 | 0.001065296 | 0.016909828 | 0.13 |
| 601 | ENSG00000083290 | ULK2     | 4 | 0.001065296 | 0.016909828 | 0.14 |
| 602 | ENSG00000148848 | ADAM12   | 4 | 0.001065296 | 0.016909828 | 0.14 |
| 603 | ENSG00000089351 | GRAMD1A  | 4 | 0.001065296 | 0.016909828 | 0.15 |
| 604 | ENSG00000107816 | LZTS2    | 4 | 0.001065296 | 0.016909828 | 0.15 |
| 605 | ENSG00000121413 | ZSCAN18  | 4 | 0.001065296 | 0.016909828 | 0.15 |
| 606 | ENSG00000138759 | FRAS1    | 4 | 0.001065296 | 0.016909828 | 0.15 |
| 607 | ENSG00000160094 | ZNF362   | 4 | 0.001065296 | 0.016909828 | 0.15 |
| 608 | ENSG00000261150 | EPPK1    | 4 | 0.001065296 | 0.016909828 | 0.15 |
| 609 | ENSG00000163521 | GLB1L    | 4 | 0.001065296 | 0.016909828 | 0.16 |
| 610 | ENSG00000177565 | TBL1XR1  | 4 | 0.001065296 | 0.016909828 | 0.16 |
| 611 | ENSG00000180155 | LYNX1    | 4 | 0.001065296 | 0.016909828 | 0.16 |
| 612 | ENSG00000182923 | CEP63    | 4 | 0.001065296 | 0.016909828 | 0.16 |
| 613 | ENSG00000106327 | TFR2     | 4 | 0.001065296 | 0.016909828 | 0.17 |
| 614 | ENSG00000135622 | SEMA4F   | 4 | 0.001065296 | 0.016909828 | 0.17 |
| 615 | ENSG00000143379 | SETDB1   | 4 | 0.001065296 | 0.016909828 | 0.17 |
| 616 | ENSG00000151743 | AMN1     | 4 | 0.001065296 | 0.016909828 | 0.17 |
| 617 | ENSG00000157833 | GAREM2   | 4 | 0.001065296 | 0.016909828 | 0.17 |
| 618 | ENSG00000162704 | ARPC5    | 4 | 0.001065296 | 0.016909828 | 0.17 |
| 619 | ENSG00000166710 | B2M      | 4 | 0.001065296 | 0.016909828 | 0.17 |
| 620 | ENSG00000175309 | PHYKPL   | 4 | 0.001065296 | 0.016909828 | 0.17 |
| 621 | ENSG00000108861 | DUSP3    | 4 | 0.001065296 | 0.016909828 | 0.18 |
| 622 | ENSG00000137103 | TMEM8B   | 4 | 0.001065296 | 0.016909828 | 0.18 |
| 623 | ENSG00000165152 | TMEM246  | 4 | 0.001065296 | 0.016909828 | 0.18 |
| 624 | ENSG00000172667 | ZMAT3    | 4 | 0.001065296 | 0.016909828 | 0.18 |
| 625 | ENSG00000275993 | SIK1B    | 4 | 0.001065296 | 0.016909828 | 0.18 |
| 626 | ENSG00000074657 | ZNF532   | 4 | 0.001065296 | 0.016909828 | 0.19 |
| 627 | ENSG00000077684 | JADE1    | 4 | 0.001065296 | 0.016909828 | 0.19 |
| 628 | ENSG00000112679 | DUSP22   | 4 | 0.001065296 | 0.016909828 | 0.19 |
| 629 | ENSG00000122707 | RECK     | 4 | 0.001065296 | 0.016909828 | 0.19 |
| 630 | ENSG00000124067 | SLC12A4  | 4 | 0.001065296 | 0.016909828 | 0.19 |
| 631 | ENSG00000170004 | CHD3     | 4 | 0.001065296 | 0.016909828 | 0.19 |
| 632 | ENSG00000174306 | ZHX3     | 4 | 0.001065296 | 0.016909828 | 0.19 |
| 633 | ENSG00000175727 | MLXIP    | 4 | 0.001065296 | 0.016909828 | 0.19 |
| 634 | ENSG00000182916 | TCEAL7   | 4 | 0.001065296 | 0.016909828 | 0.19 |
| 635 | ENSG00000184635 | ZNF93    | 4 | 0.001065296 | 0.016909828 | 0.19 |
| 636 | ENSG00000054793 | ATP9A    | 4 | 0.001065296 | 0.016909828 | 0.2  |
| 637 | ENSG00000100376 | FAM118A  | 4 | 0.001065296 | 0.016909828 | 0.2  |
| 638 | ENSG00000150051 | MKX      | 4 | 0.001065296 | 0.016909828 | 0.2  |
| 639 | ENSG00000153048 | CARHSP1  | 4 | 0.001065296 | 0.016909828 | 0.2  |
| 640 | ENSG00000179954 | SSC5D    | 4 | 0.001065296 | 0.016909828 | 0.2  |
| 641 | ENSG00000188783 | PRELP    | 4 | 0.001065296 | 0.016909828 | 0.2  |
| 642 | ENSG00000071073 | MGAT4A   | 4 | 0.001065296 | 0.016909828 | 0.21 |
| 643 | ENSG00000091972 | CD200    | 4 | 0.001065296 | 0.016909828 | 0.21 |
| 644 | ENSG00000125648 | SLC25A23 | 4 | 0.001065296 | 0.016909828 | 0.21 |
| 645 | ENSG00000131370 | SH3BP5   | 4 | 0.001065296 | 0.016909828 | 0.21 |
| 646 | ENSG00000145916 | RHND5B   | 4 | 0.001065296 | 0.016909828 | 0.21 |
| 647 | ENSG00000153885 | KCTD15   | 4 | 0.001065296 | 0.016909828 | 0.21 |
| 648 | ENSG00000076344 | RGS11    | 4 | 0.001065296 | 0.016909828 | 0.22 |
| 649 | ENSG00000107679 | PLEKHA1  | 4 | 0.001065296 | 0.016909828 | 0.22 |
| 650 | ENSG00000111276 | CDKN1B   | 4 | 0.001065296 | 0.016909828 | 0.22 |
| 651 | ENSG00000143437 | ARNT     | 4 | 0.001065296 | 0.016909828 | 0.22 |
| 652 | ENSG00000163378 | EOGT     | 4 | 0.001065296 | 0.016909828 | 0.22 |
| 653 | ENSG00000171385 | KCND3    | 4 | 0.001065296 | 0.016909828 | 0.22 |
| 654 | ENSG00000172673 | THEMIS   | 4 | 0.001065296 | 0.016909828 | 0.22 |
| 655 | ENSG00000196588 | MRTFA    | 4 | 0.001065296 | 0.016909828 | 0.22 |

|     |                 |                  |   |             |             |      |
|-----|-----------------|------------------|---|-------------|-------------|------|
| 656 | ENSG00000103742 | <i>IGDCC4</i>    | 4 | 0.001065296 | 0.016909828 | 0.23 |
| 657 | ENSG00000107745 | <i>MICU1</i>     | 4 | 0.001065296 | 0.016909828 | 0.23 |
| 658 | ENSG00000121104 | <i>FAM117A</i>   | 4 | 0.001065296 | 0.016909828 | 0.23 |
| 659 | ENSG00000128268 | <i>MGAT3</i>     | 4 | 0.001065296 | 0.016909828 | 0.23 |
| 660 | ENSG00000143590 | <i>EFNA3</i>     | 4 | 0.001065296 | 0.016909828 | 0.23 |
| 661 | ENSG00000151640 | <i>DPYSL4</i>    | 4 | 0.001065296 | 0.016909828 | 0.23 |
| 662 | ENSG00000136378 | <i>ADAMTS7</i>   | 4 | 0.001065296 | 0.016909828 | 0.24 |
| 663 | ENSG00000140931 | <i>CMTM3</i>     | 4 | 0.001065296 | 0.016909828 | 0.24 |
| 664 | ENSG00000166313 | <i>APBB1</i>     | 4 | 0.001065296 | 0.016909828 | 0.24 |
| 665 | ENSG00000025039 | <i>RRAGD</i>     | 4 | 0.001065296 | 0.016909828 | 0.25 |
| 666 | ENSG00000135924 | <i>DNAJB2</i>    | 4 | 0.001065296 | 0.016909828 | 0.25 |
| 667 | ENSG00000137142 | <i>IGFBPL1</i>   | 4 | 0.001065296 | 0.016909828 | 0.25 |
| 668 | ENSG00000143217 | <i>NECTIN4</i>   | 4 | 0.001065296 | 0.016909828 | 0.25 |
| 669 | ENSG00000170390 | <i>DCLK2</i>     | 4 | 0.001065296 | 0.016909828 | 0.25 |
| 670 | ENSG00000176720 | <i>BOK</i>       | 4 | 0.001065296 | 0.016909828 | 0.25 |
| 671 | ENSG00000132321 | <i>IQCA1</i>     | 4 | 0.001065296 | 0.016909828 | 0.26 |
| 672 | ENSG00000155324 | <i>GRAMD2B</i>   | 4 | 0.001065296 | 0.016909828 | 0.26 |
| 673 | ENSG00000166311 | <i>SMPD1</i>     | 4 | 0.001065296 | 0.016909828 | 0.26 |
| 674 | ENSG00000183578 | <i>TNFAIP8L3</i> | 4 | 0.001065296 | 0.016909828 | 0.26 |
| 675 | ENSG00000185100 | <i>ADSSL1</i>    | 4 | 0.001065296 | 0.016909828 | 0.26 |
| 676 | ENSG00000078725 | <i>BRINP1</i>    | 4 | 0.001065296 | 0.016909828 | 0.27 |
| 677 | ENSG00000117020 | <i>AKT3</i>      | 4 | 0.001065296 | 0.016909828 | 0.27 |
| 678 | ENSG00000125744 | <i>RTN2</i>      | 4 | 0.001065296 | 0.016909828 | 0.27 |
| 679 | ENSG00000171475 | <i>WIPF2</i>     | 4 | 0.001065296 | 0.016909828 | 0.27 |
| 680 | ENSG00000174516 | <i>PEL13</i>     | 4 | 0.001065296 | 0.016909828 | 0.28 |
| 681 | ENSG00000179841 | <i>AKAP5</i>     | 4 | 0.001065296 | 0.016909828 | 0.28 |
| 682 | ENSG00000182919 | <i>C11orf54</i>  | 4 | 0.001065296 | 0.016909828 | 0.28 |
| 683 | ENSG00000196867 | <i>ZFP28</i>     | 4 | 0.001065296 | 0.016909828 | 0.28 |
| 684 | ENSG00000139597 | <i>N4BP2L1</i>   | 4 | 0.001065296 | 0.016909828 | 0.29 |
| 685 | ENSG00000149823 | <i>VPS51</i>     | 4 | 0.001065296 | 0.016909828 | 0.29 |
| 686 | ENSG00000152137 | <i>HSPB8</i>     | 4 | 0.001065296 | 0.016909828 | 0.29 |
| 687 | ENSG00000167771 | <i>RCOR2</i>     | 4 | 0.001065296 | 0.016909828 | 0.29 |
| 688 | ENSG00000183722 | <i>LHFPL6</i>    | 4 | 0.001065296 | 0.016909828 | 0.29 |
| 689 | ENSG00000223953 | <i>C1QTNF5</i>   | 4 | 0.001065296 | 0.016909828 | 0.29 |
| 690 | ENSG00000240849 | <i>TMEM189</i>   | 4 | 0.001065296 | 0.016909828 | 0.29 |
| 691 | ENSG00000277443 | <i>MARCKS</i>    | 4 | 0.001065296 | 0.016909828 | 0.29 |
| 692 | ENSG00000109099 | <i>PMP22</i>     | 4 | 0.001065296 | 0.016909828 | 0.3  |
| 693 | ENSG00000109458 | <i>GAB1</i>      | 4 | 0.001065296 | 0.016909828 | 0.3  |
| 694 | ENSG00000114023 | <i>FAM162A</i>   | 4 | 0.001065296 | 0.016909828 | 0.3  |
| 695 | ENSG00000119408 | <i>NEK6</i>      | 4 | 0.001065296 | 0.016909828 | 0.3  |
| 696 | ENSG00000151882 | <i>CCL28</i>     | 4 | 0.001065296 | 0.016909828 | 0.3  |
| 697 | ENSG00000164086 | <i>DUSP7</i>     | 4 | 0.001065296 | 0.016909828 | 0.3  |
| 698 | ENSG00000170464 | <i>DNAJC18</i>   | 4 | 0.001065296 | 0.016909828 | 0.3  |
| 699 | ENSG00000172663 | <i>TMEM134</i>   | 4 | 0.001065296 | 0.016909828 | 0.3  |
| 700 | ENSG00000176723 | <i>ZNF843</i>    | 4 | 0.001065296 | 0.016909828 | 0.3  |
| 701 | ENSG00000183691 | <i>NOG</i>       | 4 | 0.001065296 | 0.016909828 | 0.3  |
| 702 | ENSG00000198894 | <i>CIPC</i>      | 4 | 0.001065296 | 0.016909828 | 0.3  |
| 703 | ENSG00000077942 | <i>BLN1</i>      | 4 | 0.001065296 | 0.016909828 | 0.31 |
| 704 | ENSG00000099308 | <i>MAST3</i>     | 4 | 0.001065296 | 0.016909828 | 0.31 |
| 705 | ENSG00000134594 | <i>RAB33A</i>    | 4 | 0.001065296 | 0.016909828 | 0.31 |
| 706 | ENSG00000162522 | <i>KIAA1522</i>  | 4 | 0.001065296 | 0.016909828 | 0.31 |
| 707 | ENSG00000164309 | <i>CMYA5</i>     | 4 | 0.001065296 | 0.016909828 | 0.31 |
| 708 | ENSG00000127334 | <i>DYRK2</i>     | 4 | 0.001065296 | 0.016909828 | 0.32 |
| 709 | ENSG00000128655 | <i>PDE11A</i>    | 4 | 0.001065296 | 0.016909828 | 0.32 |
| 710 | ENSG00000155792 | <i>DEPTOR</i>    | 4 | 0.001065296 | 0.016909828 | 0.32 |
| 711 | ENSG00000169282 | <i>KCNAB1</i>    | 4 | 0.001065296 | 0.016909828 | 0.32 |
| 712 | ENSG00000169992 | <i>NLGN2</i>     | 4 | 0.001065296 | 0.016909828 | 0.32 |
| 713 | ENSG00000174282 | <i>ZBTB4</i>     | 4 | 0.001065296 | 0.016909828 | 0.32 |
| 714 | ENSG00000175356 | <i>SCUBE2</i>    | 4 | 0.001065296 | 0.016909828 | 0.32 |
| 715 | ENSG00000011028 | <i>n_a</i>       | 4 | 0.001065296 | 0.016909828 | 0.33 |
| 716 | ENSG00000107341 | <i>UBE2R2</i>    | 4 | 0.001065296 | 0.016909828 | 0.33 |
| 717 | ENSG00000137801 | <i>THBS1</i>     | 4 | 0.001065296 | 0.016909828 | 0.33 |
| 718 | ENSG00000146122 | <i>DAAM2</i>     | 4 | 0.001065296 | 0.016909828 | 0.33 |
| 719 | ENSG00000158050 | <i>DUSP2</i>     | 4 | 0.001065296 | 0.016909828 | 0.33 |
| 720 | ENSG00000171953 | <i>ATPAF2</i>    | 4 | 0.001065296 | 0.016909828 | 0.33 |
| 721 | ENSG00000124098 | <i>FAM210B</i>   | 4 | 0.001065296 | 0.016909828 | 0.34 |
| 722 | ENSG00000160999 | <i>SH2B2</i>     | 4 | 0.001065296 | 0.016909828 | 0.34 |
| 723 | ENSG00000185338 | <i>SOCS1</i>     | 4 | 0.001065296 | 0.016909828 | 0.34 |
| 724 | ENSG00000243244 | <i>STON1</i>     | 4 | 0.001065296 | 0.016909828 | 0.34 |
| 725 | ENSG00000075624 | <i>ACTB</i>      | 4 | 0.001065296 | 0.016909828 | 0.35 |
| 726 | ENSG00000088543 | <i>C3orf18</i>   | 4 | 0.001065296 | 0.016909828 | 0.35 |
| 727 | ENSG00000114923 | <i>SLC4A3</i>    | 4 | 0.001065296 | 0.016909828 | 0.35 |
| 728 | ENSG00000137409 | <i>MTCH1</i>     | 4 | 0.001065296 | 0.016909828 | 0.35 |
| 729 | ENSG00000152154 | <i>TMEM178A</i>  | 4 | 0.001065296 | 0.016909828 | 0.35 |
| 730 | ENSG00000162104 | <i>ADCY9</i>     | 4 | 0.001065296 | 0.016909828 | 0.35 |
| 731 | ENSG00000133935 | <i>ERG28</i>     | 4 | 0.001065296 | 0.016909828 | 0.36 |
| 732 | ENSG00000137070 | <i>IL11RA</i>    | 4 | 0.001065296 | 0.016909828 | 0.36 |
| 733 | ENSG00000185567 | <i>AHNAK2</i>    | 4 | 0.001065296 | 0.016909828 | 0.36 |
| 734 | ENSG00000203780 | <i>FANK1</i>     | 4 | 0.001065296 | 0.016909828 | 0.36 |
| 735 | ENSG00000134824 | <i>FADS4</i>     | 4 | 0.001065296 | 0.016909828 | 0.37 |
| 736 | ENSG00000160460 | <i>SPTBN4</i>    | 4 | 0.001065296 | 0.016909828 | 0.37 |
| 737 | ENSG00000214402 | <i>LCNL1</i>     | 4 | 0.001065296 | 0.016909828 | 0.37 |
| 738 | ENSG00000113269 | <i>RNF130</i>    | 4 | 0.001065296 | 0.016909828 | 0.38 |
| 739 | ENSG00000114646 | <i>CSPG5</i>     | 4 | 0.001065296 | 0.016909828 | 0.38 |
| 740 | ENSG00000160161 | <i>CILP2</i>     | 4 | 0.001065296 | 0.016909828 | 0.38 |
| 741 | ENSG00000164105 | <i>SAP30</i>     | 4 | 0.001065296 | 0.016909828 | 0.38 |
| 742 | ENSG00000174807 | <i>CD248</i>     | 4 | 0.001065296 | 0.016909828 | 0.38 |
| 743 | ENSG00000235863 | <i>B3GALT4</i>   | 4 | 0.001065296 | 0.016909828 | 0.38 |
| 744 | ENSG00000114450 | <i>GNB4</i>      | 4 | 0.001065296 | 0.016909828 | 0.39 |
| 745 | ENSG00000121753 | <i>ADGRB2</i>    | 4 | 0.001065296 | 0.016909828 | 0.39 |
| 746 | ENSG00000132510 | <i>KDM6B</i>     | 4 | 0.001065296 | 0.016909828 | 0.39 |
| 747 | ENSG00000166444 | <i>ST5</i>       | 4 | 0.001065296 | 0.016909828 | 0.39 |
| 748 | ENSG00000167552 | <i>TUBA1A</i>    | 4 | 0.001065296 | 0.016909828 | 0.39 |
| 749 | ENSG00000173442 | <i>EHBP1L1</i>   | 4 | 0.001065296 | 0.016909828 | 0.39 |



|     |                 |                  |   |             |             |      |
|-----|-----------------|------------------|---|-------------|-------------|------|
| 750 | ENSG00000178752 | <i>ERFE</i>      | 4 | 0.001065296 | 0.016909828 | 0.39 |
| 751 | ENSG00000100201 | <i>DDX17</i>     | 4 | 0.001065296 | 0.016909828 | 0.4  |
| 752 | ENSG00000115738 | <i>ID2</i>       | 4 | 0.001065296 | 0.016909828 | 0.4  |
| 753 | ENSG00000127663 | <i>KDM4B</i>     | 4 | 0.001065296 | 0.016909828 | 0.4  |
| 754 | ENSG00000198837 | <i>DENND4B</i>   | 4 | 0.001065296 | 0.016909828 | 0.4  |
| 755 | ENSG00000105270 | <i>CLIP3</i>     | 4 | 0.001065296 | 0.016909828 | 0.41 |
| 756 | ENSG00000151376 | <i>ME3</i>       | 4 | 0.001065296 | 0.016909828 | 0.41 |
| 757 | ENSG00000160013 | <i>PTGIR</i>     | 4 | 0.001065296 | 0.016909828 | 0.41 |
| 758 | ENSG00000161921 | <i>CXCL16</i>    | 4 | 0.001065296 | 0.016909828 | 0.41 |
| 759 | ENSG00000166997 | <i>CNPY4</i>     | 4 | 0.001065296 | 0.016909828 | 0.41 |
| 760 | ENSG00000186792 | <i>HYAL3</i>     | 4 | 0.001065296 | 0.016909828 | 0.41 |
| 761 | ENSG00000219607 | <i>PPP1R3G</i>   | 4 | 0.001065296 | 0.016909828 | 0.41 |
| 762 | ENSG00000131943 | <i>C19orf12</i>  | 4 | 0.001065296 | 0.016909828 | 0.42 |
| 763 | ENSG00000143850 | <i>PLEKHA6</i>   | 4 | 0.001065296 | 0.016909828 | 0.42 |
| 764 | ENSG00000050327 | <i>ARHGEF5</i>   | 4 | 0.001065296 | 0.016909828 | 0.43 |
| 765 | ENSG00000072422 | <i>RHOBTB1</i>   | 4 | 0.001065296 | 0.016909828 | 0.43 |
| 766 | ENSG00000119801 | <i>YPEL5</i>     | 4 | 0.001065296 | 0.016909828 | 0.43 |
| 767 | ENSG00000133048 | <i>CHI3L1</i>    | 4 | 0.001065296 | 0.016909828 | 0.43 |
| 768 | ENSG00000165617 | <i>DACT1</i>     | 4 | 0.001065296 | 0.016909828 | 0.43 |
| 769 | ENSG00000168256 | <i>NKIRAS2</i>   | 4 | 0.001065296 | 0.016909828 | 0.43 |
| 770 | ENSG00000168264 | <i>IRF2BP2</i>   | 4 | 0.001065296 | 0.016909828 | 0.43 |
| 771 | ENSG00000095739 | <i>BAMBI</i>     | 4 | 0.001065296 | 0.016909828 | 0.44 |
| 772 | ENSG00000100842 | <i>EFS</i>       | 4 | 0.001065296 | 0.016909828 | 0.44 |
| 773 | ENSG00000105223 | <i>PLD3</i>      | 4 | 0.001065296 | 0.016909828 | 0.44 |
| 774 | ENSG00000109103 | <i>UNC119</i>    | 4 | 0.001065296 | 0.016909828 | 0.44 |
| 775 | ENSG00000113456 | <i>RAD1</i>      | 4 | 0.001065296 | 0.016909828 | 0.44 |
| 776 | ENSG00000143434 | <i>SEMA6C</i>    | 4 | 0.001065296 | 0.016909828 | 0.44 |
| 777 | ENSG00000146373 | <i>RNF217</i>    | 4 | 0.001065296 | 0.016909828 | 0.44 |
| 778 | ENSG00000147912 | <i>FBXO10</i>    | 4 | 0.001065296 | 0.016909828 | 0.44 |
| 779 | ENSG00000166923 | <i>GREM1</i>     | 4 | 0.001065296 | 0.016909828 | 0.44 |
| 780 | ENSG00000004455 | <i>AK2</i>       | 4 | 0.001065296 | 0.016909828 | 0.45 |
| 781 | ENSG00000021762 | <i>OSBPL5</i>    | 4 | 0.001065296 | 0.016909828 | 0.45 |
| 782 | ENSG00000118960 | <i>HS1BP3</i>    | 4 | 0.001065296 | 0.016909828 | 0.45 |
| 783 | ENSG00000125247 | <i>TMTC4</i>     | 4 | 0.001065296 | 0.016909828 | 0.45 |
| 784 | ENSG00000127328 | <i>RAB3IP</i>    | 4 | 0.001065296 | 0.016909828 | 0.45 |
| 785 | ENSG00000130304 | <i>SLC27A1</i>   | 4 | 0.001065296 | 0.016909828 | 0.45 |
| 786 | ENSG00000162627 | <i>SNX7</i>      | 4 | 0.001065296 | 0.016909828 | 0.45 |
| 787 | ENSG00000166484 | <i>MAPK7</i>     | 4 | 0.001065296 | 0.016909828 | 0.45 |
| 788 | ENSG00000105419 | <i>MEIS3</i>     | 4 | 0.001065296 | 0.016909828 | 0.46 |
| 789 | ENSG00000133874 | <i>RNF122</i>    | 4 | 0.001065296 | 0.016909828 | 0.46 |
| 790 | ENSG00000138336 | <i>TE11</i>      | 4 | 0.001065296 | 0.016909828 | 0.46 |
| 791 | ENSG00000181027 | <i>FKRP</i>      | 4 | 0.001065296 | 0.016909828 | 0.46 |
| 792 | ENSG00000076706 | <i>n_a</i>       | 4 | 0.001065296 | 0.016909828 | 0.47 |
| 793 | ENSG00000100380 | <i>ST13</i>      | 4 | 0.001065296 | 0.016909828 | 0.47 |
| 794 | ENSG00000158863 | <i>FAM160B2</i>  | 4 | 0.001065296 | 0.016909828 | 0.47 |
| 795 | ENSG00000186111 | <i>PIP5K1C</i>   | 4 | 0.001065296 | 0.016909828 | 0.47 |
| 796 | ENSG00000196704 | <i>AMZ2</i>      | 4 | 0.001065296 | 0.016909828 | 0.47 |
| 797 | ENSG00000204632 | <i>HLA-G</i>     | 4 | 0.001065296 | 0.016909828 | 0.47 |
| 798 | ENSG00000169105 | <i>CHST14</i>    | 4 | 0.001065296 | 0.016909828 | 0.48 |
| 799 | ENSG00000118816 | <i>CCNI</i>      | 4 | 0.001065296 | 0.016909828 | 0.49 |
| 800 | ENSG00000135362 | <i>PRR5L</i>     | 4 | 0.001065296 | 0.016909828 | 0.49 |
| 801 | ENSG00000146592 | <i>CREB5</i>     | 4 | 0.001065296 | 0.016909828 | 0.49 |
| 802 | ENSG00000174080 | <i>CTSF</i>      | 4 | 0.001065296 | 0.016909828 | 0.49 |
| 803 | ENSG00000270885 | <i>RASL10B</i>   | 4 | 0.001065296 | 0.016909828 | 0.49 |
| 804 | ENSG00000169071 | <i>ROR2</i>      | 4 | 0.001065296 | 0.016909828 | 0.5  |
| 805 | ENSG00000185950 | <i>IRS2</i>      | 4 | 0.001065296 | 0.016909828 | 0.5  |
| 806 | ENSG00000227051 | <i>C14orf132</i> | 4 | 0.001065296 | 0.016909828 | 0.5  |
| 807 | ENSG00000049769 | <i>PPP1R3F</i>   | 4 | 0.001065296 | 0.016909828 | 0.51 |
| 808 | ENSG00000108389 | <i>MTMR4</i>     | 4 | 0.001065296 | 0.016909828 | 0.51 |
| 809 | ENSG00000167549 | <i>CORO6</i>     | 4 | 0.001065296 | 0.016909828 | 0.51 |
| 810 | ENSG00000184271 | <i>n_a</i>       | 4 | 0.001065296 | 0.016909828 | 0.51 |
| 811 | ENSG00000108950 | <i>FAM20A</i>    | 4 | 0.001065296 | 0.016909828 | 0.52 |
| 812 | ENSG00000112559 | <i>MDFI</i>      | 4 | 0.001065296 | 0.016909828 | 0.52 |
| 813 | ENSG00000167191 | <i>GPRC5B</i>    | 4 | 0.001065296 | 0.016909828 | 0.52 |
| 814 | ENSG00000170581 | <i>STAT2</i>     | 4 | 0.001065296 | 0.016909828 | 0.52 |
| 815 | ENSG00000131446 | <i>MGAT1</i>     | 4 | 0.001065296 | 0.016909828 | 0.53 |
| 816 | ENSG00000158828 | <i>PINK1</i>     | 4 | 0.001065296 | 0.016909828 | 0.53 |
| 817 | ENSG00000198863 | <i>RUNDC1</i>    | 4 | 0.001065296 | 0.016909828 | 0.53 |
| 818 | ENSG00000113328 | <i>CCNG1</i>     | 4 | 0.001065296 | 0.016909828 | 0.54 |
| 819 | ENSG00000197971 | <i>MBP</i>       | 4 | 0.001065296 | 0.016909828 | 0.54 |
| 820 | ENSG00000142065 | <i>ZFP14</i>     | 4 | 0.001065296 | 0.016909828 | 0.55 |
| 821 | ENSG00000151320 | <i>AKAP6</i>     | 4 | 0.001065296 | 0.016909828 | 0.55 |
| 822 | ENSG00000196605 | <i>ZNF846</i>    | 4 | 0.001065296 | 0.016909828 | 0.55 |
| 823 | ENSG00000204219 | <i>TCEA3</i>     | 4 | 0.001065296 | 0.016909828 | 0.55 |
| 824 | ENSG00000062038 | <i>CDH3</i>      | 4 | 0.001065296 | 0.016909828 | 0.56 |
| 825 | ENSG00000100968 | <i>NFATC4</i>    | 4 | 0.001065296 | 0.016909828 | 0.56 |
| 826 | ENSG00000133026 | <i>MYH10</i>     | 4 | 0.001065296 | 0.016909828 | 0.56 |
| 827 | ENSG00000137075 | <i>RNF38</i>     | 4 | 0.001065296 | 0.016909828 | 0.56 |
| 828 | ENSG00000149201 | <i>CCDC81</i>    | 4 | 0.001065296 | 0.016909828 | 0.56 |
| 829 | ENSG00000166482 | <i>MFAP4</i>     | 4 | 0.001065296 | 0.016909828 | 0.56 |
| 830 | ENSG00000046653 | <i>GPM6B</i>     | 4 | 0.001065296 | 0.016909828 | 0.57 |
| 831 | ENSG00000100321 | <i>SYNGR1</i>    | 4 | 0.001065296 | 0.016909828 | 0.57 |
| 832 | ENSG00000144746 | <i>ARL6IP5</i>   | 4 | 0.001065296 | 0.016909828 | 0.57 |
| 833 | ENSG00000196275 | <i>GF2IRD2</i>   | 4 | 0.001065296 | 0.016909828 | 0.57 |
| 834 | ENSG00000206527 | <i>HACD2</i>     | 4 | 0.001065296 | 0.016909828 | 0.57 |
| 835 | ENSG00000104343 | <i>UBE2W</i>     | 4 | 0.001065296 | 0.016909828 | 0.58 |
| 836 | ENSG00000111052 | <i>LIN7A</i>     | 4 | 0.001065296 | 0.016909828 | 0.58 |
| 837 | ENSG00000140939 | <i>n_a</i>       | 4 | 0.001065296 | 0.016909828 | 0.58 |
| 838 | ENSG00000241852 | <i>C8orf58</i>   | 4 | 0.001065296 | 0.016909828 | 0.58 |
| 839 | ENSG00000065491 | <i>TBC1D22B</i>  | 4 | 0.001065296 | 0.016909828 | 0.6  |
| 840 | ENSG00000110881 | <i>ASIC1</i>     | 4 | 0.001065296 | 0.016909828 | 0.6  |
| 841 | ENSG00000178033 | <i>CALHM5</i>    | 4 | 0.001065296 | 0.016909828 | 0.6  |
| 842 | ENSG00000129250 | <i>KIF1C</i>     | 4 | 0.001065296 | 0.016909828 | 0.61 |
| 843 | ENSG00000146233 | <i>CYP39A1</i>   | 4 | 0.001065296 | 0.016909828 | 0.62 |

|     |                 |                  |   |             |             |      |
|-----|-----------------|------------------|---|-------------|-------------|------|
| 844 | ENSG00000184206 | <i>GOLGA6L4</i>  | 4 | 0.001065296 | 0.016909828 | 0.62 |
| 845 | ENSG00000139182 | <i>CLSTN3</i>    | 4 | 0.001065296 | 0.016909828 | 0.63 |
| 846 | ENSG00000173898 | <i>SPTBN2</i>    | 4 | 0.001065296 | 0.016909828 | 0.63 |
| 847 | ENSG00000117266 | <i>CDK18</i>     | 4 | 0.001065296 | 0.016909828 | 0.64 |
| 848 | ENSG00000139200 | <i>PIANP</i>     | 4 | 0.001065296 | 0.016909828 | 0.64 |
| 849 | ENSG00000172765 | <i>TMCC1</i>     | 4 | 0.001065296 | 0.016909828 | 0.64 |
| 850 | ENSG00000143847 | <i>PPFIA4</i>    | 4 | 0.001065296 | 0.016909828 | 0.65 |
| 851 | ENSG00000204525 | <i>HLA-C</i>     | 4 | 0.001065296 | 0.016909828 | 0.65 |
| 852 | ENSG00000144810 | <i>COL8A1</i>    | 4 | 0.001065296 | 0.016909828 | 0.66 |
| 853 | ENSG00000182054 | <i>IDH2</i>      | 4 | 0.001065296 | 0.016909828 | 0.66 |
| 854 | ENSG00000161904 | <i>LEMD2</i>     | 4 | 0.001065296 | 0.016909828 | 0.67 |
| 855 | ENSG00000188811 | <i>NHLRC3</i>    | 4 | 0.001065296 | 0.016909828 | 0.67 |
| 856 | ENSG00000112367 | <i>FIG4</i>      | 4 | 0.001065296 | 0.016909828 | 0.68 |
| 857 | ENSG00000036672 | <i>USP2</i>      | 4 | 0.001065296 | 0.016909828 | 0.69 |
| 858 | ENSG00000092295 | <i>TGM1</i>      | 4 | 0.001065296 | 0.016909828 | 0.69 |
| 859 | ENSG00000129467 | <i>ADCY4</i>     | 4 | 0.001065296 | 0.016909828 | 0.69 |
| 860 | ENSG00000173548 | <i>SNX33</i>     | 4 | 0.001065296 | 0.016909828 | 0.69 |
| 861 | ENSG00000197702 | <i>PARVA</i>     | 4 | 0.001065296 | 0.016909828 | 0.69 |
| 862 | ENSG00000213722 | <i>DDAH2</i>     | 4 | 0.001065296 | 0.016909828 | 0.69 |
| 863 | ENSG00000099139 | <i>PCSK5</i>     | 4 | 0.001065296 | 0.016909828 | 0.7  |
| 864 | ENSG00000173376 | <i>NDNF</i>      | 4 | 0.001065296 | 0.016909828 | 0.7  |
| 865 | ENSG00000179476 | <i>C14orf28</i>  | 4 | 0.001065296 | 0.016909828 | 0.7  |
| 866 | ENSG00000100299 | <i>ARSA</i>      | 4 | 0.001065296 | 0.016909828 | 0.71 |
| 867 | ENSG00000127990 | <i>SGCE</i>      | 4 | 0.001065296 | 0.016909828 | 0.71 |
| 868 | ENSG00000162692 | <i>VCAM1</i>     | 4 | 0.001065296 | 0.016909828 | 0.72 |
| 869 | ENSG00000166347 | <i>CY5A</i>      | 4 | 0.001065296 | 0.016909828 | 0.72 |
| 870 | ENSG00000167772 | <i>ANGPTL4</i>   | 4 | 0.001065296 | 0.016909828 | 0.72 |
| 871 | ENSG00000244242 | <i>IFITM10</i>   | 4 | 0.001065296 | 0.016909828 | 0.73 |
| 872 | ENSG00000159899 | <i>NPR2</i>      | 4 | 0.001065296 | 0.016909828 | 0.74 |
| 873 | ENSG00000169031 | <i>COL4A3</i>    | 4 | 0.001065296 | 0.016909828 | 0.74 |
| 874 | ENSG00000175470 | <i>PPP2R2D</i>   | 4 | 0.001065296 | 0.016909828 | 0.76 |
| 875 | ENSG00000106772 | <i>PRUNE2</i>    | 4 | 0.001065296 | 0.016909828 | 0.77 |
| 876 | ENSG00000148120 | <i>AOPEP</i>     | 4 | 0.001065296 | 0.016909828 | 0.77 |
| 877 | ENSG00000123405 | <i>NFE2</i>      | 4 | 0.001065296 | 0.016909828 | 0.78 |
| 878 | ENSG00000142784 | <i>WDTC1</i>     | 4 | 0.001065296 | 0.016909828 | 0.78 |
| 879 | ENSG00000109846 | <i>CRYAB</i>     | 4 | 0.001065296 | 0.016909828 | 0.79 |
| 880 | ENSG00000146205 | <i>ANO7</i>      | 4 | 0.001065296 | 0.016909828 | 0.79 |
| 881 | ENSG00000067840 | <i>PDZD4</i>     | 4 | 0.001065296 | 0.016909828 | 0.81 |
| 882 | ENSG00000082014 | <i>SMARCD3</i>   | 4 | 0.001065296 | 0.016909828 | 0.81 |
| 883 | ENSG00000145936 | <i>KCNMB1</i>    | 4 | 0.001065296 | 0.016909828 | 0.81 |
| 884 | ENSG00000171045 | <i>TSNARE1</i>   | 4 | 0.001065296 | 0.016909828 | 0.82 |
| 885 | ENSG00000103175 | <i>WFDC1</i>     | 4 | 0.001065296 | 0.016909828 | 0.83 |
| 886 | ENSG00000130707 | <i>ASS1</i>      | 4 | 0.001065296 | 0.016909828 | 0.85 |
| 887 | ENSG00000164930 | <i>FZD6</i>      | 4 | 0.001065296 | 0.016909828 | 0.85 |
| 888 | ENSG00000122971 | <i>ACADS</i>     | 4 | 0.001065296 | 0.016909828 | 0.86 |
| 889 | ENSG00000197879 | <i>MYO1C</i>     | 4 | 0.001065296 | 0.016909828 | 0.87 |
| 890 | ENSG00000143162 | <i>CREG1</i>     | 4 | 0.001065296 | 0.016909828 | 0.88 |
| 891 | ENSG00000164638 | <i>SLC29A4</i>   | 4 | 0.001065296 | 0.016909828 | 0.91 |
| 892 | ENSG00000011275 | <i>RNF216</i>    | 4 | 0.001065296 | 0.016909828 | 0.96 |
| 893 | ENSG00000181035 | <i>SLC25A42</i>  | 4 | 0.001065296 | 0.016909828 | 1.03 |
| 894 | ENSG00000089486 | <i>CDIP1</i>     | 4 | 0.001065296 | 0.016909828 | 1.04 |
| 895 | ENSG00000113504 | <i>SLC12A7</i>   | 4 | 0.001065296 | 0.016909828 | 1.04 |
| 896 | ENSG00000075618 | <i>FSCN1</i>     | 4 | 0.001065296 | 0.016909828 | 1.05 |
| 897 | ENSG00000109072 | <i>VTN</i>       | 4 | 0.001065296 | 0.016909828 | 1.07 |
| 898 | ENSG00000184227 | <i>ACOT1</i>     | 4 | 0.001065296 | 0.016909828 | 1.09 |
| 899 | ENSG00000177106 | <i>EPS8L2</i>    | 4 | 0.001065296 | 0.016909828 | 1.1  |
| 900 | ENSG00000166167 | <i>BTRC</i>      | 4 | 0.001065296 | 0.016909828 | 1.13 |
| 901 | ENSG00000184009 | <i>ACTG1</i>     | 4 | 0.001065296 | 0.016909828 | 1.17 |
| 902 | ENSG00000168434 | <i>COG7</i>      | 4 | 0.001065296 | 0.016909828 | 1.21 |
| 903 | ENSG00000213626 | <i>LBH</i>       | 4 | 0.001065296 | 0.016909828 | 1.25 |
| 904 | ENSG00000122335 | <i>SERAC1</i>    | 4 | 0.001065296 | 0.016909828 | 1.3  |
| 905 | ENSG00000172594 | <i>SMPDL3A</i>   | 4 | 0.001065296 | 0.016909828 | 1.39 |
| 906 | ENSG00000205710 | <i>C17orf107</i> | 4 | 0.001065296 | 0.016909828 | 1.39 |
| 907 | ENSG00000162734 | <i>PEA15</i>     | 4 | 0.001065296 | 0.016909828 | 1.42 |
| 908 | ENSG00000071246 | <i>VASH1</i>     | 4 | 0.001065296 | 0.016909828 | 1.47 |
| 909 | ENSG00000181788 | <i>SIAH2</i>     | 4 | 0.001065296 | 0.016909828 | 1.47 |
| 910 | ENSG00000182240 | <i>BACE2</i>     | 4 | 0.001065296 | 0.016909828 | 1.54 |
| 911 | ENSG00000067560 | <i>RHOA</i>      | 4 | 0.001065296 | 0.016909828 | 1.58 |
| 912 | ENSG00000084444 | <i>FAM234B</i>   | 4 | 0.001065296 | 0.016909828 | 1.79 |
| 913 | ENSG00000129988 | <i>LBP</i>       | 4 | 0.001065296 | 0.016909828 | 1.85 |
| 914 | ENSG00000131378 | <i>RFTN1</i>     | 4 | 0.001065296 | 0.016909828 | 1.86 |
| 915 | ENSG00000010322 | <i>NISCH</i>     | 4 | 0.001065296 | 0.016909828 | 2.08 |
| 916 | ENSG00000251493 | <i>FOXD1</i>     | 4 | 0.001065296 | 0.016909828 | 2.09 |
| 917 | ENSG00000214517 | <i>PPME1</i>     | 4 | 0.001065296 | 0.016909828 | 2.18 |
| 918 | ENSG00000102466 | <i>FGF14</i>     | 4 | 0.001065296 | 0.016909828 | 2.48 |
| 919 | ENSG00000134343 | <i>ANO3</i>      | 4 | 0.001065296 | 0.016909828 | 2.49 |
| 920 | ENSG00000186314 | <i>PRELID2</i>   | 4 | 0.001065296 | 0.016909828 | 2.59 |
| 921 | ENSG00000168938 | <i>PPIC</i>      | 4 | 0.001065296 | 0.016909828 | 2.73 |
| 922 | ENSG00000183979 | <i>NPB</i>       | 4 | 0.001065296 | 0.016909828 | 2.84 |
| 923 | ENSG00000166165 | <i>CKB</i>       | 4 | 0.001065296 | 0.016909828 | 3.02 |
| 924 | ENSG00000151322 | <i>NPAS3</i>     | 4 | 0.001065296 | 0.016909828 | 3.11 |
| 925 | ENSG00000111640 | <i>GAPDH</i>     | 4 | 0.001065296 | 0.016909828 | 3.94 |
| 926 | ENSG00000135437 | <i>RDH5</i>      | 4 | 0.001065296 | 0.016909828 | 3.99 |
| 927 | ENSG00000147872 | <i>PLIN2</i>     | 4 | 0.001065296 | 0.016909828 | 6.74 |
