# Supplementary material for: Decoding the differentiation of mesenchymal stem cells into mesangial cells at the transcriptomic level
Source: PubMed Central journal article supplement (PMC7339572; doi:10.1186/s12864-020-06868-5), 2020-07-07
Supplement: 12864_2020_6868_MOESM5_ESM.pdf [file 12864_2020_6868_MOESM5_ESM.pdf]

**A) Inferences of descending key genes to Marbach, TRRUSTv2 and ENCODE TF-Targets dataset**

| TF level | TF gene ID      | TF gene name | Key gene ID     | Key gene name | Marbach2016 | TRRUSTv2 | ENCODE TF-Targets dataset |
|----------|-----------------|--------------|-----------------|---------------|-------------|----------|---------------------------|
| 1        | ENSG00000137309 | HMGA1        | ENSG00000166825 | ANPEP         | 1           | 0        | 0                         |
| 1        | ENSG00000172819 | RARG         | ENSG00000166825 | ANPEP         | 1           | 0        | 0                         |
| 2        | ENSG00000125398 | SOX9         | ENSG00000166825 | ANPEP         | 1           | 0        | 0                         |
| 1        | ENSG00000101412 | E2F1         | ENSG00000087586 | AURKA         | 1           | 1        | 1                         |
| 1        | ENSG00000111206 | FOXM1        | ENSG00000134057 | CCNB1         | 0           | 1        | 1                         |
| 1        | ENSG00000125347 | IRF1         | ENSG00000134057 | CCNB1         | 1           | 0        | 1                         |
| 1        | ENSG00000137309 | HMGA1        | ENSG00000110092 | CCND1         | 1           | 0        | 0                         |
| 2        | ENSG00000001167 | NFYA         | ENSG00000110092 | CCND1         | 1           | 0        | 1                         |
| 1        | ENSG00000101412 | E2F1         | ENSG00000110092 | CCND1         | 0           | 1        | 0                         |
| 1        | ENSG00000129173 | E2F8         | ENSG00000094804 | CDC6          | 1           | 0        | 0                         |
| 1        | ENSG00000173153 | ESRRA        | ENSG00000094804 | CDC6          | 1           | 0        | 0                         |
| 1        | ENSG00000176692 | FOXC2        | ENSG00000094804 | CDC6          | 1           | 0        | 0                         |
| 1        | ENSG00000111206 | FOXM1        | ENSG00000094804 | CDC6          | 0           | 1        | 1                         |
| 2        | ENSG00000114315 | HES1         | ENSG00000094804 | CDC6          | 1           | 0        | 0                         |
| 2        | ENSG00000108788 | MLX          | ENSG00000094804 | CDC6          | 1           | 0        | 0                         |
| 1        | ENSG00000162599 | NFIA         | ENSG00000094804 | CDC6          | 1           | 0        | 0                         |
| 1        | ENSG00000121068 | TBX2         | ENSG00000094804 | CDC6          | 1           | 0        | 0                         |
| 1        | ENSG00000101412 | E2F1         | ENSG00000170312 | CDK1          | 0           | 1        | 1                         |
| 1        | ENSG00000153234 | NR4A2        | ENSG00000170312 | CDK1          | 1           | 0        | 0                         |
| 1        | ENSG00000134532 | SOX5         | ENSG00000163938 | GNL3          | 1           | 0        | 0                         |
| 1        | ENSG00000179388 | EGR3         | ENSG00000128342 | LIF           | 1           | 0        | 0                         |
| 1        | ENSG00000173153 | ESRRA        | ENSG00000128342 | LIF           | 1           | 0        | 0                         |
| 1        | ENSG00000106511 | MEOX2        | ENSG00000128342 | LIF           | 1           | 0        | 0                         |
| 1        | ENSG00000153234 | NR4A2        | ENSG00000128342 | LIF           | 1           | 0        | 0                         |

**B) Inferences of ascending key genes to Marbach, TRRUSTv2 and ENCODE TF-Targets dataset**

| TF level | TF gene ID      | TF gene name | Key gene ID     | Key gene name | Marbach2016 | TRRUSTv2 | ENCODE TF-Targets dataset |
|----------|-----------------|--------------|-----------------|---------------|-------------|----------|---------------------------|
| 7        | ENSG00000123405 | NFE2         | ENSG00000107796 | ACTA2         | 1           | 0        | 0                         |
| 8        | ENSG00000112658 | SRF          | ENSG00000107796 | ACTA2         | 1           | 0        | 1                         |
| 8        | ENSG00000126561 | STAT5A       | ENSG00000107796 | ACTA2         | 1           | 0        | 1                         |
| 8        | ENSG00000148737 | TCF7L2       | ENSG00000107796 | ACTA2         | 1           | 0        | 1                         |
| 8        | ENSG00000010030 | ETV7         | ENSG00000107796 | ACTA2         | 1           | 0        | 0                         |
| 8        | ENSG00000005073 | HOXA11       | ENSG00000107796 | ACTA2         | 1           | 0        | 0                         |
| 8        | ENSG00000007866 | TEAD3        | ENSG00000107796 | ACTA2         | 1           | 0        | 0                         |
| 8        | ENSG00000112182 | BACH2        | ENSG00000115461 | IGFBP5        | 1           | 0        | 0                         |
| 8        | ENSG00000253293 | HOXA10       | ENSG00000115461 | IGFBP5        | 1           | 0        | 0                         |
| 8        | ENSG00000147862 | NFIB         | ENSG00000115461 | IGFBP5        | 1           | 0        | 0                         |
| 8        | ENSG00000184271 | POU6F1       | ENSG00000115461 | IGFBP5        | 1           | 0        | 0                         |
| 8        | ENSG00000165804 | ZNF219       | ENSG00000115461 | IGFBP5        | 1           | 0        | 0                         |
| 8        | ENSG00000139083 | ETV6         | ENSG00000115461 | IGFBP5        | 0           | 1        | 0                         |
| 8        | ENSG00000150907 | FOXO1        | ENSG00000077943 | ITGA8         | 1           | 0        | 0                         |
| 8        | ENSG00000165804 | ZNF219       | ENSG00000140545 | MFG8          | 1           | 0        | 0                         |
| 8        | ENSG00000168610 | STAT3        | ENSG00000100345 | MYH9          | 1           | 0        | 1                         |
| 8        | ENSG00000150907 | FOXO1        | ENSG00000100345 | MYH9          | 1           | 0        | 0                         |
| 8        | ENSG00000118689 | FOXO3        | ENSG00000100345 | MYH9          | 1           | 0        | 0                         |
| 8        | ENSG00000172201 | ID4          | ENSG00000100345 | MYH9          | 1           | 0        | 0                         |
| 8        | ENSG00000124766 | SOX4         | ENSG00000100345 | MYH9          | 1           | 0        | 0                         |
| 7        | ENSG00000123405 | NFE2         | ENSG00000101605 | MYOM1         | 1           | 0        | 0                         |
| 7        | ENSG00000164920 | OSR2         | ENSG00000101605 | MYOM1         | 1           | 0        | 0                         |
| 8        | ENSG00000146592 | CREB5        | ENSG00000101605 | MYOM1         | 1           | 0        | 0                         |
| 8        | ENSG00000170370 | EMX2         | ENSG00000101605 | MYOM1         | 1           | 0        | 0                         |
| 8        | ENSG00000139083 | ETV6         | ENSG00000101605 | MYOM1         | 1           | 0        | 0                         |
| 8        | ENSG00000172201 | ID4          | ENSG00000101605 | MYOM1         | 1           | 0        | 0                         |
| 8        | ENSG00000164093 | PITX2        | ENSG00000101605 | MYOM1         | 1           | 0        | 0                         |
| 8        | ENSG00000148737 | TCF7L2       | ENSG00000101605 | MYOM1         | 1           | 0        | 0                         |
| 8        | ENSG00000007866 | TEAD3        | ENSG00000101605 | MYOM1         | 1           | 0        | 0                         |
| 9        | ENSG00000106031 | HOXA13       | ENSG00000101605 | MYOM1         | 1           | 0        | 0                         |
| 9        | ENSG00000186350 | RXRA         | ENSG00000101605 | MYOM1         | 1           | 0        | 0                         |
| 9        | ENSG00000152284 | TCF7L1       | ENSG00000101605 | MYOM1         | 1           | 0        | 0                         |
| 6        | ENSG00000105866 | SP4          | ENSG00000113721 | PDGFRB        | 1           | 0        | 0                         |
| 7        | ENSG00000184481 | FOXO4        | ENSG00000113721 | PDGFRB        | 1           | 0        | 0                         |
| 7        | ENSG00000120149 | MSX2         | ENSG00000113721 | PDGFRB        | 1           | 0        | 0                         |
| 8        | ENSG00000178573 | MAF          | ENSG00000113721 | PDGFRB        | 1           | 0        | 0                         |
| 8        | ENSG00000178665 | ZNF713       | ENSG00000113721 | PDGFRB        | 1           | 0        | 0                         |
| 8        | ENSG00000143437 | ARNT         | ENSG00000124212 | PTGIS         | 1           | 0        | 0                         |
| 8        | ENSG00000139083 | ETV6         | ENSG00000124212 | PTGIS         | 1           | 0        | 0                         |
| 8        | ENSG00000178573 | MAF          | ENSG00000124212 | PTGIS         | 1           | 0        | 0                         |
| 8        | ENSG00000147862 | NFIB         | ENSG00000124212 | PTGIS         | 1           | 0        | 0                         |
| 8        | ENSG00000184271 | POU6F1       | ENSG00000124212 | PTGIS         | 1           | 0        | 0                         |
| 8        | ENSG00000159216 | RUNX1        | ENSG00000124212 | PTGIS         | 1           | 0        | 0                         |
| 8        | ENSG00000007866 | TEAD3        | ENSG00000124212 | PTGIS         | 1           | 0        | 0                         |
| 9        | ENSG00000186350 | RXRA         | ENSG00000124212 | PTGIS         | 1           | 0        | 0                         |
| 7        | ENSG00000123405 | NFE2         | ENSG00000068976 | PYGM          | 1           | 0        | 0                         |
| 8        | ENSG00000131759 | RARA         | ENSG00000068976 | PYGM          | 1           | 0        | 0                         |
| 8        | ENSG00000112658 | SRF          | ENSG00000068976 | PYGM          | 1           | 0        | 0                         |
| 7        | ENSG00000123405 | NFE2         | ENSG00000135919 | SERPINE2      | 1           | 0        | 0                         |
| 8        | ENSG00000105419 | MEIS3        | ENSG00000135919 | SERPINE2      | 1           | 0        | 0                         |
| 9        | ENSG00000176842 | IRX5         | ENSG00000135919 | SERPINE2      | 1           | 0        | 0                         |
| 9        | ENSG00000152284 | TCF7L1       | ENSG00000135919 | SERPINE2      | 1           | 0        | 0                         |
| 8        | ENSG00000007866 | TEAD3        | ENSG00000149591 | TAGLN         | 1           | 0        | 0                         |
| 8        | ENSG00000112658 | SRF          | ENSG00000149591 | TAGLN         | 1           | 1        | 1                         |

**C) Inferences of vascular smooth muscle contraction related genes to Marbach, TRRUSTv2 and ENCODE TF-Targets dataset**

| TF level | TF gene ID      | TF gene name | Target gene ID  | Target gene name | Marbach2016 | TRRUSTv2 | ENCODE TF-Targets dataset |
|----------|-----------------|--------------|-----------------|------------------|-------------|----------|---------------------------|
| 8        | ENSG00000221869 | CEBPD        | ENSG00000072952 | MRV11            | 1           | 0        | 0                         |
| 7        | ENSG00000184481 | FOXO4        | ENSG00000072952 | MRV11            | 1           | 0        | 0                         |
| 8        | ENSG00000178573 | MAF          | ENSG00000072952 | MRV11            | 1           | 0        | 0                         |
| 8        | ENSG00000164093 | PITX2        | ENSG00000072952 | MRV11            | 1           | 0        | 0                         |
| 8        | ENSG00000124766 | SOX4         | ENSG00000072952 | MRV11            | 1           | 0        | 0                         |
| 8        | ENSG00000112658 | SRF          | ENSG00000072952 | MRV11            | 1           | 0        | 1                         |
| 9        | ENSG00000152284 | TCF7L1       | ENSG00000072952 | MRV11            | 1           | 0        | 0                         |
| 8        | ENSG00000148737 | TCF7L2       | ENSG00000072952 | MRV11            | 1           | 0        | 0                         |
| 8        | ENSG00000112182 | BACH2        | ENSG00000077157 | PPP1R12B         | 1           | 0        | 0                         |
| 8        | ENSG00000007866 | TEAD3        | ENSG00000077157 | PPP1R12B         | 1           | 0        | 0                         |
| 8        | ENSG00000126351 | THRA         | ENSG00000077157 | PPP1R12B         | 1           | 0        | 0                         |
| 8        | ENSG0000010030  | ETV7         | ENSG00000101335 | MYL9             | 1           | 0        | 0                         |
| 8        | ENSG00000112658 | SRF          | ENSG00000101335 | MYL9             | 1           | 1        | 1                         |
| 8        | ENSG0000010030  | ETV7         | ENSG00000107796 | ACTA2            | 1           | 0        | 0                         |
| 8        | ENSG00000005073 | HOXA11       | ENSG00000107796 | ACTA2            | 1           | 0        | 0                         |
| 7        | ENSG00000123405 | NFE2         | ENSG00000107796 | ACTA2            | 1           | 0        | 0                         |
| 8        | ENSG00000112658 | SRF          | ENSG00000107796 | ACTA2            | 1           | 0        | 1                         |
| 8        | ENSG00000126561 | STAT5A       | ENSG00000107796 | ACTA2            | 1           | 0        | 1                         |
| 8        | ENSG00000148737 | TCF7L2       | ENSG00000107796 | ACTA2            | 1           | 0        | 1                         |
| 8        | ENSG00000007866 | TEAD3        | ENSG00000107796 | ACTA2            | 1           | 0        | 0                         |
| 8        | ENSG00000172216 | CEBPB        | ENSG00000145936 | KCNMB1           | 1           | 0        | 0                         |
| 8        | ENSG00000140044 | JDP2         | ENSG00000145936 | KCNMB1           | 1           | 0        | 0                         |
| 8        | ENSG00000131759 | RARA         | ENSG00000145936 | KCNMB1           | 1           | 0        | 0                         |
| 8        | ENSG00000112658 | SRF          | ENSG00000145936 | KCNMB1           | 1           | 0        | 1                         |
| 8        | ENSG00000170265 | ZNF282       | ENSG00000145936 | KCNMB1           | 1           | 0        | 0                         |
| 8        | ENSG00000054598 | FOXC1        | ENSG00000151067 | CACNA1C          | 1           | 0        | 0                         |
| 9        | ENSG00000106031 | HOXA13       | ENSG00000151067 | CACNA1C          | 1           | 0        | 0                         |
| 8        | ENSG00000165030 | NFIL3        | ENSG00000151067 | CACNA1C          | 1           | 0        | 0                         |
| 8        | ENSG00000164093 | PITX2        | ENSG00000151067 | CACNA1C          | 1           | 0        | 0                         |
| 8        | ENSG00000143190 | POU2F1       | ENSG00000151067 | CACNA1C          | 1           | 0        | 0                         |
| 8        | ENSG00000126351 | THRA         | ENSG00000151067 | CACNA1C          | 1           | 0        | 0                         |
| 8        | ENSG00000151090 | THRB         | ENSG00000151067 | CACNA1C          | 1           | 0        | 0                         |
| 7        | ENSG00000131668 | BARX1        | ENSG00000160013 | PTGIR            | 1           | 0        | 0                         |
| 8        | ENSG0000010030  | ETV7         | ENSG00000160013 | PTGIR            | 1           | 0        | 0                         |
| 8        | ENSG00000131759 | RARA         | ENSG00000160013 | PTGIR            | 1           | 0        | 0                         |
| 8        | ENSG00000170265 | ZNF282       | ENSG00000160013 | PTGIR            | 1           | 0        | 0                         |
| 8        | ENSG00000139083 | ETV6         | ENSG00000167641 | PPP1R14A         | 1           | 0        | 0                         |
| 8        | ENSG00000124766 | SOX4         | ENSG00000167641 | PPP1R14A         | 1           | 0        | 0                         |
| 8        | ENSG00000112658 | SRF          | ENSG00000167641 | PPP1R14A         | 1           | 0        | 0                         |
| 9        | ENSG00000152284 | TCF7L1       | ENSG00000173175 | ADCY5            | 1           | 0        | 0                         |
