# Supplementary material for: Decoding the differentiation of mesenchymal stem cells into mesangial cells at the transcriptomic level
Source: PubMed Central journal article supplement (PMC7339572; doi:10.1186/s12864-020-06868-5), 2020-07-07
Supplement: 12864_2020_6868_MOESM6_ESM.pdf [file 12864_2020_6868_MOESM6_ESM.pdf]

Full list of enriched KEGG pathways in each level FDR < 0.05

| L1 | L2 | L3 | L4 | L5 | L6 | L7 | L8 | L9 | KEGG     | Pathway name                                               |
|----|----|----|----|----|----|----|----|----|----------|------------------------------------------------------------|
| 1  | 1  | 0  | 0  | 0  | 0  | 0  | 0  | 0  | hsa00970 | Aminoacyl-tRNA biosynthesis                                |
| 1  | 1  | 0  | 0  | 0  | 0  | 0  | 0  | 0  | hsa03410 | Base excision repair                                       |
| 1  | 1  | 0  | 0  | 0  | 0  | 0  | 0  | 0  | hsa03030 | DNA replication                                            |
| 1  | 1  | 0  | 0  | 0  | 0  | 0  | 0  | 0  | hsa03460 | Fanconi anemia pathway                                     |
| 1  | 1  | 0  | 0  | 0  | 0  | 0  | 0  | 0  | hsa03440 | Homologous recombination                                   |
| 1  | 1  | 0  | 0  | 0  | 0  | 0  | 0  | 0  | hsa04114 | Oocyte meiosis                                             |
| 1  | 1  | 0  | 0  | 0  | 0  | 0  | 0  | 0  | hsa00230 | Purine metabolism                                          |
| 1  | 1  | 1  | 0  | 0  | 0  | 0  | 0  | 0  | hsa04110 | Cell cycle                                                 |
| 1  | 1  | 1  | 0  | 0  | 0  | 0  | 0  | 0  | hsa03430 | Mismatch repair                                            |
| 1  | 1  | 1  | 0  | 0  | 0  | 0  | 0  | 0  | hsa03420 | Nucleotide excision repair                                 |
| 1  | 1  | 1  | 0  | 0  | 0  | 0  | 0  | 0  | hsa00240 | Pyrimidine metabolism                                      |
| 1  | 1  | 1  | 0  | 0  | 0  | 0  | 0  | 0  | hsa03008 | Ribosome biogenesis in eukaryotes                          |
| 1  | 1  | 1  | 1  | 0  | 0  | 0  | 0  | 0  | hsa03050 | Proteasome                                                 |
| 1  | 1  | 1  | 1  | 0  | 0  | 0  | 0  | 0  | hsa03013 | RNA transport                                              |
| 1  | 1  | 1  | 1  | 0  | 0  | 0  | 0  | 0  | hsa03040 | Spliceosome                                                |
| 0  | 1  | 0  | 0  | 0  | 0  | 0  | 0  | 0  | hsa04914 | Progesterone-mediated oocyte maturation                    |
| 0  | 1  | 1  | 0  | 0  | 0  | 0  | 0  | 0  | hsa04210 | Apoptosis                                                  |
| 0  | 1  | 1  | 1  | 0  | 0  | 0  | 0  | 0  | hsa03022 | Basal transcription factors                                |
| 0  | 1  | 1  | 1  | 0  | 0  | 0  | 0  | 0  | hsa03015 | mRNA surveillance pathway                                  |
| 0  | 1  | 1  | 1  | 0  | 0  | 0  | 0  | 0  | hsa03018 | RNA degradation                                            |
| 0  | 1  | 1  | 1  | 1  | 1  | 1  | 1  | 0  | hsa01100 | Metabolic pathways                                         |
| 0  | 0  | 1  | 0  | 0  | 0  | 0  | 0  | 0  | hsa00510 | N-Glycan biosynthesis                                      |
| 0  | 0  | 1  | 1  | 0  | 0  | 0  | 0  | 0  | hsa01130 | Biosynthesis of antibiotics                                |
| 0  | 0  | 1  | 1  | 0  | 0  | 0  | 0  | 0  | hsa00310 | Lysine degradation                                         |
| 0  | 0  | 1  | 1  | 1  | 0  | 0  | 0  | 0  | hsa04141 | Protein processing in endoplasmic reticulum                |
| 0  | 0  | 1  | 1  | 1  | 0  | 0  | 0  | 0  | hsa03020 | RNA polymerase                                             |
| 0  | 0  | 1  | 1  | 1  | 0  | 0  | 0  | 0  | hsa04120 | Ubiquitin mediated proteolysis                             |
| 0  | 0  | 0  | 1  | 0  | 0  | 0  | 0  | 0  | hsa05231 | Choline metabolism in cancer                               |
| 0  | 0  | 0  | 1  | 0  | 0  | 0  | 0  | 0  | hsa00020 | Citrate cycle (TCA cycle)                                  |
| 0  | 0  | 0  | 1  | 0  | 0  | 0  | 0  | 0  | hsa00563 | Glycosylphosphatidylinositol(GPI)-anchor biosynthesis      |
| 0  | 0  | 0  | 1  | 0  | 0  | 0  | 0  | 0  | hsa04146 | Peroxisome                                                 |
| 0  | 0  | 0  | 1  | 0  | 0  | 0  | 0  | 0  | hsa04070 | Phosphatidylinositol signaling system                      |
| 0  | 0  | 0  | 1  | 0  | 0  | 0  | 0  | 0  | hsa03060 | Protein export                                             |
| 0  | 0  | 0  | 1  | 0  | 0  | 0  | 0  | 0  | hsa05211 | Renal cell carcinoma                                       |
| 0  | 0  | 0  | 1  | 1  | 0  | 0  | 0  | 0  | hsa05100 | Bacterial invasion of epithelial cells                     |
| 0  | 0  | 0  | 1  | 1  | 0  | 0  | 0  | 0  | hsa05120 | Epithelial cell signaling in Helicobacter pylori infection |
| 0  | 0  | 0  | 1  | 1  | 0  | 0  | 0  | 0  | hsa05131 | Shigellosis                                                |
| 0  | 0  | 0  | 1  | 1  | 1  | 0  | 0  | 0  | hsa04722 | Neurotrophin signaling pathway                             |
| 0  | 0  | 0  | 1  | 1  | 1  | 0  | 0  | 0  | hsa05016 | Huntington's disease                                       |
| 0  | 0  | 0  | 1  | 1  | 1  | 1  | 0  | 0  | hsa05010 | Alzheimer's disease                                        |
| 0  | 0  | 0  | 1  | 1  | 1  | 1  | 0  | 0  | hsa05012 | Parkinson's disease                                        |
| 0  | 0  | 0  | 1  | 1  | 1  | 1  | 0  | 0  | hsa04932 | Non-alcoholic fatty liver disease (NAFLD)                  |
| 0  | 0  | 0  | 1  | 1  | 1  | 1  | 0  | 0  | hsa00190 | Oxidative phosphorylation                                  |
| 0  | 0  | 0  | 0  | 1  | 1  | 1  | 0  | 0  | hsa04142 | Lysosome                                                   |
| 0  | 0  | 0  | 0  | 1  | 1  | 1  | 1  | 0  | hsa03010 | Ribosome                                                   |
| 0  | 0  | 0  | 0  | 0  | 0  | 1  | 0  | 0  | hsa04520 | Adherens junction                                          |
| 0  | 0  | 0  | 0  | 0  | 0  | 1  | 0  | 0  | hsa04360 | Axon guidance                                              |
| 0  | 0  | 0  | 0  | 0  | 0  | 1  | 0  | 0  | hsa00531 | Glycosaminoglycan degradation                              |
| 0  | 0  | 0  | 0  | 0  | 0  | 1  | 1  | 0  | hsa04270 | Vascular smooth muscle contraction                         |
| 0  | 0  | 0  | 0  | 0  | 0  | 1  | 1  | 0  | hsa04512 | ECM-receptor interaction                                   |
| 0  | 0  | 0  | 0  | 0  | 0  | 1  | 1  | 0  | hsa04510 | Focal adhesion                                             |
| 0  | 0  | 0  | 0  | 0  | 0  | 1  | 1  | 0  | hsa04066 | HIF-1 signaling pathway                                    |
| 0  | 0  | 0  | 0  | 0  | 0  | 1  | 1  | 0  | hsa04910 | Insulin signaling pathway                                  |
| 0  | 0  | 0  | 0  | 0  | 0  | 1  | 1  | 0  | hsa00511 | Other glycan degradation                                   |
| 0  | 0  | 0  | 0  | 0  | 0  | 1  | 1  | 0  | hsa04921 | Oxytocin signaling pathway                                 |
| 0  | 0  | 0  | 0  | 0  | 0  | 1  | 1  | 0  | hsa04145 | Phagosome                                                  |
| 0  | 0  | 0  | 0  | 0  | 0  | 1  | 1  | 0  | hsa04611 | Platelet activation                                        |
| 0  | 0  | 0  | 0  | 0  | 0  | 1  | 1  | 0  | hsa04015 | Rap1 signaling pathway                                     |
| 0  | 0  | 0  | 0  | 0  | 0  | 1  | 1  | 0  | hsa04810 | Regulation of actin cytoskeleton                           |
| 0  | 0  | 0  | 0  | 0  | 0  | 1  | 1  | 1  | hsa04514 | Cell adhesion molecules (CAMs)                             |
| 0  | 0  | 0  | 0  | 0  | 0  | 1  | 1  | 1  | hsa05414 | Dilated cardiomyopathy                                     |
| 0  | 0  | 0  | 0  | 0  | 0  | 1  | 1  | 1  | hsa05410 | Hypertrophic cardiomyopathy (HCM)                          |
| 0  | 0  | 0  | 0  | 0  | 0  | 0  | 1  | 0  | hsa04152 | AMPK signaling pathway                                     |
| 0  | 0  | 0  | 0  | 0  | 0  | 0  | 1  | 0  | hsa01040 | Biosynthesis of unsaturated fatty acids                    |
| 0  | 0  | 0  | 0  | 0  | 0  | 0  | 1  | 0  | hsa04068 | FoxO signaling pathway                                     |
| 0  | 0  | 0  | 0  | 0  | 0  | 0  | 1  | 0  | hsa04670 | Leukocyte transendothelial migration                       |
| 0  | 0  | 0  | 0  | 0  | 0  | 0  | 1  | 0  | hsa04010 | MAPK signaling pathway                                     |
| 0  | 0  | 0  | 0  | 0  | 0  | 0  | 0  | 1  | hsa04530 | Tight junction                                             |
| 0  | 0  | 0  | 0  | 0  | 0  | 0  | 1  | 1  | hsa05412 | Arrhythmogenic right ventricular cardiomyopathy (ARVC)     |

| Term     | Pathway name                                               | P Value     | FDR (Benjamini-Hochberg method) | Level |
|----------|------------------------------------------------------------|-------------|---------------------------------|-------|
| hsa00970 | Aminoacyl-tRNA biosynthesis                                | 5.69E-04    | 0.01152069                      | L1    |
| hsa03410 | Base excision repair                                       | 1.68E-04    | 0.003990091                     | L1    |
| hsa04110 | Cell cycle                                                 | 6.88E-15    | 1.96E-12                        | L1    |
| hsa03030 | DNA replication                                            | 2.70E-14    | 3.86E-12                        | L1    |
| hsa03460 | Fanconi anemia pathway                                     | 1.93E-07    | 9.16E-06                        | L1    |
| hsa03440 | Homologous recombination                                   | 1.46E-04    | 0.003787921                     | L1    |
| hsa03430 | Mismatch repair                                            | 4.11E-05    | 0.001301931                     | L1    |
| hsa03420 | Nucleotide excision repair                                 | 1.02E-04    | 0.002907191                     | L1    |
| hsa04114 | Oocyte meiosis                                             | 3.14E-05    | 0.001116311                     | L1    |
| hsa03050 | Proteasome                                                 | 4.90E-04    | 0.01068541                      | L1    |
| hsa00230 | Purine metabolism                                          | 9.29E-04    | 0.017510916                     | L1    |
| hsa00240 | Pyrimidine metabolism                                      | 1.02E-07    | 5.81E-06                        | L1    |
| hsa03008 | Ribosome biogenesis in eukaryotes                          | 5.35E-08    | 3.81E-06                        | L1    |
| hsa03013 | RNA transport                                              | 2.55E-06    | 1.04E-04                        | L1    |
| hsa03040 | Spliceosome                                                | 6.83E-10    | 6.49E-08                        | L1    |
| hsa04110 | Cell cycle                                                 | 4.97E-15    | 1.44E-12                        | L2    |
| hsa03030 | DNA replication                                            | 1.73E-14    | 1.67E-12                        | L2    |
| hsa03460 | Fanconi anemia pathway                                     | 6.57E-10    | 3.80E-08                        | L2    |
| hsa03440 | Homologous recombination                                   | 3.14E-05    | 6.48E-04                        | L2    |
| hsa03430 | Mismatch repair                                            | 2.53E-07    | 7.32E-06                        | L2    |
| hsa03420 | Nucleotide excision repair                                 | 2.60E-07    | 6.84E-06                        | L2    |
| hsa04114 | Oocyte meiosis                                             | 1.27E-07    | 4.60E-06                        | L2    |
| hsa04914 | Progesterone-mediated oocyte maturation                    | 0.001946419 | 0.026456265                     | L2    |
| hsa03050 | Proteasome                                                 | 2.00E-07    | 6.42E-06                        | L2    |
| hsa00230 | Purine metabolism                                          | 8.73E-05    | 0.001681189                     | L2    |
| hsa00240 | Pyrimidine metabolism                                      | 8.74E-09    | 3.61E-07                        | L2    |
| hsa03008 | Ribosome biogenesis in eukaryotes                          | 7.06E-10    | 3.40E-08                        | L2    |
| hsa03018 | RNA degradation                                            | 7.63E-06    | 1.70E-04                        | L2    |
| hsa03013 | RNA transport                                              | 2.70E-12    | 1.95E-10                        | L2    |
| hsa03040 | Spliceosome                                                | 7.95E-15    | 1.16E-12                        | L2    |
| hsa00970 | Aminoacyl-tRNA biosynthesis                                | 0.00163523  | 0.02337098                      | L2    |
| hsa04210 | Apoptosis                                                  | 5.39E-04    | 0.008612076                     | L2    |
| hsa03022 | Basal transcription factors                                | 3.22E-04    | 0.005459108                     | L2    |
| hsa03410 | Base excision repair                                       | 2.75E-04    | 0.004950544                     | L2    |
| hsa01100 | Metabolic pathways                                         | 8.73E-04    | 0.01319934                      | L2    |
| hsa03015 | mRNA surveillance pathway                                  | 4.87E-06    | 1.17E-04                        | L2    |
| hsa04210 | Apoptosis                                                  | 2.30E-04    | 0.006659435                     | L3    |
| hsa03022 | Basal transcription factors                                | 4.37E-07    | 4.22E-05                        | L3    |
| hsa01130 | Biosynthesis of antibiotics                                | 3.85E-04    | 0.010096169                     | L3    |
| hsa00310 | Lysine degradation                                         | 0.001366431 | 0.030042252                     | L3    |
| hsa00510 | N-Glycan biosynthesis                                      | 0.001432656 | 0.029261075                     | L3    |
| hsa04110 | Cell cycle                                                 | 0.003164692 | 0.049785528                     | L3    |
| hsa01100 | Metabolic pathways                                         | 2.52E-05    | 0.001042067                     | L3    |
| hsa03430 | Mismatch repair                                            | 0.002053433 | 0.038961223                     | L3    |
| hsa03015 | mRNA surveillance pathway                                  | 2.11E-06    | 1.22E-04                        | L3    |
| hsa03420 | Nucleotide excision repair                                 | 7.66E-05    | 0.00246381                      | L3    |
| hsa03050 | Proteasome                                                 | 1.97E-05    | 9.52E-04                        | L3    |
| hsa04141 | Protein processing in endoplasmic reticulum                | 3.98E-04    | 0.009576996                     | L3    |
| hsa00240 | Pyrimidine metabolism                                      | 0.002297159 | 0.040827068                     | L3    |
| hsa03008 | Ribosome biogenesis in eukaryotes                          | 1.48E-06    | 1.08E-04                        | L3    |
| hsa03020 | RNA polymerase                                             | 0.002339763 | 0.03917248                      | L3    |
| hsa03013 | RNA transport                                              | 2.26E-09    | 3.28E-07                        | L3    |
| hsa03040 | Spliceosome                                                | 4.82E-14    | 1.40E-11                        | L3    |
| hsa04120 | Ubiquitin mediated proteolysis                             | 4.27E-05    | 0.001545895                     | L3    |
| hsa05100 | Bacterial invasion of epithelial cells                     | 1.69E-06    | 7.06E-05                        | L4    |
| hsa05231 | Choline metabolism in cancer                               | 0.001288296 | 0.019683387                     | L4    |
| hsa00020 | Citrate cycle (TCA cycle)                                  | 0.003642659 | 0.040290759                     | L4    |
| hsa04144 | Endocytosis                                                | 4.77E-09    | 1.40E-06                        | L4    |
| hsa05120 | Epithelial cell signaling in Helicobacter pylori infection | 4.56E-04    | 0.007395635                     | L4    |
| hsa00563 | Glycosylphosphatidylinositol(GPI)-anchor biosynthesis      | 0.00526481  | 0.048668216                     | L4    |
| hsa03015 | mRNA surveillance pathway                                  | 8.83E-08    | 6.47E-06                        | L4    |
| hsa04146 | Peroxisome                                                 | 0.004477181 | 0.045870329                     | L4    |
| hsa04070 | Phosphatidylinositol signaling system                      | 0.002826704 | 0.035418297                     | L4    |
| hsa03060 | Protein export                                             | 0.002176061 | 0.028595923                     | L4    |
| hsa04141 | Protein processing in endoplasmic reticulum                | 5.33E-08    | 5.21E-06                        | L4    |
| hsa05211 | Renal cell carcinoma                                       | 0.004527505 | 0.044812171                     | L4    |
| hsa03020 | RNA polymerase                                             | 4.83E-05    | 0.001087215                     | L4    |
| hsa05131 | Shigellosis                                                | 2.15E-05    | 5.25E-04                        | L4    |
| hsa04071 | Sphingolipid signaling pathway                             | 0.001780124 | 0.024552655                     | L4    |
| hsa05010 | Alzheimer's disease                                        | 6.25E-06    | 1.66E-04                        | L4    |
| hsa03022 | Basal transcription factors                                | 0.003160244 | 0.037905316                     | L4    |

|          |                                                            |             |             |    |
|----------|------------------------------------------------------------|-------------|-------------|----|
| hsa01130 | Biosynthesis of antibiotics                                | 0.00134308  | 0.019496785 | L4 |
| hsa05016 | Huntington's disease                                       | 1.05E-08    | 1.54E-06    | L4 |
| hsa00310 | Lysine degradation                                         | 0.003737926 | 0.039824708 | L4 |
| hsa01100 | Metabolic pathways                                         | 1.75E-06    | 6.40E-05    | L4 |
| hsa04722 | Neurotrophin signaling pathway                             | 0.00332709  | 0.038305555 | L4 |
| hsa04932 | Non-alcoholic fatty liver disease (NAFLD)                  | 2.30E-04    | 0.003959359 | L4 |
| hsa00190 | Oxidative phosphorylation                                  | 3.70E-06    | 1.08E-04    | L4 |
| hsa05012 | Parkinson's disease                                        | 3.06E-06    | 9.97E-05    | L4 |
| hsa03050 | Proteasome                                                 | 8.02E-05    | 0.001564515 | L4 |
| hsa05205 | Proteoglycans in cancer                                    | 0.005150172 | 0.049179507 | L4 |
| hsa03018 | RNA degradation                                            | 8.11E-05    | 0.00148374  | L4 |
| hsa03013 | RNA transport                                              | 1.52E-06    | 7.44E-05    | L4 |
| hsa03040 | Spliceosome                                                | 8.89E-08    | 5.21E-06    | L4 |
| hsa04120 | Ubiquitin mediated proteolysis                             | 5.11E-05    | 0.001069003 | L4 |
| hsa04120 | Ubiquitin mediated proteolysis                             | 9.10E-09    | 6.57E-07    | L5 |
| hsa05010 | Alzheimer's disease                                        | 1.72E-06    | 4.96E-05    | L5 |
| hsa05100 | Bacterial invasion of epithelial cells                     | 0.00257882  | 0.045569164 | L5 |
| hsa04144 | Endocytosis                                                | 2.58E-08    | 1.49E-06    | L5 |
| hsa05120 | Epithelial cell signaling in Helicobacter pylori infection | 0.002105935 | 0.049504073 | L5 |
| hsa05016 | Huntington's disease                                       | 7.54E-08    | 3.63E-06    | L5 |
| hsa04142 | Lysosome                                                   | 1.97E-04    | 0.005164404 | L5 |
| hsa01100 | Metabolic pathways                                         | 5.31E-07    | 1.92E-05    | L5 |
| hsa04722 | Neurotrophin signaling pathway                             | 0.002537554 | 0.047773485 | L5 |
| hsa04932 | Non-alcoholic fatty liver disease (NAFLD)                  | 1.54E-06    | 4.94E-05    | L5 |
| hsa00190 | Oxidative phosphorylation                                  | 7.95E-15    | 2.31E-12    | L5 |
| hsa05012 | Parkinson's disease                                        | 2.14E-09    | 2.07E-07    | L5 |
| hsa04141 | Protein processing in endoplasmic reticulum                | 4.19E-07    | 1.73E-05    | L5 |
| hsa03010 | Ribosome                                                   | 7.29E-11    | 1.05E-08    | L5 |
| hsa03020 | RNA polymerase                                             | 0.002157884 | 0.046888369 | L5 |
| hsa05131 | Shigellosis                                                | 0.002288203 | 0.046188462 | L5 |
| hsa05010 | Alzheimer's disease                                        | 3.92E-11    | 3.81E-09    | L6 |
| hsa05016 | Huntington's disease                                       | 4.33E-10    | 2.53E-08    | L6 |
| hsa01100 | Metabolic pathways                                         | 3.61E-09    | 1.76E-07    | L6 |
| hsa04722 | Neurotrophin signaling pathway                             | 8.73E-05    | 0.002546359 | L6 |
| hsa04932 | Non-alcoholic fatty liver disease (NAFLD)                  | 3.04E-07    | 1.27E-05    | L6 |
| hsa00190 | Oxidative phosphorylation                                  | 4.06E-16    | 6.48E-14    | L6 |
| hsa05012 | Parkinson's disease                                        | 2.45E-10    | 1.79E-08    | L6 |
| hsa03010 | Ribosome                                                   | 3.61E-33    | 1.05E-30    | L6 |
| hsa04144 | Endocytosis                                                | 7.17E-07    | 2.62E-05    | L6 |
| hsa04142 | Lysosome                                                   | 5.14E-05    | 0.00166602  | L6 |
| hsa04071 | Sphingolipid signaling pathway                             | 0.001478141 | 0.038505988 | L6 |
| hsa04520 | Adherens junction                                          | 0.00369944  | 0.042507928 | L7 |
| hsa04360 | Axon guidance                                              | 0.003091287 | 0.038673623 | L7 |
| hsa04512 | ECM-receptor interaction                                   | 3.25E-05    | 0.001191119 | L7 |
| hsa00531 | Glycosaminoglycan degradation                              | 0.002910087 | 0.038069976 | L7 |
| hsa04066 | HIF-1 signaling pathway                                    | 2.02E-04    | 0.004909463 | L7 |
| hsa04142 | Lysosome                                                   | 4.39E-06    | 3.22E-04    | L7 |
| hsa00511 | Other glycan degradation                                   | 0.001593658 | 0.024295485 | L7 |
| hsa04145 | Phagosome                                                  | 3.00E-04    | 0.006263096 | L7 |
| hsa05205 | Proteoglycans in cancer                                    | 0.003260011 | 0.039080186 | L7 |
| hsa04810 | Regulation of actin cytoskeleton                           | 2.29E-05    | 9.60E-04    | L7 |
| hsa05010 | Alzheimer's disease                                        | 6.75E-05    | 0.002194021 | L7 |
| hsa04514 | Cell adhesion molecules (CAMs)                             | 2.09E-04    | 0.004697069 | L7 |
| hsa05414 | Dilated cardiomyopathy                                     | 4.46E-04    | 0.008133322 | L7 |
| hsa04144 | Endocytosis                                                | 1.51E-06    | 2.21E-04    | L7 |
| hsa04510 | Focal adhesion                                             | 1.93E-05    | 9.43E-04    | L7 |
| hsa05410 | Hypertrophic cardiomyopathy (HCM)                          | 9.97E-04    | 0.017049157 | L7 |
| hsa04910 | Insulin signaling pathway                                  | 0.001208265 | 0.019487375 | L7 |
| hsa01100 | Metabolic pathways                                         | 1.51E-04    | 0.004026929 | L7 |
| hsa04932 | Non-alcoholic fatty liver disease (NAFLD)                  | 1.10E-05    | 6.45E-04    | L7 |
| hsa00190 | Oxidative phosphorylation                                  | 2.03E-06    | 1.98E-04    | L7 |
| hsa04921 | Oxytocin signaling pathway                                 | 0.001840064 | 0.025369573 | L7 |
| hsa05012 | Parkinson's disease                                        | 2.09E-04    | 0.004697069 | L7 |
| hsa04611 | Platelet activation                                        | 0.001638173 | 0.02373276  | L7 |
| hsa04015 | Rap1 signaling pathway                                     | 1.43E-04    | 0.004169934 | L7 |
| hsa03010 | Ribosome                                                   | 8.38E-23    | 2.46E-20    | L7 |
| hsa04270 | Vascular smooth muscle contraction                         | 4.03E-04    | 0.007845315 | L7 |
| hsa04152 | AMPK signaling pathway                                     | 0.002764207 | 0.037123199 | L8 |
| hsa01040 | Biosynthesis of unsaturated fatty acids                    | 0.001392946 | 0.026317766 | L8 |
| hsa04514 | Cell adhesion molecules (CAMs)                             | 4.76E-06    | 3.41E-04    | L8 |
| hsa05414 | Dilated cardiomyopathy                                     | 7.91E-06    | 4.54E-04    | L8 |
| hsa04510 | Focal adhesion                                             | 1.05E-06    | 3.02E-04    | L8 |

|          |                                                        |             |             |    |
|----------|--------------------------------------------------------|-------------|-------------|----|
| hsa04068 | FoxO signaling pathway                                 | 0.003916002 | 0.047781571 | L8 |
| hsa05410 | Hypertrophic cardiomyopathy (HCM)                      | 1.13E-06    | 1.61E-04    | L8 |
| hsa04910 | Insulin signaling pathway                              | 2.63E-04    | 0.00628188  | L8 |
| hsa04670 | Leukocyte transendothelial migration                   | 0.002985044 | 0.038248806 | L8 |
| hsa04010 | MAPK signaling pathway                                 | 7.33E-04    | 0.014926529 | L8 |
| hsa04921 | Oxytocin signaling pathway                             | 1.15E-05    | 5.51E-04    | L8 |
| hsa04611 | Platelet activation                                    | 1.27E-04    | 0.004052049 | L8 |
| hsa04015 | Rap1 signaling pathway                                 | 2.26E-06    | 2.17E-04    | L8 |
| hsa04530 | Tight junction                                         | 0.001735084 | 0.028892142 | L8 |
| hsa04270 | Vascular smooth muscle contraction                     | 2.33E-04    | 0.00605894  | L8 |
| hsa05412 | Arrhythmogenic right ventricular cardiomyopathy (ARVC) | 9.12E-05    | 0.003267151 | L8 |
| hsa04512 | ECM-receptor interaction                               | 1.33E-04    | 0.003807655 | L8 |
| hsa04144 | Endocytosis                                            | 5.05E-04    | 0.011090252 | L8 |
| hsa04066 | HIF-1 signaling pathway                                | 0.002032358 | 0.030263152 | L8 |
| hsa00511 | Other glycan degradation                               | 0.002604038 | 0.036725324 | L8 |
| hsa04145 | Phagosome                                              | 0.00177796  | 0.027975061 | L8 |
| hsa04810 | Regulation of actin cytoskeleton                       | 3.98E-05    | 0.001630149 | L8 |
| hsa03010 | Ribosome                                               | 0.001498573 | 0.026542218 | L8 |
| hsa05412 | Arrhythmogenic right ventricular cardiomyopathy (ARVC) | 1.53E-05    | 0.002036824 | L9 |
| hsa04514 | Cell adhesion molecules (CAMs)                         | 2.84E-06    | 7.58E-04    | L9 |
| hsa05414 | Dilated cardiomyopathy                                 | 2.39E-04    | 0.015839575 | L9 |
| hsa05410 | Hypertrophic cardiomyopathy (HCM)                      | 1.01E-04    | 0.008910191 | L9 |
