# Supplementary material for: Decoding the differentiation of mesenchymal stem cells into mesangial cells at the transcriptomic level
Source: PubMed Central journal article supplement (PMC7339572; doi:10.1186/s12864-020-06868-5), 2020-07-07
Supplement: 12864_2020_6868_MOESM8_ESM.pdf [file 12864_2020_6868_MOESM8_ESM.pdf]

## TO-GCN robustness analysis

In order to demonstrate the robustness of TO-GCN, we tested the level order stability by using 7 different TF genes with  $DE \leq 4$  and co-expressed with *FOSL1* ( $PCC > 0.99$ ) as new initial nodes to construct the corresponding TO-GCNs. We calculated the differences in level number for each TF gene against the original TO-GCN: the TO-GCN constructed with *FOSL1* as initial node.

The results showed that on average 5.5% of TFs in the original TO-GCN were assigned to a different level (Table 1). However, the average and standard deviation of the overall level change for each new TO-GCN with a different initial node is very small (Table 1). This indicated that the new ordered TO-GCNs are very similar to the original TO-GCN that was constructed with *FOSL1*.

**Table 1. Statistics of level order changes with different initial seeds**

| TF Gene ID of initial seed | DE value | Gene Name    | Proportion of TFs with Level Change | Mean of Level Change <sup>a</sup> | STDEV of Level Change |
|----------------------------|----------|--------------|-------------------------------------|-----------------------------------|-----------------------|
| ENSG00000111206            | 1        | <i>FOXMI</i> | 0.34%                               | 0.00                              | 0.06                  |
| ENSG00000137309            | 1        | <i>HMGA1</i> | 7.72%                               | 0.04                              | 0.27                  |
| ENSG00000137310            | 2        | <i>TCF19</i> | 6.13%                               | 0.05                              | 0.24                  |
| ENSG00000176692            | 2        | <i>FOXC2</i> | 7.14%                               | 0.04                              | 0.26                  |
| ENSG00000115163            | 3        | <i>CENPA</i> | 7.39%                               | 0.05                              | 0.27                  |
| ENSG00000007968            | 4        | <i>E2F2</i>  | 6.21%                               | -0.04                             | 0.25                  |
| ENSG00000115816            | 4        | <i>CEBPZ</i> | 3.61%                               | 0.03                              | 0.19                  |

a. For each node, the positive and negative number represented the respective level changes to lower or higher level; in new TO-GCN against the original TO-GCN that was constructed with *FOSL1*. Zero represents no change between two TO-GCNs. For example, if a node belonging to level 5 in original TO-GCN has changed to level 4 in the new TO-GCN, the level change value will be -1.
